# Supplementary material for: Differential Peripheral Proteomic Biosignature of Fluoxetine Response in a Mouse Model of Anxiety/Depression
Source: Front Cell Neurosci. 2017 Aug 16;11:237. doi: 10.3389/fncel.2017.00237 (PMC5561647; doi:10.3389/fncel.2017.00237)
Supplement: TABLE S2 — Protein identification by X!Tandem Pipeline across all samples.Group ID: Group which the protein belongs. All the proteins in a group have at least one peptide in common; Sub-Group ID: Sub-Group which the protein belongs. All the proteins in a sub-group are identified with the same valid peptides. The number of subgroups in which this peptide is present; Protein ID: A single reference to the protein in this grouping experiment (unique within a sample in individual mode); Description: Protein description as given by the identification engine. Protein description as it appears in the header of the fasta file; log(E-Value): Protein E-value expressed in log. Statistical value representing the number of times this protein would be identified randomly. Calculated as the product of unique peptide E-values in the sample; Coverage: Percentage of protein coverage; MW: Molecular weight of the protein expressed in KDa; size: The number of amino acid of the protein sequence; Spectra: Total number of scans (spectra) leading to the identification of this protein. The total number of spectra assigned by the identification engine to this protein; PAI: Protein Abundance Index: The PAI is an estimation of the abundance of the protein. PAI was defined as the number of sequenced peptides (fragmentation spectra assigned with significant score and as the top match to an individual identified protein) divided by the number of observable peptides per protein; emPAI: The emPAI is a PAI transformation such as: emP AI = 10P AI – 1. [file Table_2.xlsx]

## Sheet: CORT_XTandemPipeline_protein-2
Supplemental Table 2
Group ID	Sub-group ID	Protein ID	Description	log(E value)	Coverage	MW	size	Spectra	PAI	emPAI	number of MS samples
a1	a1.a1	a1.a1.a1	sp|P26039|TLN1_MOUSE Talin-1 OS=Mus musculus GN=Tln1 PE=1 SV=2	-1598.4	73	269.4	2541	2452	2.83495	682.835	18
a1	a1.a2	a1.a2.a1	sp|Q71LX4|TLN2_MOUSE Talin-2 OS=Mus musculus GN=Tln2 PE=1 SV=3	-151.024	6	253.3	2375	251	0.287129	0.936996	18
a2	a2.a1	a2.a1.a1	sp|P60710|ACTB_MOUSE Actin, cytoplasmic 1 OS=Mus musculus GN=Actb PE=1 SV=1	-794.868	88	41.6	375	2101	11.4	2.51189e+11	18
a2	a2.a2	a2.a2.a1	sp|P63260|ACTG_MOUSE Actin, cytoplasmic 2 OS=Mus musculus GN=Actg1 PE=1 SV=1	-752.239	88	41.7	375	1979	10.9333	8.57696e+10	18
a2	a2.a3	a2.a3.a1	sp|P68033|ACTC_MOUSE Actin, alpha cardiac muscle 1 OS=Mus musculus GN=Actc1 PE=1 SV=1	-257.397	53	41.9	377	909	4.26667	18477.5	18
a2	a2.a4	a2.a4.a1	sp|Q8BFZ3|ACTBL_MOUSE Beta-actin-like protein 2 OS=Mus musculus GN=Actbl2 PE=1 SV=1	-258.3	51	41.9	376	637	3.5	3161.28	18
a3	a3.a1	a3.a1.a1	sp|Q8BTM8|FLNA_MOUSE Filamin-A OS=Mus musculus GN=Flna PE=1 SV=5	-1055.24	68	280.8	2647	1477	1.71698	51.1172	18
a3	a3.a2	a3.a2.a1	sp|Q8VHX6-2|FLNC_MOUSE Isoform 2 of Filamin-C OS=Mus musculus GN=Flnc	-50.5861	3	287	2693	80	0.0847458	0.215474	18
a3	a3.a2	a3.a2.a2	sp|Q8VHX6|FLNC_MOUSE Filamin-C OS=Mus musculus GN=Flnc PE=1 SV=3	-50.5861	3	290.7	2726	80	0.0840336	0.213483	18
a3	a3.a3	a3.a3.a1	sp|Q80X90|FLNB_MOUSE Filamin-B OS=Mus musculus GN=Flnb PE=1 SV=3	-20.4512	2	277.4	2602	22	0.0423729	0.102485	12
a4	a4.a1	a4.a1.a1	sp|Q99JI6|RAP1B_MOUSE Ras-related protein Rap-1b OS=Mus musculus GN=Rap1b PE=1 SV=2	-211.396	80	20.7	184	371	6.125	1.33352e+06	18
a4	a4.a2	a4.a2.a1	sp|P62835|RAP1A_MOUSE Ras-related protein Rap-1A OS=Mus musculus GN=Rap1a PE=1 SV=1	-181.201	80	20.9	184	281	4.75	56233.1	18
a4	a4.a3	a4.a3.a1	sp|Q99P58|RB27B_MOUSE Ras-related protein Rab-27B OS=Mus musculus GN=Rab27b PE=1 SV=3	-123.724	74	24.5	218	189	2.1	124.893	18
a4	a4.a4	a4.a4.a1	sp|Q91V41|RAB14_MOUSE Ras-related protein Rab-14 OS=Mus musculus GN=Rab14 PE=1 SV=3	-121.079	87	23.8	215	149	1.42857	25.827	18
a4	a4.a5	a4.a5.a1	sp|P35279-2|RAB6A_MOUSE Isoform 2 of Ras-related protein Rab-6A OS=Mus musculus GN=Rab6a	-64.8434	53	23.5	208	111	1	9	18
a4	a4.a6	a4.a6.a1	sp|Q9D1G1|RAB1B_MOUSE Ras-related protein Rab-1B OS=Mus musculus GN=Rab1b PE=1 SV=1	-70.3414	63	22.1	201	107	1.16667	13.678	18
a4	a4.a7	a4.a7.a1	sp|P35279|RAB6A_MOUSE Ras-related protein Rab-6A OS=Mus musculus GN=Rab6a PE=1 SV=4	-61.217	53	23.5	208	105	0.923077	7.37678	18
a4	a4.a8	a4.a8.a1	sp|P61294|RAB6B_MOUSE Ras-related protein Rab-6B OS=Mus musculus GN=Rab6b PE=1 SV=1	-48.0486	35	23.4	208	91	0.666667	3.64159	18
a4	a4.a9	a4.a9.a1	sp|P62821|RAB1A_MOUSE Ras-related protein Rab-1A OS=Mus musculus GN=Rab1A PE=1 SV=3	-78.4257	66	22.6	205	88	1	9	18
a4	a4.b10	a4.b10.a1	sp|Q9ERI2|RB27A_MOUSE Ras-related protein Rab-27A OS=Mus musculus GN=Rab27a PE=1 SV=1	-49.4776	39	24.9	221	84	1	9	18
a4	a4.b11	a4.b11.a1	sp|P61027|RAB10_MOUSE Ras-related protein Rab-10 OS=Mus musculus GN=Rab10 PE=1 SV=1	-41.7557	43	22.4	200	68	0.636364	3.32876	18
a4	a4.b12	a4.b12.a1	sp|P08556|RASN_MOUSE GTPase NRas OS=Mus musculus GN=Nras PE=1 SV=1	-31.5942	28	21.1	189	65	1.28571	18.307	17
a4	a4.b13	a4.b13.a1	sp|P61028|RAB8B_MOUSE Ras-related protein Rab-8B OS=Mus musculus GN=Rab8b PE=1 SV=1	-40.114	30	23.5	207	62	0.5	2.16228	18
a4	a4.b14	a4.b14.a1	sp|Q9JKM7|RAB37_MOUSE Ras-related protein Rab-37 OS=Mus musculus GN=Rab37 PE=1 SV=2	-39.6576	40	24.6	223	58	0.533333	2.41455	18
a4	a4.b15	a4.b15.a1	sp|P55258|RAB8A_MOUSE Ras-related protein Rab-8A OS=Mus musculus GN=Rab8a PE=1 SV=2	-48.1073	37	23.6	207	55	0.636364	3.32876	17
a4	a4.b16	a4.b16.a1	sp|P32883-2|RASK_MOUSE Isoform 2B of GTPase KRas OS=Mus musculus GN=Kras	-30.1149	32	21.4	188	49	1.33333	20.5443	15
a4	a4.b17	a4.b17.a1	sp|Q91ZR1|RAB4B_MOUSE Ras-related protein Rab-4B OS=Mus musculus GN=Rab4b PE=1 SV=2	-29.3939	35	23.5	213	48	0.5	2.16228	17
a4	a4.b18	a4.b18.a1	sp|P35276|RAB3D_MOUSE Ras-related protein Rab-3D OS=Mus musculus GN=Rab3d PE=1 SV=1	-29.2167	33	24.3	219	47	0.461538	1.89427	18
a4	a4.b19	a4.b19.a1	sp|P61226|RAP2B_MOUSE Ras-related protein Rap-2b OS=Mus musculus GN=Rap2b PE=1 SV=1	-28.1148	39	20.4	183	36	0.666667	3.64159	17
a4	a4.b20	a4.b20.a1	sp|Q6PHN9|RAB35_MOUSE Ras-related protein Rab-35 OS=Mus musculus GN=Rab35 PE=1 SV=1	-19.3816	23	22.9	201	35	0.333333	1.15443	17
a4	a4.b21	a4.b21.a1	sp|P35283|RAB12_MOUSE Ras-related protein Rab-12 OS=Mus musculus GN=Rab12 PE=1 SV=3	-10.5553	9	27.2	243	30	0.142857	0.389495	17
a4	a4.b22	a4.b22.a1	sp|Q8CG50|RAB43_MOUSE Ras-related protein Rab-43 OS=Mus musculus GN=Rab43 PE=1 SV=1	-9.60818	13	23.2	210	24	0.142857	0.389495	16
a4	a4.b23	a4.b23.a1	sp|Q80ZJ1|RAP2A_MOUSE Ras-related protein Rap-2a OS=Mus musculus GN=Rap2a PE=1 SV=2	-12.5792	17	20.6	183	18	0.363636	1.31013	12
a5	a5.a1	a5.a1.a1	sp|P20029|GRP78_MOUSE 78 kDa glucose-regulated protein OS=Mus musculus GN=Hspa5 PE=1 SV=3	-367.53	57	72.3	655	578	2.48148	302.027	18
a5	a5.a2	a5.a2.a1	sp|P63017|HSP7C_MOUSE Heat shock cognate 71 kDa protein OS=Mus musculus GN=Hspa8 PE=1 SV=1	-298.713	63	70.7	646	551	2.64	435.516	18
a5	a5.a3	a5.a3.a1	sp|P17156|HSP72_MOUSE Heat shock-related 70 kDa protein 2 OS=Mus musculus GN=Hspa2 PE=1 SV=2	-101.553	18	69.5	633	184	0.62963	3.26216	18
a5	a5.a4	a5.a4.a1	sp|P38647|GRP75_MOUSE Stress-70 protein, mitochondrial OS=Mus musculus GN=Hspa9 PE=1 SV=3	-142.61	43	73.3	679	174	0.75	4.62341	18
a5	a5.a5	a5.a5.a1	sp|Q61696|HS71A_MOUSE Heat shock 70 kDa protein 1A OS=Mus musculus GN=Hspa1a PE=1 SV=2	-49.8565	18	69.9	641	70	0.416667	1.61016	18
a6	a6.a1	a6.a1.a1	sp|Q64727|VINC_MOUSE Vinculin OS=Mus musculus GN=Vcl PE=1 SV=4	-738.363	78	116.5	1066	1131	2.85714	718.686	18
a7	a7.a1	a7.a1.a1	sp|A2AQ07|TBB1_MOUSE Tubulin beta-1 chain OS=Mus musculus GN=Tubb1 PE=1 SV=1	-319.002	78	50.3	451	586	3.77778	5993.84	18
a7	a7.a2	a7.a2.a1	sp|P68372|TBB4B_MOUSE Tubulin beta-4B chain OS=Mus musculus GN=Tubb4b PE=1 SV=1	-260.745	74	49.7	445	443	3.27778	1894.74	18
a7	a7.a3	a7.a3.a1	sp|Q7TMM9|TBB2A_MOUSE Tubulin beta-2A chain OS=Mus musculus GN=Tubb2a PE=1 SV=1	-231.144	75	49.8	445	440	3	999	18
a7	a7.a4	a7.a4.a1	sp|P99024|TBB5_MOUSE Tubulin beta-5 chain OS=Mus musculus GN=Tubb5 PE=1 SV=1	-237.544	70	49.5	444	427	2.94444	878.923	18
a7	a7.a5	a7.a5.a1	sp|Q9CWF2|TBB2B_MOUSE Tubulin beta-2B chain OS=Mus musculus GN=Tubb2b PE=1 SV=1	-228.926	75	49.8	445	425	3	999	18
a7	a7.a6	a7.a6.a1	sp|Q9D6F9|TBB4A_MOUSE Tubulin beta-4A chain OS=Mus musculus GN=Tubb4a PE=1 SV=3	-202.688	62	49.5	444	362	2.5	315.228	18
a8	a8.a1	a8.a1.a1	sp|Q7TPR4|ACTN1_MOUSE Alpha-actinin-1 OS=Mus musculus GN=Actn1 PE=1 SV=1	-495.878	79	102.9	892	753	2.10638	126.756	18
a8	a8.a2	a8.a2.a1	sp|P57780|ACTN4_MOUSE Alpha-actinin-4 OS=Mus musculus GN=Actn4 PE=1 SV=1	-369.839	64	104.8	912	544	1.44	26.5423	18
a9	a9.a1	a9.a1.a1	sp|P63101|1433Z_MOUSE 14-3-3 protein zeta/delta OS=Mus musculus GN=Ywhaz PE=1 SV=1	-213.01	78	27.7	245	309	3.23077	1700.25	18
a9	a9.a2	a9.a2.a1	sp|P68510|1433F_MOUSE 14-3-3 protein eta OS=Mus musculus GN=Ywhah PE=1 SV=2	-163.387	72	28.1	246	266	2.5	315.228	18
a9	a9.a3	a9.a3.a1	sp|P62259|1433E_MOUSE 14-3-3 protein epsilon OS=Mus musculus GN=Ywhae PE=1 SV=1	-172.858	75	29.1	255	233	2.3125	204.353	18
a9	a9.a4	a9.a4.a1	sp|P61982|1433G_MOUSE 14-3-3 protein gamma OS=Mus musculus GN=Ywhag PE=1 SV=2	-115.713	69	28.2	247	174	1.92857	83.8343	18
a9	a9.a5	a9.a5.a1	sp|Q9CQV8|1433B_MOUSE 14-3-3 protein beta/alpha OS=Mus musculus GN=Ywhab PE=1 SV=3	-127.966	72	28	246	153	2.07692	118.378	18
a9	a9.a6	a9.a6.a1	sp|P68254|1433T_MOUSE 14-3-3 protein theta OS=Mus musculus GN=Ywhaq PE=1 SV=1	-111.983	70	27.7	245	141	1.75	55.2341	18
a9	a9.a7	a9.a7.a1	sp|O70456|1433S_MOUSE 14-3-3 protein sigma OS=Mus musculus GN=Sfn PE=1 SV=2	-27.4474	20	27.6	248	47	0.75	4.62341	18
b10	b10.a1	b10.a1.a1	sp|Q6IRU2|TPM4_MOUSE Tropomyosin alpha-4 chain OS=Mus musculus GN=Tpm4 PE=1 SV=3	-281.811	87	28.4	248	422	4.75	56233.1	18
b10	b10.a2	b10.a2.a1	sp|P21107-2|TPM3_MOUSE Isoform 2 of Tropomyosin alpha-3 chain OS=Mus musculus GN=Tpm3	-207.768	79	28.9	248	364	3.76923	5877.02	18
b10	b10.a3	b10.a3.a1	sp|P58774-2|TPM2_MOUSE Isoform 2 of Tropomyosin beta chain OS=Mus musculus GN=Tpm2	-167.677	77	32.9	284	177	3.25	1777.28	18
b10	b10.a4	b10.a4.a1	sp|P58771-2|TPM1_MOUSE Isoform 2 of Tropomyosin alpha-1 chain OS=Mus musculus GN=Tpm1	-138.664	68	32.6	284	163	3.08333	1210.53	18
b10	b10.a5	b10.a5.a1	sp|P21107|TPM3_MOUSE Tropomyosin alpha-3 chain OS=Mus musculus GN=Tpm3 PE=1 SV=3	-115.103	51	32.9	285	160	2.25	176.828	18
b11	b11.a1	b11.a1.a1	sp|P08113|ENPL_MOUSE Endoplasmin OS=Mus musculus GN=Hsp90b1 PE=1 SV=2	-286.735	56	92.3	802	415	1.68571	47.4969	18
b11	b11.a2	b11.a2.a1	sp|P11499|HS90B_MOUSE Heat shock protein HSP 90-beta OS=Mus musculus GN=Hsp90ab1 PE=1 SV=3	-235.495	57	83.1	724	329	1.54839	34.3498	18
b11	b11.a3	b11.a3.a1	sp|P07901|HS90A_MOUSE Heat shock protein HSP 90-alpha OS=Mus musculus GN=Hsp90aa1 PE=1 SV=4	-233.684	53	84.6	733	301	1.62069	40.7532	18
b11	b11.a4	b11.a4.a1	sp|Q9CQN1|TRAP1_MOUSE Heat shock protein 75 kDa, mitochondrial OS=Mus musculus GN=Trap1 PE=1 SV=1	-17.6028	4	80	706	19	0.0666667	0.165914	18
b12	b12.a1	b12.a1.a1	sp|Q9QUM0|ITA2B_MOUSE Integrin alpha-IIb OS=Mus musculus GN=Itga2b PE=1 SV=2	-503.574	60	112.5	1033	849	2.51351	325.222	18
b13	b13.a1	b13.a1.a1	sp|P68368|TBA4A_MOUSE Tubulin alpha-4A chain OS=Mus musculus GN=Tuba4a PE=1 SV=1	-278.54	81	49.8	448	523	3.33333	2153.43	18
b13	b13.a2	b13.a2.a1	sp|P68373|TBA1C_MOUSE Tubulin alpha-1C chain OS=Mus musculus GN=Tuba1c PE=1 SV=1	-241.575	79	49.8	449	475	2.83333	680.292	18
b13	b13.a3	b13.a3.a1	sp|P68369|TBA1A_MOUSE Tubulin alpha-1A chain OS=Mus musculus GN=Tuba1a PE=1 SV=1	-260.433	79	50	451	472	3	999	18
b13	b13.a4	b13.a4.a1	sp|Q9JJZ2|TBA8_MOUSE Tubulin alpha-8 chain OS=Mus musculus GN=Tuba8 PE=1 SV=1	-197.949	60	49.9	449	355	2.44444	277.256	18
b13	b13.a5	b13.a5.a1	sp|Q3UX10|TBAL3_MOUSE Tubulin alpha chain-like 3 OS=Mus musculus GN=Tubal3 PE=2 SV=2	-18.0394	4	49.9	446	53	0.363636	1.31013	18
b14	b14.a1	b14.a1.a1	sp|P35441|TSP1_MOUSE Thrombospondin-1 OS=Mus musculus GN=Thbs1 PE=1 SV=1	-573.54	61	129.4	1170	730	1.89286	77.1371	18
b15	b15.a1	b15.a1.a1	sp|O54890|ITB3_MOUSE Integrin beta-3 OS=Mus musculus GN=Itgb3 PE=1 SV=2	-417.217	67	86.6	787	710	2.54545	350.119	18
b16	b16.a1	b16.a1.a1	sp|P07724|ALBU_MOUSE Serum albumin OS=Mus musculus GN=Alb PE=1 SV=3	-478.309	78	68.5	608	650	2.9375	864.964	18
b17	b17.a1	b17.a1.a1	sp|P52480|KPYM_MOUSE Pyruvate kinase PKM OS=Mus musculus GN=Pkm PE=1 SV=4	-411.37	76	57.7	531	622	2.68966	488.39	18
b17	b17.a2	b17.a2.a1	sp|P52480-2|KPYM_MOUSE Isoform M1 of Pyruvate kinase PKM OS=Mus musculus GN=Pkm	-398.595	76	57.9	531	580	2.56667	367.695	18
b17	b17.a3	b17.a3.a1	sp|P53657|KPYR_MOUSE Pyruvate kinase PKLR OS=Mus musculus GN=Pklr PE=1 SV=1	-8.67531	4	62.2	574	16	0.0689655	0.172102	14
b18	b18.a1	b18.a1.a1	sp|Q01853|TERA_MOUSE Transitional endoplasmic reticulum ATPase OS=Mus musculus GN=Vcp PE=1 SV=4	-378.711	72	89.2	806	558	1.86842	72.862	18
b18	b18.a2	b18.a2.a1	sp|Q3UMC0|SPAT5_MOUSE Spermatogenesis-associated protein 5 OS=Mus musculus GN=Spata5 PE=1 SV=2	-6.74473	2	97.1	893	5	0.0434783	0.105295	4
b18	b18.a3	b18.a3.a1	sp|Q9D3R6-3|KATL2_MOUSE Isoform 3 of Katanin p60 ATPase-containing subunit A-like 2 OS=Mus musculus GN=Katnal2	-7.56864	4	46	409	5	0.1	0.258925	4
b18	b18.a3	b18.a3.a2	sp|Q9D3R6|KATL2_MOUSE Katanin p60 ATPase-containing subunit A-like 2 OS=Mus musculus GN=Katnal2 PE=2 SV=2	-7.56864	3	61	539	5	0.0909091	0.232847	4
b19	b19.a1	b19.a1.a1	sp|Q8K0E8|FIBB_MOUSE Fibrinogen beta chain OS=Mus musculus GN=Fgb PE=1 SV=1	-387.995	81	54.6	481	553	3.58333	3830.19	18
b20	b20.a1	b20.a1.a1	sp|P16546|SPTN1_MOUSE Spectrin alpha chain, non-erythrocytic 1 OS=Mus musculus GN=Sptan1 PE=1 SV=4	-638.65	50	284.2	2472	541	0.969697	8.32603	17
b20	b20.a2	b20.a2.a1	sp|P08032|SPTA1_MOUSE Spectrin alpha chain, erythrocytic 1 OS=Mus musculus GN=Spta1 PE=1 SV=3	-23.8441	4	279.5	2415	11	0.0564516	0.138811	6
b21	b21.a1	b21.a1.a1	sp|E9PV24|FIBA_MOUSE Fibrinogen alpha chain OS=Mus musculus GN=Fga PE=1 SV=1	-390.033	53	87.3	789	512	2.28125	190.095	18
b22	b22.a1	b22.a1.a1	sp|Q921I1|TRFE_MOUSE Serotransferrin OS=Mus musculus GN=Tf PE=1 SV=1	-302.547	64	76.6	697	350	1.54054	33.7169	18
b22	b22.a2	b22.a2.a1	sp|P54071|IDHP_MOUSE Isocitrate dehydrogenase [NADP], mitochondrial OS=Mus musculus GN=Idh2 PE=1 SV=3	-77.418	38	50.8	452	86	0.727273	4.3367	18
b22	b22.a3	b22.a3.a1	sp|O88844|IDHC_MOUSE Isocitrate dehydrogenase [NADP] cytoplasmic OS=Mus musculus GN=Idh1 PE=1 SV=2	-57.2656	32	46.6	414	61	0.571429	2.72759	18
b22	b22.a4	b22.a4.a1	sp|Q9DBD0|ICA_MOUSE Inhibitor of carbonic anhydrase OS=Mus musculus GN=Ica PE=1 SV=1	-12.9296	6	76.6	700	18	0.125	0.333521	15
b23	b23.a1	b23.a1.a1	sp|P40124|CAP1_MOUSE Adenylyl cyclase-associated protein 1 OS=Mus musculus GN=Cap1 PE=1 SV=4	-290.587	79	51.4	474	455	2.44	274.423	18
b23	b23.a2	b23.a2.a1	sp|Q9CYT6|CAP2_MOUSE Adenylyl cyclase-associated protein 2 OS=Mus musculus GN=Cap2 PE=1 SV=1	-25.2742	12	52.7	476	26	0.217391	0.649648	15
b24	b24.a1	b24.a1.a1	sp|Q8VCM7|FIBG_MOUSE Fibrinogen gamma chain OS=Mus musculus GN=Fgg PE=1 SV=1	-350.921	70	49.3	436	452	2.95455	899.628	18
b25	b25.a1	b25.a1.a1	sp|P11983|TCPA_MOUSE T-complex protein 1 subunit alpha OS=Mus musculus GN=Tcp1 PE=1 SV=3	-164.001	47	60.3	556	186	1.11111	11.9155	18
b25	b25.a2	b25.a2.a1	sp|P80315|TCPD_MOUSE T-complex protein 1 subunit delta OS=Mus musculus GN=Cct4 PE=1 SV=3	-130.175	52	57.9	539	150	1	9	18
b25	b25.a3	b25.a3.a1	sp|P80316|TCPE_MOUSE T-complex protein 1 subunit epsilon OS=Mus musculus GN=Cct5 PE=1 SV=1	-105.843	52	59.5	541	104	1.09091	11.3285	18
b26	b26.a1	b26.a1.a1	sp|P27773|PDIA3_MOUSE Protein disulfide-isomerase A3 OS=Mus musculus GN=Pdia3 PE=1 SV=2	-240.808	60	56.5	505	416	1.76923	57.7802	18
b27	b27.a1	b27.a1.a1	sp|P56480|ATPB_MOUSE ATP synthase subunit beta, mitochondrial OS=Mus musculus GN=Atp5b PE=1 SV=2	-246.61	73	56.2	529	411	2.30435	200.534	18
b28	b28.a1	b28.a1.a1	sp|Q9EQP2|EHD4_MOUSE EH domain-containing protein 4 OS=Mus musculus GN=Ehd4 PE=1 SV=1	-171.909	62	61.3	541	212	1.13793	12.7382	18
b28	b28.a2	b28.a2.a1	sp|Q9QXY6|EHD3_MOUSE EH domain-containing protein 3 OS=Mus musculus GN=Ehd3 PE=1 SV=2	-140.199	56	60.7	535	158	1.23077	16.0125	18
b28	b28.a3	b28.a3.a1	sp|Q9WVK4|EHD1_MOUSE EH domain-containing protein 1 OS=Mus musculus GN=Ehd1 PE=1 SV=1	-118.466	47	60.5	534	125	1.07407	10.8597	18
b29	b29.a1	b29.a1.a1	sp|P13020-2|GELS_MOUSE Isoform 2 of Gelsolin OS=Mus musculus GN=Gsn	-271.47	57	80.6	731	399	2.59091	388.86	18
b29	b29.a1	b29.a1.a2	sp|P13020|GELS_MOUSE Gelsolin OS=Mus musculus GN=Gsn PE=1 SV=3	-271.47	54	85.8	780	399	2.47826	299.788	18
b30	b30.a1	b30.a1.a1	sp|Q8CIZ8|VWF_MOUSE von Willebrand factor OS=Mus musculus GN=Vwf PE=1 SV=2	-367.277	27	308.8	2813	363	0.666667	3.64159	18
b31	b31.a1	b31.a1.a1	sp|P05064|ALDOA_MOUSE Fructose-bisphosphate aldolase A OS=Mus musculus GN=Aldoa PE=1 SV=2	-228.845	83	39.2	364	358	2.76471	580.709	18
b32	b32.a1	b32.a1.a1	sp|Q61739-2|ITA6_MOUSE Isoform Alpha-6X1A of Integrin alpha-6 OS=Mus musculus GN=Itga6	-231.849	43	119.4	1073	316	0.9375	7.65964	18
b33	b33.a1	b33.a1.a1	sp|Q03265|ATPA_MOUSE ATP synthase subunit alpha, mitochondrial OS=Mus musculus GN=Atp5a1 PE=1 SV=1	-208.771	52	59.6	553	316	1.53846	33.5511	18
b34	b34.a1	b34.a1.a1	sp|Q8VDD5|MYH9_MOUSE Myosin-9 OS=Mus musculus GN=Myh9 PE=1 SV=4	-345.831	37	226	1960	312	0.824742	5.67947	18
b34	b34.a2	b34.a2.a1	sp|O08638-2|MYH11_MOUSE Isoform 2 of Myosin-11 OS=Mus musculus GN=Myh11	-27.586	3	222.9	1938	39	0.0967742	0.249609	15
b34	b34.a2	b34.a2.a2	sp|O08638|MYH11_MOUSE Myosin-11 OS=Mus musculus GN=Myh11 PE=1 SV=1	-27.586	3	226.7	1972	39	0.0947368	0.243761	15
b35	b35.a1	b35.a1.a1	sp|D3Z6Q9|BIN2_MOUSE Bridging integrator 2 OS=Mus musculus GN=Bin2 PE=1 SV=1	-219.816	49	52.4	489	297	2.3125	204.353	18
b35	b35.a2	b35.a2.a1	sp|O08539-2|BIN1_MOUSE Isoform 2 of Myc box-dependent-interacting protein 1 OS=Mus musculus GN=Bin1	-10.2257	4	47.9	434	21	0.166667	0.467799	16
b35	b35.a2	b35.a2.a2	sp|O08539|BIN1_MOUSE Myc box-dependent-interacting protein 1 OS=Mus musculus GN=Bin1 PE=1 SV=1	-10.2257	3	64.3	588	21	0.142857	0.389495	16
b35	b35.a2	b35.a2.a3	sp|Q7TQF7|AMPH_MOUSE Amphiphysin OS=Mus musculus GN=Amph PE=1 SV=1	-10.2257	2	74.9	686	21	0.130435	0.350314	16
b36	b36.a1	b36.a1.a1	sp|P63038|CH60_MOUSE 60 kDa heat shock protein, mitochondrial OS=Mus musculus GN=Hspd1 PE=1 SV=1	-227.393	69	60.8	573	298	1.92	82.1764	18
b37	b37.a1	b37.a1.a1	sp|Q64518-3|AT2A3_MOUSE Isoform SERCA3C of Sarcoplasmic/endoplasmic reticulum calcium ATPase 3 OS=Mus musculus GN=Atp2a3	-230.518	39	112.1	1025	276	1.23077	16.0125	18
b37	b37.a1	b37.a1.a2	sp|Q64518|AT2A3_MOUSE Sarcoplasmic/endoplasmic reticulum calcium ATPase 3 OS=Mus musculus GN=Atp2a3 PE=1 SV=3	-230.518	38	113.4	1038	276	1.2	14.8489	18
b37	b37.a2	b37.a2.a1	sp|O55143-2|AT2A2_MOUSE Isoform 2 of Sarcoplasmic/endoplasmic reticulum calcium ATPase 2 OS=Mus musculus GN=Atp2a2	-70.7686	16	109.6	998	56	0.368421	1.33572	18
b37	b37.a2	b37.a2.a2	sp|O55143|AT2A2_MOUSE Sarcoplasmic/endoplasmic reticulum calcium ATPase 2 OS=Mus musculus GN=Atp2a2 PE=1 SV=2	-70.7686	16	114.7	1044	56	0.358974	1.28546	18
b38	b38.a1	b38.a1.a1	sp|P17182|ENOA_MOUSE Alpha-enolase OS=Mus musculus GN=Eno1 PE=1 SV=3	-254.499	73	47	434	291	2.5	315.228	18
b39	b39.a1	b39.a1.a1	sp|Q3V0K9|PLSI_MOUSE Plastin-1 OS=Mus musculus GN=Pls1 PE=1 SV=1	-155.664	50	70.3	630	235	0.970588	8.34519	18
b39	b39.a2	b39.a2.a1	sp|Q61233|PLSL_MOUSE Plastin-2 OS=Mus musculus GN=Lcp1 PE=1 SV=4	-79.9807	32	70	627	60	0.515152	2.27455	15
b40	b40.a1	b40.a1.a1	sp|Q62523|ZYX_MOUSE Zyxin OS=Mus musculus GN=Zyx PE=1 SV=2	-176.873	58	60.4	564	288	2.35294	224.393	18
b41	b41.a1	b41.a1.a1	sp|O55222|ILK_MOUSE Integrin-linked protein kinase OS=Mus musculus GN=Ilk PE=1 SV=2	-126.083	50	51.2	452	283	1.89474	77.476	18
b42	b42.a1	b42.a1.a1	sp|Q02053|UBA1_MOUSE Ubiquitin-like modifier-activating enzyme 1 OS=Mus musculus GN=Uba1 PE=1 SV=1	-239.399	43	117.6	1058	282	1.16216	13.5265	18
b42	b42.a2	b42.a2.a1	sp|P31254|UBA1Y_MOUSE Ubiquitin-like modifier-activating enzyme 1 Y OS=Mus musculus GN=Uba1y PE=1 SV=2	-37.238	5	117.8	1058	45	0.166667	0.467799	18
b43	b43.a1	b43.a1.a1	sp|P39655|LOX12_MOUSE Arachidonate 12-lipoxygenase, 12S-type OS=Mus musculus GN=Alox12 PE=1 SV=4	-218.664	63	75.2	663	266	1.44828	27.0722	18
b44	b44.a1	b44.a1.a1	sp|P09055|ITB1_MOUSE Integrin beta-1 OS=Mus musculus GN=Itgb1 PE=1 SV=1	-153.965	33	88.1	798	263	1.16129	13.4974	18
b45	b45.a1	b45.a1.a1	sp|Q8K558-2|TRML1_MOUSE Isoform 2 of Trem-like transcript 1 protein OS=Mus musculus GN=Treml1	-139.055	74	34.1	322	256	3.625	4215.97	18
b45	b45.a1	b45.a1.a2	sp|Q8K558|TRML1_MOUSE Trem-like transcript 1 protein OS=Mus musculus GN=Treml1 PE=1 SV=2	-139.055	75	33.4	317	256	3.625	4215.97	18
b46	b46.a1	b46.a1.a1	sp|P62962|PROF1_MOUSE Profilin-1 OS=Mus musculus GN=Pfn1 PE=1 SV=2	-166.663	94	14.9	140	255	4.5	31621.8	18
b47	b47.a1	b47.a1.a1	sp|P08752|GNAI2_MOUSE Guanine nucleotide-binding protein G(i) subunit alpha-2 OS=Mus musculus GN=Gnai2 PE=1 SV=5	-93.4976	55	40.4	355	110	1.25	16.7828	18
b47	b47.a2	b47.a2.a1	sp|P21279|GNAQ_MOUSE Guanine nucleotide-binding protein G(q) subunit alpha OS=Mus musculus GN=Gnaq PE=1 SV=4	-53.8145	26	42	359	69	0.647059	3.43669	18
b47	b47.a3	b47.a3.a1	sp|O70443|GNAZ_MOUSE Guanine nucleotide-binding protein G(z) subunit alpha OS=Mus musculus GN=Gnaz PE=1 SV=4	-39.5378	36	40.7	355	45	0.666667	3.64159	17
b47	b47.a4	b47.a4.a1	sp|Q9DC51|GNAI3_MOUSE Guanine nucleotide-binding protein G(k) subunit alpha OS=Mus musculus GN=Gnai3 PE=1 SV=3	-22.2959	13	40.4	354	37	0.266667	0.84785	16
b47	b47.a5	b47.a5.a1	sp|P27601|GNA13_MOUSE Guanine nucleotide-binding protein subunit alpha-13 OS=Mus musculus GN=Gna13 PE=1 SV=1	-41.8395	26	43.9	377	30	0.363636	1.31013	16
b47	b47.a6	b47.a6.a1	sp|P63094-2|GNAS2_MOUSE Isoform Gnas-2 of Guanine nucleotide-binding protein G(s) subunit alpha isoforms short OS=Mus musculus GN=Gnas	-17.1284	7	44.1	380	26	0.142857	0.389495	15
b47	b47.a6	b47.a6.a2	sp|P63094|GNAS2_MOUSE Guanine nucleotide-binding protein G(s) subunit alpha isoforms short OS=Mus musculus GN=Gnas PE=1 SV=1	-17.1284	6	45.5	394	26	0.142857	0.389495	15
b47	b47.a6	b47.a6.a3	sp|Q6R0H7-4|GNAS1_MOUSE Isoform XLas-4 of Guanine nucleotide-binding protein G(s) subunit alpha isoforms XLas OS=Mus musculus GN=Gnas	-17.1284	2	119.9	1119	26	0.0714286	0.178769	15
b47	b47.a6	b47.a6.a4	sp|Q6R0H7|GNAS1_MOUSE Guanine nucleotide-binding protein G(s) subunit alpha isoforms XLas OS=Mus musculus GN=Gnas PE=1 SV=1	-17.1284	2	121.3	1133	26	0.0714286	0.178769	15
b47	b47.a7	b47.a7.a1	sp|Q3V3I2|GNAT3_MOUSE Guanine nucleotide-binding protein G(t) subunit alpha-3 OS=Mus musculus GN=Gnat3 PE=1 SV=2	-11.6513	6	40.2	354	15	0.125	0.333521	13
b48	b48.a1	b48.a1.a1	sp|Q9WVA4|TAGL2_MOUSE Transgelin-2 OS=Mus musculus GN=Tagln2 PE=1 SV=4	-145.819	86	22.3	199	254	2.61538	411.463	18
b49	b49.a1	b49.a1.a1	sp|P47738|ALDH2_MOUSE Aldehyde dehydrogenase, mitochondrial OS=Mus musculus GN=Aldh2 PE=1 SV=1	-212.384	65	56.4	519	254	1.89474	77.476	18
b50	b50.a1	b50.a1.a1	sp|P14211|CALR_MOUSE Calreticulin OS=Mus musculus GN=Calr PE=1 SV=1	-205.379	74	47.9	416	250	2.2	157.489	18
b51	b51.a1	b51.a1.a1	sp|Q61316|HSP74_MOUSE Heat shock 70 kDa protein 4 OS=Mus musculus GN=Hspa4 PE=1 SV=1	-151.073	47	94	841	170	0.697674	3.98511	18
b51	b51.a2	b51.a2.a1	sp|P48722|HS74L_MOUSE Heat shock 70 kDa protein 4L OS=Mus musculus GN=Hspa4l PE=1 SV=2	-64.1014	28	94.2	838	65	0.363636	1.31013	18
b51	b51.a3	b51.a3.a1	sp|Q61699-2|HS105_MOUSE Isoform HSP105-beta of Heat shock protein 105 kDa OS=Mus musculus GN=Hsph1	-60.3683	20	91.5	814	51	0.309524	1.0395	18
b51	b51.a3	b51.a3.a2	sp|Q61699|HS105_MOUSE Heat shock protein 105 kDa OS=Mus musculus GN=Hsph1 PE=1 SV=2	-60.3683	18	96.2	858	51	0.309524	1.0395	18
b52	b52.a1	b52.a1.a1	sp|Q60932-2|VDAC1_MOUSE Isoform Mt-VDAC1 of Voltage-dependent anion-selective channel protein 1 OS=Mus musculus GN=Vdac1	-132.475	68	30.7	283	186	1.26667	17.4785	18
b52	b52.a1	b52.a1.a2	sp|Q60932|VDAC1_MOUSE Voltage-dependent anion-selective channel protein 1 OS=Mus musculus GN=Vdac1 PE=1 SV=3	-132.475	65	32.2	296	186	1.35714	21.7585	18
b52	b52.a2	b52.a2.a1	sp|Q60931|VDAC3_MOUSE Voltage-dependent anion-selective channel protein 3 OS=Mus musculus GN=Vdac3 PE=1 SV=1	-66.7207	46	30.7	283	93	1	9	18
b53	b53.a1	b53.a1.a1	sp|O88342|WDR1_MOUSE WD repeat-containing protein 1 OS=Mus musculus GN=Wdr1 PE=1 SV=3	-189.183	57	66.3	606	248	1.7619	56.7969	18
b54	b54.a1	b54.a1.a1	sp|O88783|FA5_MOUSE Coagulation factor V OS=Mus musculus GN=F5 PE=1 SV=1	-235.032	25	246.9	2183	244	0.617284	3.1427	18
b55	b55.a1	b55.a1.a1	sp|P35564|CALX_MOUSE Calnexin OS=Mus musculus GN=Canx PE=1 SV=1	-185.551	46	67.1	591	243	1.13793	12.7382	18
b56	b56.a1	b56.a1.a1	sp|P09103|PDIA1_MOUSE Protein disulfide-isomerase OS=Mus musculus GN=P4hb PE=1 SV=2	-197.236	64	56.9	509	241	1.57692	36.7505	18
b57	b57.a1	b57.a1.a1	sp|O89053|COR1A_MOUSE Coronin-1A OS=Mus musculus GN=Coro1a PE=1 SV=5	-171.755	58	50.9	461	237	2.53333	340.455	18
b58	b58.a1	b58.a1.a1	sp|P18760|COF1_MOUSE Cofilin-1 OS=Mus musculus GN=Cfl1 PE=1 SV=3	-176.157	81	18.5	166	227	3.33333	2153.43	18
b58	b58.a2	b58.a2.a1	sp|P45591|COF2_MOUSE Cofilin-2 OS=Mus musculus GN=Cfl2 PE=1 SV=1	-15.6765	18	18.6	166	20	0.3	0.995262	16
b59	b59.a1	b59.a1.a1	sp|P02088|HBB1_MOUSE Hemoglobin subunit beta-1 OS=Mus musculus GN=Hbb-b1 PE=1 SV=2	-178.307	76	15.8	147	230	3.09091	1231.85	18
b60	b60.a1	b60.a1.a1	sp|Q9JHK5|PLEK_MOUSE Pleckstrin OS=Mus musculus GN=Plek PE=1 SV=1	-191.564	49	39.8	350	227	3.75	5622.41	18
b61	b61.a1	b61.a1.a1	sp|Q62469|ITA2_MOUSE Integrin alpha-2 OS=Mus musculus GN=Itga2 PE=1 SV=2	-195.158	31	128.7	1178	225	0.85	6.07946	18
b62	b62.a1	b62.a1.a1	sp|P10126|EF1A1_MOUSE Elongation factor 1-alpha 1 OS=Mus musculus GN=Eef1a1 PE=1 SV=3	-131.46	51	50	462	224	1.76471	57.1709	18
b63	b63.a1	b63.a1.a1	sp|P07758|A1AT1_MOUSE Alpha-1-antitrypsin 1-1 OS=Mus musculus GN=Serpina1a PE=1 SV=4	-125.314	47	45.9	413	122	1.91667	81.5404	18
b63	b63.a1	b63.a1.a2	sp|Q00896|A1AT3_MOUSE Alpha-1-antitrypsin 1-3 OS=Mus musculus GN=Serpina1c PE=1 SV=2	-125.314	47	45.7	412	122	1.91667	81.5404	18
b63	b63.a2	b63.a2.a1	sp|Q00898|A1AT5_MOUSE Alpha-1-antitrypsin 1-5 OS=Mus musculus GN=Serpina1e PE=1 SV=1	-130.287	45	45.8	413	108	2	99	18
b63	b63.a3	b63.a3.a1	sp|P22599|A1AT2_MOUSE Alpha-1-antitrypsin 1-2 OS=Mus musculus GN=Serpina1b PE=1 SV=2	-126.996	50	45.9	413	104	1.83333	67.1292	18
b63	b63.a4	b63.a4.a1	sp|Q00897|A1AT4_MOUSE Alpha-1-antitrypsin 1-4 OS=Mus musculus GN=Serpina1d PE=1 SV=1	-107.167	40	45.9	413	87	1.66667	45.4159	18
b64	b64.a1	b64.a1.a1	sp|P16858|G3P_MOUSE Glyceraldehyde-3-phosphate dehydrogenase OS=Mus musculus GN=Gapdh PE=1 SV=2	-153.776	67	35.7	333	222	3.3	1994.26	18
b65	b65.a1	b65.a1.a1	sp|P09411|PGK1_MOUSE Phosphoglycerate kinase 1 OS=Mus musculus GN=Pgk1 PE=1 SV=4	-178.755	71	44.4	417	218	1.47619	28.9358	18
b66	b66.a1	b66.a1.a1	sp|Q9QYB1|CLIC4_MOUSE Chloride intracellular channel protein 4 OS=Mus musculus GN=Clic4 PE=1 SV=3	-82.2665	74	28.6	253	115	1.35714	21.7585	18
b66	b66.a2	b66.a2.a1	sp|Q9Z1Q5|CLIC1_MOUSE Chloride intracellular channel protein 1 OS=Mus musculus GN=Clic1 PE=1 SV=3	-92.3384	68	26.9	241	102	1.25	16.7828	18
b67	b67.a1	b67.a1.a1	sp|P80314|TCPB_MOUSE T-complex protein 1 subunit beta OS=Mus musculus GN=Cct2 PE=1 SV=4	-180.318	57	57.3	535	212	1.19231	14.5707	18
b68	b68.a1	b68.a1.a1	sp|Q64521|GPDM_MOUSE Glycerol-3-phosphate dehydrogenase, mitochondrial OS=Mus musculus GN=Gpd2 PE=1 SV=2	-177.496	52	80.8	727	211	1.14706	13.03	18
b69	b69.a1	b69.a1.a1	sp|P48036|ANXA5_MOUSE Annexin A5 OS=Mus musculus GN=Anxa5 PE=1 SV=1	-144.557	74	35.6	319	211	1.52941	32.8386	18
b70	b70.a1	b70.a1.a1	sp|P20152|VIME_MOUSE Vimentin OS=Mus musculus GN=Vim PE=1 SV=3	-128.521	60	53.6	466	70	0.90625	7.05842	12
b70	b70.a2	b70.a2.a1	sp|P04104|K2C1_MOUSE Keratin, type II cytoskeletal 1 OS=Mus musculus GN=Krt1 PE=1 SV=4	-37.2062	6	65.5	637	58	0.24	0.737801	18
b70	b70.a3	b70.a3.a1	sp|Q6IFZ6|K2C1B_MOUSE Keratin, type II cytoskeletal 1b OS=Mus musculus GN=Krt77 PE=1 SV=1	-35.3417	14	61.2	572	41	0.3125	1.05353	18
b70	b70.a4	b70.a4.a1	sp|Q922U2|K2C5_MOUSE Keratin, type II cytoskeletal 5 OS=Mus musculus GN=Krt5 PE=1 SV=1	-49.801	17	61.6	580	40	0.5	2.16228	16
b70	b70.a5	b70.a5.a1	sp|P50446|K2C6A_MOUSE Keratin, type II cytoskeletal 6A OS=Mus musculus GN=Krt6a PE=1 SV=3	-48.2609	18	59.2	553	33	0.37037	1.34623	16
b70	b70.a6	b70.a6.a1	sp|Q3TTY5|K22E_MOUSE Keratin, type II cytoskeletal 2 epidermal OS=Mus musculus GN=Krt2 PE=1 SV=1	-31.2757	14	70.8	707	31	0.243243	0.750827	12
b70	b70.a7	b70.a7.a1	sp|Q8VED5|K2C79_MOUSE Keratin, type II cytoskeletal 79 OS=Mus musculus GN=Krt79 PE=1 SV=2	-29.6399	8	57.4	531	29	0.222222	0.668101	15
b70	b70.a8	b70.a8.a1	sp|Q8BGZ7|K2C75_MOUSE Keratin, type II cytoskeletal 75 OS=Mus musculus GN=Krt75 PE=1 SV=1	-40.381	15	59.6	551	26	0.275862	0.887392	15
b70	b70.a9	b70.a9.a1	sp|Q6NXH9|K2C73_MOUSE Keratin, type II cytoskeletal 73 OS=Mus musculus GN=Krt73 PE=1 SV=1	-27.4111	11	58.8	539	23	0.24	0.737801	18
b70	b70.b10	b70.b10.a1	sp|Q9R0H5|K2C71_MOUSE Keratin, type II cytoskeletal 71 OS=Mus musculus GN=Krt71 PE=1 SV=1	-16.4815	7	57.3	524	20	0.115385	0.304321	18
b70	b70.b11	b70.b11.a1	sp|Q3UV17|K22O_MOUSE Keratin, type II cytoskeletal 2 oral OS=Mus musculus GN=Krt76 PE=1 SV=1	-18.6743	6	62.7	594	18	0.125	0.333521	15
b70	b70.b12	b70.b12.a1	sp|P08553|NFM_MOUSE Neurofilament medium polypeptide OS=Mus musculus GN=Nefm PE=1 SV=4	-5.75252	5	95.7	848	2	0.05	0.122018	1
b70	b70.b13	b70.b13.a1	sp|Q6IME9|K2C72_MOUSE Keratin, type II cytoskeletal 72 OS=Mus musculus GN=Krt72 PE=3 SV=1	-7.40894	4	56.6	520	2	0.0714286	0.178769	1
b71	b71.a1	b71.a1.a1	sp|P62137|PP1A_MOUSE Serine/threonine-protein phosphatase PP1-alpha catalytic subunit OS=Mus musculus GN=Ppp1ca PE=1 SV=1	-136.842	63	37.4	330	161	1.47059	28.5521	18
b71	b71.a2	b71.a2.a1	sp|P62141|PP1B_MOUSE Serine/threonine-protein phosphatase PP1-beta catalytic subunit OS=Mus musculus GN=Ppp1cb PE=1 SV=3	-122.461	56	37.1	327	146	1.3125	19.5353	18
b71	b71.a3	b71.a3.a1	sp|P63087-2|PP1G_MOUSE Isoform Gamma-2 of Serine/threonine-protein phosphatase PP1-gamma catalytic subunit OS=Mus musculus GN=Ppp1cc	-112.442	50	38.4	337	132	1.17647	14.0131	18
b71	b71.a3	b71.a3.a2	sp|P63087|PP1G_MOUSE Serine/threonine-protein phosphatase PP1-gamma catalytic subunit OS=Mus musculus GN=Ppp1cc PE=1 SV=1	-112.442	53	36.9	323	132	1.33333	20.5443	18
b71	b71.a4	b71.a4.a1	sp|P48453-2|PP2BB_MOUSE Isoform 1 of Serine/threonine-protein phosphatase 2B catalytic subunit beta isoform OS=Mus musculus GN=Ppp3cb	-20.9828	9	58.8	524	14	0.277778	0.895736	13
b71	b71.a4	b71.a4.a2	sp|P48453|PP2BB_MOUSE Serine/threonine-protein phosphatase 2B catalytic subunit beta isoform OS=Mus musculus GN=Ppp3cb PE=1 SV=2	-20.9828	9	59	525	14	0.277778	0.895736	13
b71	b71.a5	b71.a5.a1	sp|P63328-2|PP2BA_MOUSE Isoform 2 of Serine/threonine-protein phosphatase 2B catalytic subunit alpha isoform OS=Mus musculus GN=Ppp3ca	-21.761	9	57.5	511	14	0.294118	0.968419	13
b71	b71.a5	b71.a5.a2	sp|P63328|PP2BA_MOUSE Serine/threonine-protein phosphatase 2B catalytic subunit alpha isoform OS=Mus musculus GN=Ppp3ca PE=1 SV=1	-21.761	9	58.5	521	14	0.294118	0.968419	13
b72	b72.a1	b72.a1.a1	sp|P08249|MDHM_MOUSE Malate dehydrogenase, mitochondrial OS=Mus musculus GN=Mdh2 PE=1 SV=3	-131.841	64	35.5	338	206	1.22222	15.681	18
b73	b73.a1	b73.a1.a1	sp|P50396|GDIA_MOUSE Rab GDP dissociation inhibitor alpha OS=Mus musculus GN=Gdi1 PE=1 SV=3	-118.475	58	50.4	447	130	0.956522	8.04736	18
b73	b73.a2	b73.a2.a1	sp|Q61598|GDIB_MOUSE Rab GDP dissociation inhibitor beta OS=Mus musculus GN=Gdi2 PE=1 SV=1	-107.284	57	50.4	445	110	0.88	6.58578	18
b74	b74.a1	b74.a1.a1	sp|Q9D154|ILEUA_MOUSE Leukocyte elastase inhibitor A OS=Mus musculus GN=Serpinb1a PE=1 SV=1	-137.893	56	42.5	379	205	1.88235	75.2699	18
b75	b75.a1	b75.a1.a1	sp|P26041|MOES_MOUSE Moesin OS=Mus musculus GN=Msn PE=1 SV=3	-145.71	56	67.6	577	154	1.21429	15.3789	18
b75	b75.a2	b75.a2.a1	sp|P26043|RADI_MOUSE Radixin OS=Mus musculus GN=Rdx PE=1 SV=3	-60.2169	24	68.4	583	84	0.482759	2.0392	18
b75	b75.a3	b75.a3.a1	sp|P26040|EZRI_MOUSE Ezrin OS=Mus musculus GN=Ezr PE=1 SV=3	-46.875	20	69.3	586	60	0.387097	1.43835	17
b76	b76.a1	b76.a1.a1	sp|Q60605-2|MYL6_MOUSE Isoform Smooth muscle of Myosin light polypeptide 6 OS=Mus musculus GN=Myl6	-106.238	83	16.9	151	194	2.55556	358.381	18
b76	b76.a2	b76.a2.a1	sp|Q8CI43|MYL6B_MOUSE Myosin light chain 6B OS=Mus musculus GN=Myl6b PE=1 SV=1	-13.7959	10	22.7	207	17	0.181818	0.519911	16
b77	b77.a1	b77.a1.a1	sp|P62874|GBB1_MOUSE Guanine nucleotide-binding protein G(I)/G(S)/G(T) subunit beta-1 OS=Mus musculus GN=Gnb1 PE=1 SV=3	-116.421	62	37.3	340	133	1.72727	52.367	18
b77	b77.a2	b77.a2.a1	sp|P62880|GBB2_MOUSE Guanine nucleotide-binding protein G(I)/G(S)/G(T) subunit beta-2 OS=Mus musculus GN=Gnb2 PE=1 SV=3	-96.8188	60	37.2	340	103	1.54545	34.1119	18
b77	b77.a3	b77.a3.a1	sp|P29387|GBB4_MOUSE Guanine nucleotide-binding protein subunit beta-4 OS=Mus musculus GN=Gnb4 PE=1 SV=4	-26.6469	17	37.3	340	26	0.384615	1.42446	14
b78	b78.a1	b78.a1.a1	sp|O70400|PDLI1_MOUSE PDZ and LIM domain protein 1 OS=Mus musculus GN=Pdlim1 PE=1 SV=4	-124.339	79	35.7	327	188	1.86667	72.5642	18
b79	b79.a1	b79.a1.a1	sp|Q64324|STXB2_MOUSE Syntaxin-binding protein 2 OS=Mus musculus GN=Stxbp2 PE=1 SV=1	-161.579	54	66.2	593	178	1.33333	20.5443	18
b79	b79.a2	b79.a2.a1	sp|Q60770|STXB3_MOUSE Syntaxin-binding protein 3 OS=Mus musculus GN=Stxbp3 PE=1 SV=1	-13.3532	10	67.8	592	9	0.185185	0.53174	7
b80	b80.a1	b80.a1.a1	sp|P06151|LDHA_MOUSE L-lactate dehydrogenase A chain OS=Mus musculus GN=Ldha PE=1 SV=3	-156.623	66	36.4	332	184	1.82353	65.6085	18
b80	b80.a2	b80.a2.a1	sp|P00342|LDHC_MOUSE L-lactate dehydrogenase C chain OS=Mus musculus GN=Ldhc PE=1 SV=2	-16.6243	8	35.8	332	20	0.176471	0.501311	14
b81	b81.a1	b81.a1.a1	sp|Q63918|SDPR_MOUSE Serum deprivation-response protein OS=Mus musculus GN=Sdpr PE=1 SV=3	-135.16	48	46.6	418	184	1.1	11.5893	18
b82	b82.a1	b82.a1.a1	sp|P46638|RB11B_MOUSE Ras-related protein Rab-11B OS=Mus musculus GN=Rab11b PE=1 SV=3	-95.5089	58	24.4	218	180	1.30769	19.3092	18
b82	b82.a2	b82.a2.a1	sp|P62492|RB11A_MOUSE Ras-related protein Rab-11A OS=Mus musculus GN=Rab11a PE=1 SV=3	-80.9948	57	24.3	216	173	1.45455	27.4804	18
b83	b83.a1	b83.a1.a1	sp|Q9CQ19|MYL9_MOUSE Myosin regulatory light polypeptide 9 OS=Mus musculus GN=Myl9 PE=1 SV=3	-95.7381	83	19.8	172	135	2.75	561.341	18
b83	b83.a2	b83.a2.a1	sp|Q3THE2|ML12B_MOUSE Myosin regulatory light chain 12B OS=Mus musculus GN=Myl12b PE=1 SV=2	-70.3036	61	19.7	172	127	2.125	132.352	18
b84	b84.a1	b84.a1.a1	sp|Q8QZT1|THIL_MOUSE Acetyl-CoA acetyltransferase, mitochondrial OS=Mus musculus GN=Acat1 PE=1 SV=1	-118.79	62	44.7	424	177	1.27778	17.9574	18
b85	b85.a1	b85.a1.a1	sp|Q07235|GDN_MOUSE Glia-derived nexin OS=Mus musculus GN=Serpine2 PE=1 SV=2	-134.595	54	44.1	397	176	1.44444	26.8256	18
b86	b86.a1	b86.a1.a1	sp|Q922R8|PDIA6_MOUSE Protein disulfide-isomerase A6 OS=Mus musculus GN=Pdia6 PE=1 SV=3	-135.35	52	48	440	176	2	99	18
b87	b87.a1	b87.a1.a1	sp|Q64442|DHSO_MOUSE Sorbitol dehydrogenase OS=Mus musculus GN=Sord PE=1 SV=3	-111.78	62	38.1	357	174	1.5625	35.5174	18
b88	b88.a1	b88.a1.a1	sp|Q8CG03|PDE5A_MOUSE cGMP-specific 3',5'-cyclic phosphodiesterase OS=Mus musculus GN=Pde5a PE=1 SV=2	-165.595	38	98.2	865	174	0.725	4.30884	18
b89	b89.a1	b89.a1.a1	sp|Q99JW4|LIMS1_MOUSE LIM and senescent cell antigen-like-containing domain protein 1 OS=Mus musculus GN=Lims1 PE=1 SV=3	-102.479	58	37.1	325	165	2.36364	230.013	18
b89	b89.a2	b89.a2.a1	sp|Q91XD2|LIMS2_MOUSE LIM and senescent cell antigen-like-containing domain protein 2 OS=Mus musculus GN=Lims2 PE=1 SV=1	-32.6894	20	38.9	341	52	0.833333	5.81292	15
b90	b90.a1	b90.a1.a1	sp|P56399|UBP5_MOUSE Ubiquitin carboxyl-terminal hydrolase 5 OS=Mus musculus GN=Usp5 PE=1 SV=1	-116.815	39	95.7	858	124	0.806452	5.404	18
b90	b90.a2	b90.a2.a1	sp|Q8BY89-2|CTL2_MOUSE Isoform 2 of Choline transporter-like protein 2 OS=Mus musculus GN=Slc44a2	-27.6161	12	79.8	704	43	0.333333	1.15443	13
b90	b90.a2	b90.a2.a2	sp|Q8BY89|CTL2_MOUSE Choline transporter-like protein 2 OS=Mus musculus GN=Slc44a2 PE=1 SV=2	-27.6161	12	79.9	706	43	0.333333	1.15443	13
b91	b91.a1	b91.a1.a1	sp|Q9D8N0|EF1G_MOUSE Elongation factor 1-gamma OS=Mus musculus GN=Eef1g PE=1 SV=3	-94.9986	37	49.9	437	165	1.11765	12.1113	18
b92	b92.a1	b92.a1.a1	sp|P47753|CAZA1_MOUSE F-actin-capping protein subunit alpha-1 OS=Mus musculus GN=Capza1 PE=1 SV=4	-69.2696	60	32.8	286	90	1.41667	25.1016	18
b92	b92.a2	b92.a2.a1	sp|P47754|CAZA2_MOUSE F-actin-capping protein subunit alpha-2 OS=Mus musculus GN=Capza2 PE=1 SV=3	-61.011	56	32.9	286	87	1	9	18
b93	b93.a1	b93.a1.a1	sp|P07759|SPA3K_MOUSE Serine protease inhibitor A3K OS=Mus musculus GN=Serpina3k PE=1 SV=2	-144.708	46	46.8	418	155	1.36842	22.3572	18
b93	b93.a2	b93.a2.a1	sp|Q03734|SPA3M_MOUSE Serine protease inhibitor A3M OS=Mus musculus GN=Serpina3m PE=1 SV=2	-93.1453	28	46.9	418	96	0.809524	5.44947	18
b93	b93.a3	b93.a3.a1	sp|Q91WP6|SPA3N_MOUSE Serine protease inhibitor A3N OS=Mus musculus GN=Serpina3n PE=1 SV=1	-31.2641	10	46.6	418	46	0.35	1.23872	18
b93	b93.a4	b93.a4.a1	sp|Q5I2A0|SPA3G_MOUSE Serine protease inhibitor A3G OS=Mus musculus GN=Serpina3g PE=1 SV=2	-22.0858	8	48.9	440	41	0.315789	1.06914	18
b94	b94.a1	b94.a1.a1	sp|Q08093|CNN2_MOUSE Calponin-2 OS=Mus musculus GN=Cnn2 PE=1 SV=1	-130.341	72	33.1	305	164	2.58333	382.119	18
b95	b95.a1	b95.a1.a1	sp|P04202|TGFB1_MOUSE Transforming growth factor beta-1 OS=Mus musculus GN=Tgfb1 PE=1 SV=1	-107.314	40	44.2	390	163	1	9	18
b96	b96.a1	b96.a1.a1	sp|P60766|CDC42_MOUSE Cell division control protein 42 homolog OS=Mus musculus GN=Cdc42 PE=1 SV=2	-81.1071	73	21.2	191	100	1.875	73.9894	18
b96	b96.a2	b96.a2.a1	sp|P63001|RAC1_MOUSE Ras-related C3 botulinum toxin substrate 1 OS=Mus musculus GN=Rac1 PE=1 SV=1	-34.3475	38	21.4	192	43	1	9	18
b96	b96.a3	b96.a3.a1	sp|Q05144|RAC2_MOUSE Ras-related C3 botulinum toxin substrate 2 OS=Mus musculus GN=Rac2 PE=1 SV=1	-27.2876	26	21.3	192	36	0.625	3.21697	17
b96	b96.a4	b96.a4.a1	sp|P84096|RHOG_MOUSE Rho-related GTP-binding protein RhoG OS=Mus musculus GN=Rhog PE=1 SV=1	-39.7521	41	21.2	191	29	0.777778	4.99484	12
b97	b97.a1	b97.a1.a1	sp|P42932|TCPQ_MOUSE T-complex protein 1 subunit theta OS=Mus musculus GN=Cct8 PE=1 SV=3	-130.83	49	59.4	548	157	0.84375	5.97831	18
b98	b98.a1	b98.a1.a1	sp|P70460|VASP_MOUSE Vasodilator-stimulated phosphoprotein OS=Mus musculus GN=Vasp PE=1 SV=4	-105.152	48	39.6	375	156	1.78571	60.054	18
b99	b99.a1	b99.a1.a1	sp|P17751|TPIS_MOUSE Triosephosphate isomerase OS=Mus musculus GN=Tpi1 PE=1 SV=4	-139.898	72	32.1	299	156	1.23529	16.1907	18
c100	c100.a1	c100.a1.a1	sp|P31324|KAP3_MOUSE cAMP-dependent protein kinase type II-beta regulatory subunit OS=Mus musculus GN=Prkar2b PE=1 SV=3	-158.197	63	46	416	156	1.25	16.7828	18
c101	c101.a1	c101.a1.a1	sp|Q61599|GDIR2_MOUSE Rho GDP-dissociation inhibitor 2 OS=Mus musculus GN=Arhgdib PE=1 SV=3	-103.992	67	22.8	200	156	2.66667	463.159	18
c102	c102.a1	c102.a1.a1	sp|Q9ES46|PARVB_MOUSE Beta-parvin OS=Mus musculus GN=Parvb PE=1 SV=1	-103.326	45	41.6	365	156	1.26667	17.4785	18
c103	c103.a1	c103.a1.a1	sp|P11835|ITB2_MOUSE Integrin beta-2 OS=Mus musculus GN=Itgb2 PE=1 SV=2	-161.463	43	84.9	771	152	0.74359	4.54102	18
c103	c103.a2	c103.a2.a1	sp|O70309-2|ITB5_MOUSE Isoform Beta-5B of Integrin beta-5 OS=Mus musculus GN=Itgb5	-10.0535	5	89.9	816	4	0.075	0.188502	3
c103	c103.a2	c103.a2.a2	sp|O70309|ITB5_MOUSE Integrin beta-5 OS=Mus musculus GN=Itgb5 PE=1 SV=2	-10.0535	5	87.7	798	4	0.0769231	0.193777	3
c104	c104.a1	c104.a1.a1	sp|O35930|GP1BA_MOUSE Platelet glycoprotein Ib alpha chain OS=Mus musculus GN=Gp1ba PE=1 SV=2	-127.054	29	79.9	734	154	2	99	18
c105	c105.a1	c105.a1.a1	sp|Q8C1B7-2|SEP11_MOUSE Isoform 2 of Septin-11 OS=Mus musculus GN=Sept11	-76.7714	39	49.2	429	81	0.7	4.01187	18
c105	c105.a1	c105.a1.a2	sp|Q8C1B7-3|SEP11_MOUSE Isoform 3 of Septin-11 OS=Mus musculus GN=Sept11	-76.7714	40	48.8	425	81	0.7	4.01187	18
c105	c105.a1	c105.a1.a3	sp|Q8C1B7|SEP11_MOUSE Septin-11 OS=Mus musculus GN=Sept11 PE=1 SV=4	-76.7714	39	49.6	431	81	0.666667	3.64159	18
c105	c105.a2	c105.a2.a1	sp|O55131|SEPT7_MOUSE Septin-7 OS=Mus musculus GN=Sept7 PE=1 SV=1	-89.8365	45	50.4	436	71	0.761905	4.77969	18
c105	c105.a3	c105.a3.a1	sp|Q8CHH9-2|SEPT8_MOUSE Isoform 2 of Septin-8 OS=Mus musculus GN=Sept8	-14.478	10	49.8	430	10	0.166667	0.467799	8
c105	c105.a3	c105.a3.a2	sp|Q8CHH9|SEPT8_MOUSE Septin-8 OS=Mus musculus GN=Sept8 PE=1 SV=4	-14.478	10	49.7	429	10	0.166667	0.467799	8
c105	c105.a4	c105.a4.a1	sp|Q9R1T4-2|SEPT6_MOUSE Isoform I of Septin-6 OS=Mus musculus GN=Sept6	-19.9318	7	48.6	427	10	0.176471	0.501311	8
c105	c105.a4	c105.a4.a2	sp|Q9R1T4-3|SEPT6_MOUSE Isoform V of Septin-6 OS=Mus musculus GN=Sept6	-19.9318	7	48.9	429	10	0.176471	0.501311	8
c105	c105.a4	c105.a4.a3	sp|Q9R1T4|SEPT6_MOUSE Septin-6 OS=Mus musculus GN=Sept6 PE=1 SV=4	-19.9318	7	49.5	434	10	0.166667	0.467799	8
c106	c106.a1	c106.a1.a1	sp|P17742|PPIA_MOUSE Peptidyl-prolyl cis-trans isomerase A OS=Mus musculus GN=Ppia PE=1 SV=2	-85.141	65	17.9	164	153	2.57143	371.759	18
c107	c107.a1	c107.a1.a1	sp|Q99JY9|ARP3_MOUSE Actin-related protein 3 OS=Mus musculus GN=Actr3 PE=1 SV=3	-110.743	55	47.2	418	152	1.375	22.7137	18
c108	c108.a1	c108.a1.a1	sp|P47757-2|CAPZB_MOUSE Isoform 2 of F-actin-capping protein subunit beta OS=Mus musculus GN=Capzb	-109.213	67	30.5	272	148	2	99	18
c109	c109.a1	c109.a1.a1	sp|P28665|MUG1_MOUSE Murinoglobulin-1 OS=Mus musculus GN=Mug1 PE=1 SV=3	-223.572	37	165	1476	147	0.981481	8.58256	15
c110	c110.a1	c110.a1.a1	sp|Q99K41|EMIL1_MOUSE EMILIN-1 OS=Mus musculus GN=Emilin1 PE=1 SV=1	-212.27	40	107.4	1017	145	0.702128	4.03649	9
c111	c111.a1	c111.a1.a1	sp|Q01730|RSU1_MOUSE Ras suppressor protein 1 OS=Mus musculus GN=Rsu1 PE=1 SV=3	-94.8374	63	31.4	277	144	2.5	315.228	18
c112	c112.a1	c112.a1.a1	sp|P08003|PDIA4_MOUSE Protein disulfide-isomerase A4 OS=Mus musculus GN=Pdia4 PE=1 SV=3	-135.247	41	71.8	638	143	0.818182	5.57933	18
c113	c113.a1	c113.a1.a1	sp|O35601|FYB_MOUSE FYN-binding protein OS=Mus musculus GN=Fyb PE=1 SV=2	-138.959	39	89.9	819	142	1.3913	23.6209	18
c114	c114.a1	c114.a1.a1	sp|Q9Z126|PLF4_MOUSE Platelet factor 4 OS=Mus musculus GN=Pf4 PE=1 SV=1	-82.2972	52	11.2	105	142	3	999	17
c115	c115.a1	c115.a1.a1	sp|Q8K1M6-2|DNM1L_MOUSE Isoform 2 of Dynamin-1-like protein OS=Mus musculus GN=Dnm1l	-152.483	51	80.1	716	142	0.658537	3.55551	18
c115	c115.a1	c115.a1.a2	sp|Q8K1M6|DNM1L_MOUSE Dynamin-1-like protein OS=Mus musculus GN=Dnm1l PE=1 SV=2	-152.483	49	82.5	742	142	0.642857	3.39397	18
c116	c116.a1	c116.a1.a1	sp|Q61166|MARE1_MOUSE Microtubule-associated protein RP/EB family member 1 OS=Mus musculus GN=Mapre1 PE=1 SV=3	-95.8233	61	29.9	268	141	1.90909	80.1131	18
c117	c117.a1	c117.a1.a1	sp|P35235|PTN11_MOUSE Tyrosine-protein phosphatase non-receptor type 11 OS=Mus musculus GN=Ptpn11 PE=1 SV=2	-121.186	49	68.3	597	138	0.774194	4.94557	18
c118	c118.a1	c118.a1.a1	sp|Q9WU78-3|PDC6I_MOUSE Isoform 3 of Programmed cell death 6-interacting protein OS=Mus musculus GN=Pdcd6ip	-137.902	40	96.6	874	138	0.560976	2.63895	18
c118	c118.a1	c118.a1.a2	sp|Q9WU78|PDC6I_MOUSE Programmed cell death 6-interacting protein OS=Mus musculus GN=Pdcd6ip PE=1 SV=3	-137.902	40	95.8	869	138	0.560976	2.63895	18
c119	c119.a1	c119.a1.a1	sp|O08529|CAN2_MOUSE Calpain-2 catalytic subunit OS=Mus musculus GN=Capn2 PE=1 SV=4	-123.985	39	79.7	700	137	0.961538	8.15247	18
c120	c120.a1	c120.a1.a1	sp|A2CG49-4|KALRN_MOUSE Isoform 4 of Kalirin OS=Mus musculus GN=Kalrn	-103.711	32	75.6	673	136	0.542857	2.49025	18
c121	c121.a1	c121.a1.a1	sp|P61205|ARF3_MOUSE ADP-ribosylation factor 3 OS=Mus musculus GN=Arf3 PE=2 SV=2	-62.903	54	20.5	181	103	1.875	73.9894	18
c121	c121.a1	c121.a1.a2	sp|P84078|ARF1_MOUSE ADP-ribosylation factor 1 OS=Mus musculus GN=Arf1 PE=1 SV=2	-62.903	54	20.6	181	103	1.875	73.9894	18
c121	c121.a2	c121.a2.a1	sp|P84084|ARF5_MOUSE ADP-ribosylation factor 5 OS=Mus musculus GN=Arf5 PE=1 SV=2	-56.4765	64	20.4	180	89	1.5	30.6228	18
c121	c121.a3	c121.a3.a1	sp|P61750|ARF4_MOUSE ADP-ribosylation factor 4 OS=Mus musculus GN=Arf4 PE=1 SV=2	-38.4607	50	20.3	180	61	1.25	16.7828	18
c122	c122.a1	c122.a1.a1	sp|P80318|TCPG_MOUSE T-complex protein 1 subunit gamma OS=Mus musculus GN=Cct3 PE=1 SV=1	-109.994	47	60.5	545	135	0.714286	4.17947	18
c123	c123.a1	c123.a1.a1	sp|Q99PT1|GDIR1_MOUSE Rho GDP-dissociation inhibitor 1 OS=Mus musculus GN=Arhgdia PE=1 SV=3	-84.9089	65	23.3	204	132	2.42857	267.27	18
c124	c124.a1	c124.a1.a1	sp|P01942|HBA_MOUSE Hemoglobin subunit alpha OS=Mus musculus GN=Hba PE=1 SV=2	-94.1953	58	15	142	131	3.4	2510.89	18
c125	c125.a1	c125.a1.a1	sp|Q9D1Q6|ERP44_MOUSE Endoplasmic reticulum resident protein 44 OS=Mus musculus GN=Erp44 PE=1 SV=1	-59.3662	33	46.7	406	81	0.6875	3.86968	18
c125	c125.a2	c125.a2.a1	sp|P63005|LIS1_MOUSE Platelet-activating factor acetylhydrolase IB subunit alpha OS=Mus musculus GN=Pafah1b1 PE=1 SV=2	-64.7228	34	46.5	410	55	0.777778	4.99484	18
c126	c126.a1	c126.a1.a1	sp|Q9R0P5|DEST_MOUSE Destrin OS=Mus musculus GN=Dstn PE=1 SV=3	-91.6315	75	18.4	165	131	1.8	62.0957	18
c127	c127.a1	c127.a1.a1	sp|Q07797|LG3BP_MOUSE Galectin-3-binding protein OS=Mus musculus GN=Lgals3bp PE=1 SV=1	-117.652	42	64.4	577	130	1	9	18
c128	c128.a1	c128.a1.a1	sp|Q8K1B8|URP2_MOUSE Fermitin family homolog 3 OS=Mus musculus GN=Fermt3 PE=1 SV=1	-123.812	53	75.5	665	128	0.722222	4.275	18
c129	c129.a1	c129.a1.a1	sp|Q91VI7|RINI_MOUSE Ribonuclease inhibitor OS=Mus musculus GN=Rnh1 PE=1 SV=1	-143.529	72	49.7	456	128	1	9	18
c130	c130.a1	c130.a1.a1	sp|Q60930|VDAC2_MOUSE Voltage-dependent anion-selective channel protein 2 OS=Mus musculus GN=Vdac2 PE=1 SV=2	-97.6682	60	31.6	295	127	1.07143	10.7877	18
c131	c131.a1	c131.a1.a1	sp|P80317|TCPZ_MOUSE T-complex protein 1 subunit zeta OS=Mus musculus GN=Cct6a PE=1 SV=3	-114.768	45	57.9	531	126	1	9	18
c131	c131.a2	c131.a2.a1	sp|Q61390|TCPW_MOUSE T-complex protein 1 subunit zeta-2 OS=Mus musculus GN=Cct6b PE=1 SV=4	-20.7878	12	58	531	27	0.227273	0.687612	17
c132	c132.a1	c132.a1.a1	sp|P01898|HA10_MOUSE H-2 class I histocompatibility antigen, Q10 alpha chain OS=Mus musculus GN=H2-Q10 PE=1 SV=3	-80.3069	46	37.1	325	77	1.06667	10.6591	18
c132	c132.a2	c132.a2.a1	sp|P01899|HA11_MOUSE H-2 class I histocompatibility antigen, D-B alpha chain OS=Mus musculus GN=H2-D1 PE=1 SV=2	-36.0647	25	40.7	362	63	0.444444	1.78256	18
c132	c132.a3	c132.a3.a1	sp|P01901|HA1B_MOUSE H-2 class I histocompatibility antigen, K-B alpha chain OS=Mus musculus GN=H2-K1 PE=1 SV=1	-21.3864	22	41.2	369	32	0.315789	1.06914	16
c132	c132.a4	c132.a4.a1	sp|P03991|HA1W_MOUSE H-2 class I histocompatibility antigen, K-W28 alpha chain OS=Mus musculus GN=H2-K1 PE=1 SV=2	-18.2391	17	41	368	31	0.263158	0.832981	16
c132	c132.a4	c132.a4.a2	sp|P14428|HA1Q_MOUSE H-2 class I histocompatibility antigen, K-Q alpha chain (Fragment) OS=Mus musculus GN=H2-K1 PE=1 SV=1	-18.2391	20	36.7	328	31	0.294118	0.968419	16
c133	c133.a1	c133.a1.a1	sp|P39054-2|DYN2_MOUSE Isoform 2 of Dynamin-2 OS=Mus musculus GN=Dnm2	-109.854	32	97.6	866	123	0.648649	3.45296	18
c133	c133.a1	c133.a1.a2	sp|P39054|DYN2_MOUSE Dynamin-2 OS=Mus musculus GN=Dnm2 PE=1 SV=2	-109.854	32	98	870	123	0.648649	3.45296	18
c133	c133.a2	c133.a2.a1	sp|P39053-3|DYN1_MOUSE Isoform 3 of Dynamin-1 OS=Mus musculus GN=Dnm1	-34.9751	11	95.8	851	39	0.243243	0.750827	18
c133	c133.a2	c133.a2.a2	sp|P39053-4|DYN1_MOUSE Isoform 4 of Dynamin-1 OS=Mus musculus GN=Dnm1	-34.9751	11	97.2	864	39	0.243243	0.750827	18
c133	c133.a2	c133.a2.a3	sp|P39053-5|DYN1_MOUSE Isoform 5 of Dynamin-1 OS=Mus musculus GN=Dnm1	-34.9751	11	95.9	851	39	0.243243	0.750827	18
c133	c133.a2	c133.a2.a4	sp|P39053|DYN1_MOUSE Dynamin-1 OS=Mus musculus GN=Dnm1 PE=1 SV=2	-34.9751	11	97.6	867	39	0.236842	0.725211	18
c134	c134.a1	c134.a1.a1	sp|P05480|SRC_MOUSE Neuronal proto-oncogene tyrosine-protein kinase Src OS=Mus musculus GN=Src PE=1 SV=4	-86.9168	37	60.5	541	123	0.615385	3.12463	18
c134	c134.a2	c134.a2.a1	sp|Q62190|RON_MOUSE Macrophage-stimulating protein receptor OS=Mus musculus GN=Mst1r PE=1 SV=3	-5.57414	2	150.3	1378	10	0.0377358	0.0907767	9
c135	c135.a1	c135.a1.a1	sp|Q9CVB6|ARPC2_MOUSE Actin-related protein 2/3 complex subunit 2 OS=Mus musculus GN=Arpc2 PE=1 SV=3	-79.9093	52	34.3	300	123	0.941176	7.73326	18
c136	c136.a1	c136.a1.a1	sp|P60335|PCBP1_MOUSE Poly(rC)-binding protein 1 OS=Mus musculus GN=Pcbp1 PE=1 SV=1	-87.2948	47	37.4	356	97	1.07143	10.7877	18
c136	c136.a2	c136.a2.a1	sp|Q61990-3|PCBP2_MOUSE Isoform 3 of Poly(rC)-binding protein 2 OS=Mus musculus GN=Pcbp2	-55.1354	37	36.7	349	61	0.785714	5.1054	18
c136	c136.a2	c136.a2.a2	sp|Q61990|PCBP2_MOUSE Poly(rC)-binding protein 2 OS=Mus musculus GN=Pcbp2 PE=1 SV=1	-55.1354	36	38.1	362	61	0.785714	5.1054	18
c137	c137.a1	c137.a1.a1	sp|P97315|CSRP1_MOUSE Cysteine and glycine-rich protein 1 OS=Mus musculus GN=Csrp1 PE=1 SV=3	-67.7126	55	20.5	193	122	1.09091	11.3285	18
c138	c138.a1	c138.a1.a1	sp|Q07076|ANXA7_MOUSE Annexin A7 OS=Mus musculus GN=Anxa7 PE=1 SV=2	-46.1059	28	49.8	463	86	0.789474	5.15848	18
c138	c138.a2	c138.a2.a1	sp|P97384|ANX11_MOUSE Annexin A11 OS=Mus musculus GN=Anxa11 PE=1 SV=2	-33.5619	19	54	503	35	0.470588	1.95521	17
c139	c139.a1	c139.a1.a1	sp|P24369|PPIB_MOUSE Peptidyl-prolyl cis-trans isomerase B OS=Mus musculus GN=Ppib PE=1 SV=2	-79.4146	57	23.6	216	120	1.77778	58.9484	18
c140	c140.a1	c140.a1.a1	sp|P40142|TKT_MOUSE Transketolase OS=Mus musculus GN=Tkt PE=1 SV=1	-97.2377	45	67.5	623	119	1.28571	18.307	18
c141	c141.a1	c141.a1.a1	sp|Q9JLJ2|AL9A1_MOUSE 4-trimethylaminobutyraldehyde dehydrogenase OS=Mus musculus GN=Aldh9a1 PE=1 SV=1	-75.5232	37	53.4	494	119	0.666667	3.64159	18
c142	c142.a1	c142.a1.a1	sp|P57776|EF1D_MOUSE Elongation factor 1-delta OS=Mus musculus GN=Eef1d PE=1 SV=3	-61.5224	42	31.2	281	98	0.5625	2.65174	18
c142	c142.a2	c142.a2.a1	sp|P57776-2|EF1D_MOUSE Isoform 2 of Elongation factor 1-delta OS=Mus musculus GN=Eef1d	-61.7529	45	28.6	257	93	0.666667	3.64159	18
c143	c143.a1	c143.a1.a1	sp|Q922B2|SYDC_MOUSE Aspartate--tRNA ligase, cytoplasmic OS=Mus musculus GN=Dars PE=1 SV=2	-97.6983	45	57	501	118	0.6	2.98107	18
c144	c144.a1	c144.a1.a1	sp|Q921H8|THIKA_MOUSE 3-ketoacyl-CoA thiolase A, peroxisomal OS=Mus musculus GN=Acaa1a PE=1 SV=1	-82.3281	45	43.8	424	118	0.941176	7.73326	18
c145	c145.a1	c145.a1.a1	sp|Q8BGG7|UBS3B_MOUSE Ubiquitin-associated and SH3 domain-containing protein B OS=Mus musculus GN=Ubash3b PE=1 SV=1	-123.889	41	71.3	638	117	1.04348	10.053	18
c146	c146.a1	c146.a1.a1	sp|Q9CWJ9|PUR9_MOUSE Bifunctional purine biosynthesis protein PURH OS=Mus musculus GN=Atic PE=1 SV=2	-101.126	41	64.1	592	117	0.709677	4.12481	18
c147	c147.a1	c147.a1.a1	sp|P35700|PRDX1_MOUSE Peroxiredoxin-1 OS=Mus musculus GN=Prdx1 PE=1 SV=1	-53.8329	50	22.1	199	99	1.27273	17.7382	18
c147	c147.a2	c147.a2.a1	sp|O08807|PRDX4_MOUSE Peroxiredoxin-4 OS=Mus musculus GN=Prdx4 PE=1 SV=1	-27.6222	33	30.9	274	56	0.538462	2.45511	18
c148	c148.a1	c148.a1.a1	sp|Q9JHJ0|TMOD3_MOUSE Tropomodulin-3 OS=Mus musculus GN=Tmod3 PE=1 SV=1	-96.5093	49	39.4	352	115	1.1875	14.3993	18
c149	c149.a1	c149.a1.a1	sp|P35278|RAB5C_MOUSE Ras-related protein Rab-5C OS=Mus musculus GN=Rab5c PE=1 SV=2	-58.0611	47	23.3	216	80	1	9	18
c149	c149.a2	c149.a2.a1	sp|P61021|RAB5B_MOUSE Ras-related protein Rab-5B OS=Mus musculus GN=Rab5b PE=1 SV=1	-36.1737	35	23.6	215	36	0.666667	3.64159	17
c149	c149.a3	c149.a3.a1	sp|Q9CQD1|RAB5A_MOUSE Ras-related protein Rab-5A OS=Mus musculus GN=Rab5a PE=1 SV=1	-35.1985	41	23.5	215	25	0.888889	6.74264	13
c150	c150.a1	c150.a1.a1	sp|P42208|SEPT2_MOUSE Septin-2 OS=Mus musculus GN=Sept2 PE=1 SV=2	-101.701	62	41.4	361	115	1.11765	12.1113	18
c151	c151.a1	c151.a1.a1	sp|Q60790|RASA3_MOUSE Ras GTPase-activating protein 3 OS=Mus musculus GN=Rasa3 PE=1 SV=2	-123.889	37	95.8	834	114	0.488889	2.0824	18
c152	c152.a1	c152.a1.a1	sp|P35282|RAB21_MOUSE Ras-related protein Rab-21 OS=Mus musculus GN=Rab21 PE=1 SV=4	-57.941	42	24	222	60	0.846154	6.01704	17
c152	c152.a2	c152.a2.a1	sp|P35293|RAB18_MOUSE Ras-related protein Rab-18 OS=Mus musculus GN=Rab18 PE=1 SV=2	-56.782	61	22.9	206	59	0.769231	4.87802	18
c153	c153.a1	c153.a1.a1	sp|O08553|DPYL2_MOUSE Dihydropyrimidinase-related protein 2 OS=Mus musculus GN=Dpysl2 PE=1 SV=2	-111.518	48	62.1	572	112	0.769231	4.87802	18
c154	c154.a1	c154.a1.a1	sp|P02535-3|K1C10_MOUSE Isoform 3 of Keratin, type I cytoskeletal 10 OS=Mus musculus GN=Krt10	-40.9661	20	49.4	462	75	0.47619	1.99358	18
c154	c154.a2	c154.a2.a1	sp|P02535-2|K1C10_MOUSE Isoform 2 of Keratin, type I cytoskeletal 10 OS=Mus musculus GN=Krt10	-40.8112	22	56.9	561	73	0.454545	1.84804	18
c154	c154.a2	c154.a2.a2	sp|P02535|K1C10_MOUSE Keratin, type I cytoskeletal 10 OS=Mus musculus GN=Krt10 PE=1 SV=3	-40.8112	21	57.6	570	73	0.454545	1.84804	18
c154	c154.a3	c154.a3.a1	sp|Q61781|K1C14_MOUSE Keratin, type I cytoskeletal 14 OS=Mus musculus GN=Krt14 PE=1 SV=2	-38.7413	19	52.7	484	43	0.36	1.29087	16
c154	c154.a4	c154.a4.a1	sp|Q9Z2K1|K1C16_MOUSE Keratin, type I cytoskeletal 16 OS=Mus musculus GN=Krt16 PE=1 SV=3	-24.1113	16	51.5	469	29	0.28	0.905461	16
c154	c154.a5	c154.a5.a1	sp|Q9QWL7|K1C17_MOUSE Keratin, type I cytoskeletal 17 OS=Mus musculus GN=Krt17 PE=1 SV=3	-24.4295	15	48	433	26	0.291667	0.957342	11
c154	c154.a6	c154.a6.a1	sp|Q6IFX2|K1C42_MOUSE Keratin, type I cytoskeletal 42 OS=Mus musculus GN=Krt42 PE=1 SV=1	-32.8642	19	50	452	18	0.32	1.0893	7
c154	c154.a7	c154.a7.a1	sp|A1L317|K1C24_MOUSE Keratin, type I cytoskeletal 24 OS=Mus musculus GN=Krt24 PE=2 SV=2	-4.44806	4	53.9	512	5	0.0833333	0.211528	4
c155	c155.a1	c155.a1.a1	sp|O35643|AP1B1_MOUSE AP-1 complex subunit beta-1 OS=Mus musculus GN=Ap1b1 PE=1 SV=2	-89.6798	26	103.7	943	93	0.552632	2.5697	18
c155	c155.a2	c155.a2.a1	sp|Q9DBG3-2|AP2B1_MOUSE Isoform 2 of AP-2 complex subunit beta OS=Mus musculus GN=Ap2b1	-64.8727	19	105.5	951	74	0.473684	1.97635	18
c155	c155.a2	c155.a2.a2	sp|Q9DBG3|AP2B1_MOUSE AP-2 complex subunit beta OS=Mus musculus GN=Ap2b1 PE=1 SV=1	-64.8727	19	104.4	937	74	0.473684	1.97635	18
c156	c156.a1	c156.a1.a1	sp|Q76MZ3|2AAA_MOUSE Serine/threonine-protein phosphatase 2A 65 kDa regulatory subunit A alpha isoform OS=Mus musculus GN=Ppp2r1a PE=1 SV=3	-102.497	43	65.2	589	108	0.7	4.01187	18
c156	c156.a2	c156.a2.a1	sp|Q7TNP2|2AAB_MOUSE Serine/threonine-protein phosphatase 2A 65 kDa regulatory subunit A beta isoform OS=Mus musculus GN=Ppp2r1b PE=1 SV=2	-38.5958	16	65.8	601	20	0.241379	0.743329	11
c157	c157.a1	c157.a1.a1	sp|Q9QUI0|RHOA_MOUSE Transforming protein RhoA OS=Mus musculus GN=Rhoa PE=1 SV=1	-76.3847	59	21.7	193	108	3	999	18
c157	c157.a2	c157.a2.a1	sp|P62746|RHOB_MOUSE Rho-related GTP-binding protein RhoB OS=Mus musculus GN=Rhob PE=1 SV=1	-21.1805	19	22	196	17	0.571429	2.72759	11
c158	c158.a1	c158.a1.a1	sp|Q60598|SRC8_MOUSE Src substrate cortactin OS=Mus musculus GN=Cttn PE=1 SV=2	-85.8299	33	61.1	546	107	0.695652	3.96195	18
c159	c159.a1	c159.a1.a1	sp|O09044|SNP23_MOUSE Synaptosomal-associated protein 23 OS=Mus musculus GN=Snap23 PE=1 SV=1	-87.1398	74	23.2	210	107	1.4	24.1189	18
c160	c160.a1	c160.a1.a1	sp|Q9DB77|QCR2_MOUSE Cytochrome b-c1 complex subunit 2, mitochondrial OS=Mus musculus GN=Uqcrc2 PE=1 SV=1	-69.1407	34	48.1	453	107	0.8125	5.49382	18
c161	c161.a1	c161.a1.a1	sp|B2RPV6|MMRN1_MOUSE Multimerin-1 OS=Mus musculus GN=Mmrn1 PE=1 SV=2	-93.9863	16	135.9	1210	106	0.381818	1.4089	17
c162	c162.a1	c162.a1.a1	sp|P60843|IF4A1_MOUSE Eukaryotic initiation factor 4A-I OS=Mus musculus GN=Eif4a1 PE=1 SV=1	-98.5007	54	46	406	103	0.952381	7.96151	18
c162	c162.a2	c162.a2.a1	sp|P10630-2|IF4A2_MOUSE Isoform 2 of Eukaryotic initiation factor 4A-II OS=Mus musculus GN=Eif4a2	-46.7451	24	46.4	408	69	0.380952	1.4041	18
c162	c162.a2	c162.a2.a2	sp|P10630|IF4A2_MOUSE Eukaryotic initiation factor 4A-II OS=Mus musculus GN=Eif4a2 PE=1 SV=2	-46.7451	24	46.3	407	69	0.380952	1.4041	18
c162	c162.a3	c162.a3.a1	sp|Q91VC3|IF4A3_MOUSE Eukaryotic initiation factor 4A-III OS=Mus musculus GN=Eif4a3 PE=1 SV=3	-14.7786	8	46.7	411	21	0.15	0.412538	14
c163	c163.a1	c163.a1.a1	sp|Q80TH2-1|ERBIN_MOUSE Isoform 1 of Erbin OS=Mus musculus GN=Erbin	-103.424	17	154.1	1376	106	0.289855	0.949194	18
c163	c163.a1	c163.a1.a2	sp|Q80TH2-2|ERBIN_MOUSE Isoform 2 of Erbin OS=Mus musculus GN=Erbin	-103.424	16	161.9	1450	106	0.27027	0.863246	18
c163	c163.a1	c163.a1.a3	sp|Q80TH2|ERBIN_MOUSE Erbin OS=Mus musculus GN=Erbin PE=1 SV=3	-103.424	17	157	1402	106	0.28169	0.912891	18
c164	c164.a1	c164.a1.a1	sp|P80313|TCPH_MOUSE T-complex protein 1 subunit eta OS=Mus musculus GN=Cct7 PE=1 SV=1	-96.1858	41	59.5	544	106	0.952381	7.96151	18
c165	c165.a1	c165.a1.a1	sp|Q62261|SPTB2_MOUSE Spectrin beta chain, non-erythrocytic 1 OS=Mus musculus GN=Sptbn1 PE=1 SV=2	-136.94	18	273.8	2363	105	0.246032	0.762105	17
c166	c166.a1	c166.a1.a1	sp|P43277|H13_MOUSE Histone H1.3 OS=Mus musculus GN=Hist1h1d PE=1 SV=2	-64.0942	27	22	221	50	2.75	561.341	12
c166	c166.a2	c166.a2.a1	sp|P15864|H12_MOUSE Histone H1.2 OS=Mus musculus GN=Hist1h1c PE=1 SV=2	-79.2268	32	21.2	212	49	3	999	12
c166	c166.a3	c166.a3.a1	sp|P43274|H14_MOUSE Histone H1.4 OS=Mus musculus GN=Hist1h1e PE=1 SV=2	-58.8722	28	21.9	219	42	3	999	12
c166	c166.a4	c166.a4.a1	sp|P43275|H11_MOUSE Histone H1.1 OS=Mus musculus GN=Hist1h1a PE=1 SV=2	-56.2752	34	21.7	213	31	2.25	176.828	12
c166	c166.a5	c166.a5.a1	sp|P43276|H15_MOUSE Histone H1.5 OS=Mus musculus GN=Hist1h1b PE=1 SV=2	-38.0362	25	22.5	223	20	2	99	5
c167	c167.a1	c167.a1.a1	sp|Q9JKR6|HYOU1_MOUSE Hypoxia up-regulated protein 1 OS=Mus musculus GN=Hyou1 PE=1 SV=1	-129.511	33	111	999	103	0.710526	4.13483	17
c168	c168.a1	c168.a1.a1	sp|Q9DCN2|NB5R3_MOUSE NADH-cytochrome b5 reductase 3 OS=Mus musculus GN=Cyb5r3 PE=1 SV=3	-76.3268	66	34	301	102	1.46154	27.9427	18
c169	c169.a1	c169.a1.a1	sp|Q3UND0-2|SKAP2_MOUSE Isoform 2 of Src kinase-associated phosphoprotein 2 OS=Mus musculus GN=Skap2	-83.9059	62	39.8	351	102	0.933333	7.57696	18
c169	c169.a1	c169.a1.a2	sp|Q3UND0|SKAP2_MOUSE Src kinase-associated phosphoprotein 2 OS=Mus musculus GN=Skap2 PE=1 SV=2	-83.9059	61	40.6	358	102	0.933333	7.57696	18
c170	c170.a1	c170.a1.a1	sp|Q9R0P3|ESTD_MOUSE S-formylglutathione hydrolase OS=Mus musculus GN=Esd PE=1 SV=1	-94.8347	67	31.2	282	102	1.9	78.4328	18
c171	c171.a1	c171.a1.a1	sp|Q9Z0P5|TWF2_MOUSE Twinfilin-2 OS=Mus musculus GN=Twf2 PE=1 SV=1	-86.793	45	39.4	349	102	0.736842	4.45559	18
c172	c172.a1	c172.a1.a1	sp|Q60864|STIP1_MOUSE Stress-induced-phosphoprotein 1 OS=Mus musculus GN=Stip1 PE=1 SV=1	-91.2609	38	62.4	543	101	0.7	4.01187	18
c173	c173.a1	c173.a1.a1	sp|O35598|ADA10_MOUSE Disintegrin and metalloproteinase domain-containing protein 10 OS=Mus musculus GN=Adam10 PE=1 SV=2	-76.0882	25	83.8	749	100	0.470588	1.95521	18
c174	c174.a1	c174.a1.a1	sp|Q6ZPJ3|UBE2O_MOUSE (E3-independent) E2 ubiquitin-conjugating enzyme UBE2O OS=Mus musculus GN=Ube2o PE=1 SV=3	-93.8231	21	140.6	1288	100	0.413043	1.58847	17
c175	c175.a1	c175.a1.a1	sp|O08709|PRDX6_MOUSE Peroxiredoxin-6 OS=Mus musculus GN=Prdx6 PE=1 SV=3	-70.7498	51	24.8	224	100	0.928571	7.48343	18
c176	c176.a1	c176.a1.a1	sp|P39876|TIMP3_MOUSE Metalloproteinase inhibitor 3 OS=Mus musculus GN=Timp3 PE=1 SV=1	-73.4486	54	24.1	211	98	2	99	18
c177	c177.a1	c177.a1.a1	sp|P24668|MPRD_MOUSE Cation-dependent mannose-6-phosphate receptor OS=Mus musculus GN=M6pr PE=1 SV=1	-58.5287	38	31.1	278	97	0.769231	4.87802	18
c178	c178.a1	c178.a1.a1	sp|Q01768|NDKB_MOUSE Nucleoside diphosphate kinase B OS=Mus musculus GN=Nme2 PE=1 SV=1	-43.2126	50	17.3	152	88	1	9	18
c178	c178.a2	c178.a2.a1	sp|P15532|NDKA_MOUSE Nucleoside diphosphate kinase A OS=Mus musculus GN=Nme1 PE=1 SV=1	-38.4131	55	17.1	152	75	1	9	18
c179	c179.a1	c179.a1.a1	sp|Q9Z0U1|ZO2_MOUSE Tight junction protein ZO-2 OS=Mus musculus GN=Tjp2 PE=1 SV=2	-94.0185	28	131.1	1167	97	0.52	2.31131	18
c180	c180.a1	c180.a1.a1	sp|P54116|STOM_MOUSE Erythrocyte band 7 integral membrane protein OS=Mus musculus GN=Stom PE=1 SV=3	-64.9282	43	31.3	284	97	0.928571	7.48343	18
c181	c181.a1	c181.a1.a1	sp|Q8QZS1|HIBCH_MOUSE 3-hydroxyisobutyryl-CoA hydrolase, mitochondrial OS=Mus musculus GN=Hibch PE=1 SV=1	-91.6321	53	42.9	385	97	0.818182	5.57933	18
c182	c182.a1	c182.a1.a1	sp|P56400|GP1BB_MOUSE Platelet glycoprotein Ib beta chain OS=Mus musculus GN=Gp1bb PE=1 SV=1	-66.2035	34	21.7	206	96	2.5	315.228	18
c183	c183.a1	c183.a1.a1	sp|P62806|H4_MOUSE Histone H4 OS=Mus musculus GN=Hist1h4a PE=1 SV=2	-66.1471	52	11.3	103	95	2.4	250.189	16
c184	c184.a1	c184.a1.a1	sp|P05202|AATM_MOUSE Aspartate aminotransferase, mitochondrial OS=Mus musculus GN=Got2 PE=1 SV=1	-68.0796	25	47.3	430	95	0.5	2.16228	18
c185	c185.a1	c185.a1.a1	sp|P61979-2|HNRPK_MOUSE Isoform 2 of Heterogeneous nuclear ribonucleoprotein K OS=Mus musculus GN=Hnrnpk	-89.7343	40	50.9	464	94	0.789474	5.15848	18
c185	c185.a1	c185.a1.a2	sp|P61979-3|HNRPK_MOUSE Isoform 3 of Heterogeneous nuclear ribonucleoprotein K OS=Mus musculus GN=Hnrnpk	-89.7343	42	48.4	439	94	0.789474	5.15848	18
c185	c185.a1	c185.a1.a3	sp|P61979|HNRPK_MOUSE Heterogeneous nuclear ribonucleoprotein K OS=Mus musculus GN=Hnrnpk PE=1 SV=1	-89.7343	40	50.9	463	94	0.833333	5.81292	18
c186	c186.a1	c186.a1.a1	sp|O88456|CPNS1_MOUSE Calpain small subunit 1 OS=Mus musculus GN=Capns1 PE=1 SV=1	-76.2231	63	28.4	269	94	2	99	18
c187	c187.a1	c187.a1.a1	sp|Q8BHN3|GANAB_MOUSE Neutral alpha-glucosidase AB OS=Mus musculus GN=Ganab PE=1 SV=1	-78.4282	22	106.7	944	92	0.552632	2.5697	18
c187	c187.a2	c187.a2.a1	sp|Q8BHN3-2|GANAB_MOUSE Isoform 2 of Neutral alpha-glucosidase AB OS=Mus musculus GN=Ganab	-75.5729	22	109.2	966	92	0.538462	2.45511	18
c188	c188.a1	c188.a1.a1	sp|P25911-2|LYN_MOUSE Isoform 2 of Tyrosine-protein kinase Lyn OS=Mus musculus GN=Lyn	-74.5429	35	56.2	491	92	0.826087	5.70019	18
c189	c189.a1	c189.a1.a1	sp|P29699|FETUA_MOUSE Alpha-2-HS-glycoprotein OS=Mus musculus GN=Ahsg PE=1 SV=1	-74.1941	44	37.2	345	91	2	99	17
c190	c190.a1	c190.a1.a1	sp|Q9CZ13|QCR1_MOUSE Cytochrome b-c1 complex subunit 1, mitochondrial OS=Mus musculus GN=Uqcrc1 PE=1 SV=2	-80.8801	45	52.7	480	91	1.28571	18.307	18
c191	c191.a1	c191.a1.a1	sp|P97371|PSME1_MOUSE Proteasome activator complex subunit 1 OS=Mus musculus GN=Psme1 PE=1 SV=2	-68.3075	50	28.6	249	89	0.866667	6.35642	18
c192	c192.a1	c192.a1.a1	sp|Q9D0K2|SCOT1_MOUSE Succinyl-CoA:3-ketoacid coenzyme A transferase 1, mitochondrial OS=Mus musculus GN=Oxct1 PE=1 SV=1	-97.0002	42	55.9	520	89	1.11765	12.1113	18
c193	c193.a1	c193.a1.a1	sp|Q00612|G6PD1_MOUSE Glucose-6-phosphate 1-dehydrogenase X OS=Mus musculus GN=G6pdx PE=1 SV=3	-85.5081	42	59.1	515	89	0.645161	3.41734	18
c194	c194.a1	c194.a1.a1	sp|Q9DBJ1|PGAM1_MOUSE Phosphoglycerate mutase 1 OS=Mus musculus GN=Pgam1 PE=1 SV=3	-77.7963	47	28.7	254	88	1.27273	17.7382	18
c195	c195.a1	c195.a1.a1	sp|Q60787|LCP2_MOUSE Lymphocyte cytosolic protein 2 OS=Mus musculus GN=Lcp2 PE=1 SV=2	-59.762	32	60.1	533	55	0.842105	5.95193	18
c195	c195.a2	c195.a2.a1	sp|Q8CIH5|PLCG2_MOUSE 1-phosphatidylinositol 4,5-bisphosphate phosphodiesterase gamma-2 OS=Mus musculus GN=Plcg2 PE=1 SV=1	-40.9161	10	147.4	1265	21	0.180328	0.514704	9
c195	c195.a3	c195.a3.a1	sp|P26450|P85A_MOUSE Phosphatidylinositol 3-kinase regulatory subunit alpha OS=Mus musculus GN=Pik3r1 PE=1 SV=2	-21.0593	12	83.4	724	14	0.193548	0.561523	10
c196	c196.a1	c196.a1.a1	sp|Q99LC5|ETFA_MOUSE Electron transfer flavoprotein subunit alpha, mitochondrial OS=Mus musculus GN=Etfa PE=1 SV=2	-85.0033	59	34.9	333	88	1	9	18
c197	c197.a1	c197.a1.a1	sp|Q8CG19|LTBP1_MOUSE Latent-transforming growth factor beta-binding protein 1 OS=Mus musculus GN=Ltbp1 PE=1 SV=2	-103.682	17	186.4	1712	87	0.370968	1.34946	18
c198	c198.a1	c198.a1.a1	sp|P97807-2|FUMH_MOUSE Isoform Cytoplasmic of Fumarate hydratase, mitochondrial OS=Mus musculus GN=Fh	-71.9533	32	49.9	467	87	0.666667	3.64159	18
c198	c198.a1	c198.a1.a2	sp|P97807|FUMH_MOUSE Fumarate hydratase, mitochondrial OS=Mus musculus GN=Fh PE=1 SV=3	-71.9533	29	54.2	507	87	0.631579	3.28133	18
c199	c199.a1	c199.a1.a1	sp|P61161|ARP2_MOUSE Actin-related protein 2 OS=Mus musculus GN=Actr2 PE=1 SV=1	-85.5232	42	44.6	394	86	1.14286	12.895	18
c200	c200.a1	c200.a1.a1	sp|Q8BWT1|THIM_MOUSE 3-ketoacyl-CoA thiolase, mitochondrial OS=Mus musculus GN=Acaa2 PE=1 SV=3	-94.5986	57	41.7	397	86	0.941176	7.73326	18
c201	c201.a1	c201.a1.a1	sp|Q9R0N0|GALK1_MOUSE Galactokinase OS=Mus musculus GN=Galk1 PE=1 SV=2	-67.4919	34	42.2	392	86	0.857143	6.19686	18
c202	c202.a1	c202.a1.a1	sp|A6X935|ITIH4_MOUSE Inter alpha-trypsin inhibitor, heavy chain 4 OS=Mus musculus GN=Itih4 PE=1 SV=2	-108.407	31	104.5	942	86	0.578947	2.79269	18
c203	c203.a1	c203.a1.a1	sp|P23492|PNPH_MOUSE Purine nucleoside phosphorylase OS=Mus musculus GN=Pnp PE=1 SV=2	-57.5117	48	32.2	289	86	0.8	5.30957	18
c204	c204.a1	c204.a1.a1	sp|Q06890|CLUS_MOUSE Clusterin OS=Mus musculus GN=Clu PE=1 SV=1	-88.3497	36	51.5	448	85	1	9	18
c205	c205.a1	c205.a1.a1	sp|Q9D832|DNJB4_MOUSE DnaJ homolog subfamily B member 4 OS=Mus musculus GN=Dnajb4 PE=1 SV=1	-68.8925	39	37.7	337	82	1	9	18
c205	c205.a2	c205.a2.a1	sp|Q9QYJ3|DNJB1_MOUSE DnaJ homolog subfamily B member 1 OS=Mus musculus GN=Dnajb1 PE=1 SV=3	-11.289	13	38.1	340	9	0.25	0.778279	8
c206	c206.a1	c206.a1.a1	sp|P97429|ANXA4_MOUSE Annexin A4 OS=Mus musculus GN=Anxa4 PE=1 SV=4	-48.8575	27	35.8	319	60	0.4	1.51189	17
c206	c206.a2	c206.a2.a1	sp|P14824|ANXA6_MOUSE Annexin A6 OS=Mus musculus GN=Anxa6 PE=1 SV=3	-43.4733	17	75.7	673	35	0.257143	0.807769	13
c207	c207.a1	c207.a1.a1	sp|Q99KI0|ACON_MOUSE Aconitate hydratase, mitochondrial OS=Mus musculus GN=Aco2 PE=1 SV=1	-98.1633	35	85.3	780	85	0.645161	3.41734	18
c208	c208.a1	c208.a1.a1	sp|P36423|THAS_MOUSE Thromboxane-A synthase OS=Mus musculus GN=Tbxas1 PE=1 SV=2	-53.3588	22	60.3	533	85	0.5	2.16228	18
c209	c209.a1	c209.a1.a1	sp|Q08761|PROS_MOUSE Vitamin K-dependent protein S OS=Mus musculus GN=Pros1 PE=2 SV=1	-61.8696	24	74.8	675	84	0.782609	5.0619	18
c210	c210.a1	c210.a1.a1	sp|Q7TNG5-2|EMAL2_MOUSE Isoform 2 of Echinoderm microtubule-associated protein-like 2 OS=Mus musculus GN=Eml2	-69.9544	27	72.6	668	84	0.761905	4.77969	18
c210	c210.a1	c210.a1.a2	sp|Q7TNG5|EMAL2_MOUSE Echinoderm microtubule-associated protein-like 2 OS=Mus musculus GN=Eml2 PE=1 SV=1	-69.9544	28	70.6	649	84	0.727273	4.3367	18
c211	c211.a1	c211.a1.a1	sp|Q91VD9|NDUS1_MOUSE NADH-ubiquinone oxidoreductase 75 kDa subunit, mitochondrial OS=Mus musculus GN=Ndufs1 PE=1 SV=2	-75.1056	31	79.6	727	84	0.5	2.16228	18
c212	c212.a1	c212.a1.a1	sp|Q78ZA7|NP1L4_MOUSE Nucleosome assembly protein 1-like 4 OS=Mus musculus GN=Nap1l4 PE=1 SV=1	-55.8459	31	42.6	375	55	1.1	11.5893	17
c212	c212.a2	c212.a2.a1	sp|P28656|NP1L1_MOUSE Nucleosome assembly protein 1-like 1 OS=Mus musculus GN=Nap1l1 PE=1 SV=2	-52.6582	31	45.2	391	43	1.11111	11.9155	18
c213	c213.a1	c213.a1.a1	sp|Q8BH61|F13A_MOUSE Coagulation factor XIII A chain OS=Mus musculus GN=F13a1 PE=1 SV=3	-70.8134	24	83	732	83	0.548387	2.53498	17
c214	c214.a1	c214.a1.a1	sp|P26443|DHE3_MOUSE Glutamate dehydrogenase 1, mitochondrial OS=Mus musculus GN=Glud1 PE=1 SV=1	-69.6854	35	61.2	558	83	0.714286	4.17947	18
c215	c215.a1	c215.a1.a1	sp|Q8CAQ8-2|MIC60_MOUSE Isoform 2 of MICOS complex subunit Mic60 OS=Mus musculus GN=Immt	-99.4031	32	82.8	746	82	0.477273	2.00105	18
c215	c215.a1	c215.a1.a2	sp|Q8CAQ8|MIC60_MOUSE MICOS complex subunit Mic60 OS=Mus musculus GN=Immt PE=1 SV=1	-99.4031	31	83.7	757	82	0.477273	2.00105	18
c216	c216.a1	c216.a1.a1	sp|Q9EQK5|MVP_MOUSE Major vault protein OS=Mus musculus GN=Mvp PE=1 SV=4	-80.041	28	95.7	861	82	0.461538	1.89427	18
c217	c217.a1	c217.a1.a1	sp|Q0GNC1-3|INF2_MOUSE Isoform 2 of Inverted formin-2 OS=Mus musculus GN=Inf2	-124.956	22	137.3	1264	82	0.571429	2.72759	17
c217	c217.a1	c217.a1.a2	sp|Q0GNC1|INF2_MOUSE Inverted formin-2 OS=Mus musculus GN=Inf2 PE=1 SV=1	-124.956	22	138.3	1273	82	0.555556	2.59381	17
c218	c218.a1	c218.a1.a1	sp|Q9WUM4|COR1C_MOUSE Coronin-1C OS=Mus musculus GN=Coro1c PE=1 SV=2	-58.507	32	53	474	81	1	9	18
c219	c219.a1	c219.a1.a1	sp|P32037|GTR3_MOUSE Solute carrier family 2, facilitated glucose transporter member 3 OS=Mus musculus GN=Slc2a3 PE=1 SV=1	-50.8964	22	53.3	493	81	1.66667	45.4159	18
c220	c220.a1	c220.a1.a1	sp|Q8BWG8-2|ARRB1_MOUSE Isoform 1B of Beta-arrestin-1 OS=Mus musculus GN=Arrb1	-103.876	58	46.1	410	81	1.23529	16.1907	16
c220	c220.a1	c220.a1.a2	sp|Q8BWG8|ARRB1_MOUSE Beta-arrestin-1 OS=Mus musculus GN=Arrb1 PE=1 SV=1	-103.876	57	46.9	418	81	1.23529	16.1907	16
c221	c221.a1	c221.a1.a1	sp|P58252|EF2_MOUSE Elongation factor 2 OS=Mus musculus GN=Eef2 PE=1 SV=2	-84.6657	27	95.1	858	81	0.485714	2.05995	18
c222	c222.a1	c222.a1.a1	sp|Q8VHL0|UT1_MOUSE Urea transporter 1 OS=Mus musculus GN=Slc14a1 PE=1 SV=2	-54.7809	18	42	384	80	1.625	41.1697	18
c223	c223.a1	c223.a1.a1	sp|Q99P72|RTN4_MOUSE Reticulon-4 OS=Mus musculus GN=Rtn4 PE=1 SV=2	-69.3971	16	126.4	1162	80	0.323529	1.10634	18
c224	c224.a1	c224.a1.a1	sp|Q9QYC0|ADDA_MOUSE Alpha-adducin OS=Mus musculus GN=Add1 PE=1 SV=2	-79.0042	39	80.5	735	80	0.652174	3.48925	18
c225	c225.a1	c225.a1.a1	sp|Q8BFR5|EFTU_MOUSE Elongation factor Tu, mitochondrial OS=Mus musculus GN=Tufm PE=1 SV=1	-79.5313	45	49.4	452	79	0.68	3.7863	18
c226	c226.a1	c226.a1.a1	sp|P52760|UK114_MOUSE Ribonuclease UK114 OS=Mus musculus GN=Hrsp12 PE=1 SV=3	-51.3573	61	14.2	135	79	1.33333	20.5443	18
c227	c227.a1	c227.a1.a1	sp|Q61171|PRDX2_MOUSE Peroxiredoxin-2 OS=Mus musculus GN=Prdx2 PE=1 SV=3	-43.5061	37	21.7	198	79	1.125	12.3352	18
c228	c228.a1	c228.a1.a1	sp|Q91VR2|ATPG_MOUSE ATP synthase subunit gamma, mitochondrial OS=Mus musculus GN=Atp5c1 PE=1 SV=1	-43.9622	29	32.8	298	78	0.666667	3.64159	18
c229	c229.a1	c229.a1.a1	sp|Q9D2G2|ODO2_MOUSE Dihydrolipoyllysine-residue succinyltransferase component of 2-oxoglutarate dehydrogenase complex, mitochondrial OS=Mus musculus GN=Dlst PE=1 SV=1	-56.4617	37	48.9	454	78	0.777778	4.99484	18
c230	c230.a1	c230.a1.a1	sp|Q78PY7|SND1_MOUSE Staphylococcal nuclease domain-containing protein 1 OS=Mus musculus GN=Snd1 PE=1 SV=1	-106.036	33	101.9	910	78	0.533333	2.41455	17
c231	c231.a1	c231.a1.a1	sp|P99029-2|PRDX5_MOUSE Isoform Cytoplasmic+peroxisomal of Peroxiredoxin-5, mitochondrial OS=Mus musculus GN=Prdx5	-62.6233	72	16.9	162	78	1.33333	20.5443	18
c231	c231.a1	c231.a1.a2	sp|P99029|PRDX5_MOUSE Peroxiredoxin-5, mitochondrial OS=Mus musculus GN=Prdx5 PE=1 SV=2	-62.6233	55	21.8	210	78	1	9	18
c232	c232.a1	c232.a1.a1	sp|P20918|PLMN_MOUSE Plasminogen OS=Mus musculus GN=Plg PE=1 SV=3	-118.857	42	90.6	812	77	0.736842	4.45559	14
c233	c233.a1	c233.a1.a1	sp|P40240|CD9_MOUSE CD9 antigen OS=Mus musculus GN=Cd9 PE=1 SV=2	-47.007	30	25.2	226	77	3.33333	2153.43	18
c234	c234.a1	c234.a1.a1	sp|Q00623|APOA1_MOUSE Apolipoprotein A-I OS=Mus musculus GN=Apoa1 PE=1 SV=2	-76.0744	53	30.5	264	76	1.38462	23.2446	17
c235	c235.a1	c235.a1.a1	sp|P45952|ACADM_MOUSE Medium-chain specific acyl-CoA dehydrogenase, mitochondrial OS=Mus musculus GN=Acadm PE=1 SV=1	-60.2886	30	46.4	421	76	0.666667	3.64159	18
c236	c236.a1	c236.a1.a1	sp|P35821|PTN1_MOUSE Tyrosine-protein phosphatase non-receptor type 1 OS=Mus musculus GN=Ptpn1 PE=1 SV=2	-57.9827	32	49.5	432	76	0.5	2.16228	18
c237	c237.a1	c237.a1.a1	sp|P97447|FHL1_MOUSE Four and a half LIM domains protein 1 OS=Mus musculus GN=Fhl1 PE=1 SV=3	-62.1038	40	31.8	280	75	1	9	16
c238	c238.a1	c238.a1.a1	sp|P00920|CAH2_MOUSE Carbonic anhydrase 2 OS=Mus musculus GN=Ca2 PE=1 SV=4	-60.9798	45	28.9	260	75	1.09091	11.3285	17
c239	c239.a1	c239.a1.a1	sp|P01027|CO3_MOUSE Complement C3 OS=Mus musculus GN=C3 PE=1 SV=3	-93.6665	14	186.2	1663	75	0.223529	0.673129	15
c240	c240.a1	c240.a1.a1	sp|Q91X72|HEMO_MOUSE Hemopexin OS=Mus musculus GN=Hpx PE=1 SV=2	-74.1061	36	51.2	460	75	0.809524	5.44947	18
c241	c241.a1	c241.a1.a1	sp|Q9DB20|ATPO_MOUSE ATP synthase subunit O, mitochondrial OS=Mus musculus GN=Atp5o PE=1 SV=1	-54.1311	48	23.3	213	75	1.3	18.9526	18
c242	c242.a1	c242.a1.a1	sp|Q9D7X3|DUS3_MOUSE Dual specificity protein phosphatase 3 OS=Mus musculus GN=Dusp3 PE=1 SV=1	-51.6684	46	20.4	185	75	1.66667	45.4159	18
c243	c243.a1	c243.a1.a1	sp|P27661|H2AX_MOUSE Histone H2AX OS=Mus musculus GN=H2afx PE=1 SV=2	-65.6274	31	15.1	143	54	2.6	397.107	10
c243	c243.a2	c243.a2.a1	sp|P22752|H2A1_MOUSE Histone H2A type 1 OS=Mus musculus GN=Hist1h2ab PE=1 SV=3	-38.8995	35	14.1	130	52	2.5	315.228	15
c243	c243.a2	c243.a2.a2	sp|Q8BFU2|H2A3_MOUSE Histone H2A type 3 OS=Mus musculus GN=Hist3h2a PE=1 SV=3	-38.8995	35	14	130	52	2.5	315.228	15
c243	c243.a2	c243.a2.a3	sp|Q8CGP5|H2A1F_MOUSE Histone H2A type 1-F OS=Mus musculus GN=Hist1h2af PE=1 SV=3	-38.8995	35	14.1	130	52	2.5	315.228	15
c243	c243.a2	c243.a2.a4	sp|Q8CGP6|H2A1H_MOUSE Histone H2A type 1-H OS=Mus musculus GN=Hist1h2ah PE=1 SV=3	-38.8995	35	13.9	128	52	2.5	315.228	15
c243	c243.a2	c243.a2.a5	sp|Q8CGP7|H2A1K_MOUSE Histone H2A type 1-K OS=Mus musculus GN=Hist1h2ak PE=1 SV=3	-38.8995	35	14.1	130	52	2.5	315.228	15
c243	c243.a2	c243.a2.a6	sp|Q8R1M2|H2AJ_MOUSE Histone H2A.J OS=Mus musculus GN=H2afj PE=1 SV=1	-38.8995	35	14	129	52	2.5	315.228	15
c243	c243.a3	c243.a3.a1	sp|Q64523|H2A2C_MOUSE Histone H2A type 2-C OS=Mus musculus GN=Hist2h2ac PE=1 SV=3	-36.8995	35	13.9	129	49	2.25	176.828	14
c243	c243.a3	c243.a3.a2	sp|Q6GSS7|H2A2A_MOUSE Histone H2A type 2-A OS=Mus musculus GN=Hist2h2aa1 PE=1 SV=3	-36.8995	35	14	130	49	2.25	176.828	14
c243	c243.a4	c243.a4.a1	sp|P0C0S6|H2AZ_MOUSE Histone H2A.Z OS=Mus musculus GN=H2afz PE=1 SV=2	-16.4512	31	13.5	128	17	1.25	16.7828	9
c243	c243.a4	c243.a4.a2	sp|Q3THW5|H2AV_MOUSE Histone H2A.V OS=Mus musculus GN=H2afv PE=1 SV=3	-16.4512	31	13.4	128	17	1.25	16.7828	9
c244	c244.a1	c244.a1.a1	sp|P12388|PAI2_MOUSE Plasminogen activator inhibitor 2, macrophage OS=Mus musculus GN=Serpinb2 PE=1 SV=1	-80.8318	42	46.2	415	74	0.764706	4.81709	18
c245	c245.a1	c245.a1.a1	sp|P51174|ACADL_MOUSE Long-chain specific acyl-CoA dehydrogenase, mitochondrial OS=Mus musculus GN=Acadl PE=1 SV=2	-45.2122	17	47.8	430	74	0.5	2.16228	18
c246	c246.a1	c246.a1.a1	sp|P17710-3|HXK1_MOUSE Isoform HK1 of Hexokinase-1 OS=Mus musculus GN=Hk1	-95.8661	23	102.1	918	72	0.47619	1.99358	16
c246	c246.a1	c246.a1.a2	sp|P17710-4|HXK1_MOUSE Isoform HK1-SC of Hexokinase-1 OS=Mus musculus GN=Hk1	-95.8661	23	102.5	922	72	0.465116	1.91821	16
c246	c246.a1	c246.a1.a3	sp|P17710|HXK1_MOUSE Hexokinase-1 OS=Mus musculus GN=Hk1 PE=1 SV=3	-95.8661	22	108.1	974	72	0.434783	1.72134	16
c246	c246.a2	c246.a2.a1	sp|O08528|HXK2_MOUSE Hexokinase-2 OS=Mus musculus GN=Hk2 PE=1 SV=1	-9.42205	2	102.3	917	6	0.0434783	0.105295	4
c247	c247.a1	c247.a1.a1	sp|Q04447|KCRB_MOUSE Creatine kinase B-type OS=Mus musculus GN=Ckb PE=1 SV=1	-79.1005	41	42.6	381	74	0.764706	4.81709	18
c248	c248.a1	c248.a1.a1	sp|Q99KF1|TMED9_MOUSE Transmembrane emp24 domain-containing protein 9 OS=Mus musculus GN=Tmed9 PE=1 SV=2	-47.9989	41	27	235	67	1.08333	11.1153	18
c248	c248.a2	c248.a2.a1	sp|Q8R1V4|TMED4_MOUSE Transmembrane emp24 domain-containing protein 4 OS=Mus musculus GN=Tmed4 PE=1 SV=1	-18.1542	16	25.9	227	27	0.454545	1.84804	16
c249	c249.a1	c249.a1.a1	sp|Q9D3G5|STX11_MOUSE Syntaxin-11 OS=Mus musculus GN=Stx11 PE=1 SV=1	-65.1012	40	33.3	287	73	0.8	5.30957	18
c250	c250.a1	c250.a1.a1	sp|O08749|DLDH_MOUSE Dihydrolipoyl dehydrogenase, mitochondrial OS=Mus musculus GN=Dld PE=1 SV=2	-64.026	36	54.1	509	73	0.647059	3.43669	18
c251	c251.a1	c251.a1.a1	sp|Q6ZQI3|MLEC_MOUSE Malectin OS=Mus musculus GN=Mlec PE=1 SV=2	-46.2421	27	32.2	291	72	0.666667	3.64159	18
c252	c252.a1	c252.a1.a1	sp|P11276|FINC_MOUSE Fibronectin OS=Mus musculus GN=Fn1 PE=1 SV=4	-120.636	13	272.2	2477	72	0.27907	0.901384	10
c253	c253.a1	c253.a1.a1	sp|P48025|KSYK_MOUSE Tyrosine-protein kinase SYK OS=Mus musculus GN=Syk PE=1 SV=2	-73.2942	29	71.2	629	72	0.419355	1.62636	17
c254	c254.a1	c254.a1.a1	sp|Q9D1A2|CNDP2_MOUSE Cytosolic non-specific dipeptidase OS=Mus musculus GN=Cndp2 PE=1 SV=1	-52.1095	34	52.6	475	72	0.772727	4.92553	18
c255	c255.a1	c255.a1.a1	sp|Q8BH04|PCKGM_MOUSE Phosphoenolpyruvate carboxykinase [GTP], mitochondrial OS=Mus musculus GN=Pck2 PE=1 SV=1	-79.0255	25	70.4	640	72	0.40625	1.5483	18
c256	c256.a1	c256.a1.a1	sp|P70168|IMB1_MOUSE Importin subunit beta-1 OS=Mus musculus GN=Kpnb1 PE=1 SV=2	-74.2652	23	97	876	72	0.529412	2.38386	18
c257	c257.a1	c257.a1.a1	sp|P0CG49|UBB_MOUSE Polyubiquitin-B OS=Mus musculus GN=Ubb PE=2 SV=1	-26.1356	15	34.3	305	71	0.210526	0.623777	18
c257	c257.a1	c257.a1.a2	sp|P0CG50|UBC_MOUSE Polyubiquitin-C OS=Mus musculus GN=Ubc PE=1 SV=2	-26.1356	6	82.4	734	71	0.0833333	0.211528	18
c257	c257.a1	c257.a1.a3	sp|P62983|RS27A_MOUSE Ubiquitin-40S ribosomal protein S27a OS=Mus musculus GN=Rps27a PE=1 SV=2	-26.1356	29	17.9	156	71	0.666667	3.64159	18
c257	c257.a1	c257.a1.a4	sp|P62984|RL40_MOUSE Ubiquitin-60S ribosomal protein L40 OS=Mus musculus GN=Uba52 PE=1 SV=2	-26.1356	36	14.6	128	71	0.666667	3.64159	18
c258	c258.a1	c258.a1.a1	sp|P24270|CATA_MOUSE Catalase OS=Mus musculus GN=Cat PE=1 SV=4	-73.4276	42	59.7	527	71	0.555556	2.59381	18
c259	c259.a1	c259.a1.a1	sp|O70325-2|GPX41_MOUSE Isoform Cytoplasmic of Phospholipid hydroperoxide glutathione peroxidase, mitochondrial OS=Mus musculus GN=Gpx4	-42.948	45	19.3	170	71	1	9	18
c259	c259.a1	c259.a1.a2	sp|O70325|GPX41_MOUSE Phospholipid hydroperoxide glutathione peroxidase, mitochondrial OS=Mus musculus GN=Gpx4 PE=1 SV=4	-42.948	38	22	197	71	0.9	6.94328	18
c260	c260.a1	c260.a1.a1	sp|P21614|VTDB_MOUSE Vitamin D-binding protein OS=Mus musculus GN=Gc PE=1 SV=2	-112.627	48	53.5	476	71	1.11765	12.1113	17
c261	c261.a1	c261.a1.a1	sp|Q3TJD7|PDLI7_MOUSE PDZ and LIM domain protein 7 OS=Mus musculus GN=Pdlim7 PE=1 SV=1	-64.5864	51	50	457	70	0.789474	5.15848	18
c262	c262.a1	c262.a1.a1	sp|P14152|MDHC_MOUSE Malate dehydrogenase, cytoplasmic OS=Mus musculus GN=Mdh1 PE=1 SV=3	-55.5857	41	36.4	334	70	0.909091	7.11131	18
c263	c263.a1	c263.a1.a1	sp|Q99KR7|PPIF_MOUSE Peptidyl-prolyl cis-trans isomerase F, mitochondrial OS=Mus musculus GN=Ppif PE=1 SV=1	-69.8825	46	21.6	206	70	1.5	30.6228	17
c264	c264.a1	c264.a1.a1	sp|Q9JI11|STK4_MOUSE Serine/threonine-protein kinase 4 OS=Mus musculus GN=Stk4 PE=1 SV=1	-60.052	24	55.4	487	68	0.346154	1.21898	18
c264	c264.a2	c264.a2.a1	sp|Q9JI10|STK3_MOUSE Serine/threonine-protein kinase 3 OS=Mus musculus GN=Stk3 PE=1 SV=1	-33.3612	12	56.7	497	44	0.2	0.584893	18
c265	c265.a1	c265.a1.a1	sp|O54724|PTRF_MOUSE Polymerase I and transcript release factor OS=Mus musculus GN=Ptrf PE=1 SV=1	-74.8917	36	43.8	392	69	0.647059	3.43669	18
c266	c266.a1	c266.a1.a1	sp|P24549|AL1A1_MOUSE Retinal dehydrogenase 1 OS=Mus musculus GN=Aldh1a1 PE=1 SV=5	-69.2447	33	54.3	501	69	0.789474	5.15848	18
c267	c267.a1	c267.a1.a1	sp|P61164|ACTZ_MOUSE Alpha-centractin OS=Mus musculus GN=Actr1a PE=1 SV=1	-65.8755	39	42.5	376	67	0.625	3.21697	17
c267	c267.a2	c267.a2.a1	sp|Q8R5C5|ACTY_MOUSE Beta-centractin OS=Mus musculus GN=Actr1b PE=1 SV=1	-33.2849	24	42.2	376	27	0.428571	1.6827	16
c268	c268.a1	c268.a1.a1	sp|P29391|FRIL1_MOUSE Ferritin light chain 1 OS=Mus musculus GN=Ftl1 PE=1 SV=2	-57.2987	54	20.7	183	67	0.833333	5.81292	18
c269	c269.a1	c269.a1.a1	sp|O70469|DOK2_MOUSE Docking protein 2 OS=Mus musculus GN=Dok2 PE=1 SV=1	-63.1739	37	45.4	412	67	0.705882	4.08022	18
c270	c270.a1	c270.a1.a1	sp|Q9CZD3|SYG_MOUSE Glycine--tRNA ligase OS=Mus musculus GN=Gars PE=1 SV=1	-65.9199	20	81.7	729	67	0.363636	1.31013	17
c271	c271.a1	c271.a1.a1	sp|Q68FD5|CLH1_MOUSE Clathrin heavy chain 1 OS=Mus musculus GN=Cltc PE=1 SV=3	-83.887	15	191.3	1675	67	0.27027	0.863246	15
c272	c272.a1	c272.a1.a1	sp|Q6PDN3|MYLK_MOUSE Myosin light chain kinase, smooth muscle OS=Mus musculus GN=Mylk PE=1 SV=3	-48.909	8	212.6	1941	42	0.162791	0.454758	14
c272	c272.a2	c272.a2.a1	sp|P47811-3|MK14_MOUSE Isoform 3 of Mitogen-activated protein kinase 14 OS=Mus musculus GN=Mapk14	-36.7615	29	41.4	360	31	0.4375	1.73842	13
c272	c272.a2	c272.a2.a2	sp|P47811|MK14_MOUSE Mitogen-activated protein kinase 14 OS=Mus musculus GN=Mapk14 PE=1 SV=3	-36.7615	29	41.2	360	31	0.466667	1.92864	13
c273	c273.a1	c273.a1.a1	sp|Q9DBR7-2|MYPT1_MOUSE Isoform 2 of Protein phosphatase 1 regulatory subunit 12A OS=Mus musculus GN=Ppp1r12a	-91.1946	24	111.6	1004	66	0.525	2.34965	17
c273	c273.a1	c273.a1.a2	sp|Q9DBR7|MYPT1_MOUSE Protein phosphatase 1 regulatory subunit 12A OS=Mus musculus GN=Ppp1r12a PE=1 SV=2	-91.1946	23	114.8	1029	66	0.512195	2.25233	17
c274	c274.a1	c274.a1.a1	sp|Q8K124|PKHO2_MOUSE Pleckstrin homology domain-containing family O member 2 OS=Mus musculus GN=Plekho2 PE=1 SV=1	-70.9056	41	53.7	495	66	0.777778	4.99484	18
c275	c275.a1	c275.a1.a1	sp|Q9WTP6-2|KAD2_MOUSE Isoform 2 of Adenylate kinase 2, mitochondrial OS=Mus musculus GN=Ak2	-47.0547	49	25.5	232	49	1	9	17
c275	c275.a1	c275.a1.a2	sp|Q9WTP6|KAD2_MOUSE Adenylate kinase 2, mitochondrial OS=Mus musculus GN=Ak2 PE=1 SV=5	-47.0547	47	26.4	239	49	1	9	17
c275	c275.a2	c275.a2.a1	sp|Q9DBP5|KCY_MOUSE UMP-CMP kinase OS=Mus musculus GN=Cmpk1 PE=1 SV=1	-31.948	43	22.1	196	23	0.818182	5.57933	10
c276	c276.a1	c276.a1.a1	sp|Q99KH8|STK24_MOUSE Serine/threonine-protein kinase 24 OS=Mus musculus GN=Stk24 PE=1 SV=1	-69.0473	36	47.8	431	63	0.722222	4.275	18
c276	c276.a2	c276.a2.a1	sp|Q99JT2|STK26_MOUSE Serine/threonine-protein kinase 26 OS=Mus musculus GN=Stk26 PE=1 SV=1	-41.4914	20	46.5	416	28	0.421053	1.63665	11
c277	c277.a1	c277.a1.a1	sp|P14869|RLA0_MOUSE 60S acidic ribosomal protein P0 OS=Mus musculus GN=Rplp0 PE=1 SV=3	-53.3086	37	34.1	317	65	1	9	17
c278	c278.a1	c278.a1.a1	sp|P51150|RAB7A_MOUSE Ras-related protein Rab-7a OS=Mus musculus GN=Rab7a PE=1 SV=2	-61.4274	64	23.4	207	65	1.07692	10.9378	18
c279	c279.a1	c279.a1.a1	sp|P67778|PHB_MOUSE Prohibitin OS=Mus musculus GN=Phb PE=1 SV=1	-54.935	42	29.7	272	64	0.529412	2.38386	17
c280	c280.a1	c280.a1.a1	sp|Q9JM76|ARPC3_MOUSE Actin-related protein 2/3 complex subunit 3 OS=Mus musculus GN=Arpc3 PE=1 SV=3	-40.7741	41	20.4	178	64	1	9	18
c281	c281.a1	c281.a1.a1	sp|Q07417|ACADS_MOUSE Short-chain specific acyl-CoA dehydrogenase, mitochondrial OS=Mus musculus GN=Acads PE=1 SV=2	-69.0486	46	44.8	412	64	0.722222	4.275	17
c282	c282.a1	c282.a1.a1	sp|P29341|PABP1_MOUSE Polyadenylate-binding protein 1 OS=Mus musculus GN=Pabpc1 PE=1 SV=2	-53.2188	19	70.5	636	64	0.366667	1.32631	18
c283	c283.a1	c283.a1.a1	sp|Q99KK7|DPP3_MOUSE Dipeptidyl peptidase 3 OS=Mus musculus GN=Dpp3 PE=1 SV=2	-76.9485	27	82.7	738	64	0.419355	1.62636	18
c284	c284.a1	c284.a1.a1	sp|Q60597-3|ODO1_MOUSE Isoform 3 of 2-oxoglutarate dehydrogenase, mitochondrial OS=Mus musculus GN=Ogdh	-85.5919	23	118	1038	63	0.47619	1.99358	18
c284	c284.a1	c284.a1.a2	sp|Q60597|ODO1_MOUSE 2-oxoglutarate dehydrogenase, mitochondrial OS=Mus musculus GN=Ogdh PE=1 SV=3	-85.5919	23	116.2	1023	63	0.47619	1.99358	18
c285	c285.a1	c285.a1.a1	sp|Q8CI94|PYGB_MOUSE Glycogen phosphorylase, brain form OS=Mus musculus GN=Pygb PE=1 SV=3	-69.2922	20	96.6	843	53	0.390244	1.45609	18
c285	c285.a2	c285.a2.a1	sp|Q9WUB3|PYGM_MOUSE Glycogen phosphorylase, muscle form OS=Mus musculus GN=Pygm PE=1 SV=3	-25.5609	8	97.1	842	19	0.133333	0.359356	14
c285	c285.a3	c285.a3.a1	sp|Q9ET01|PYGL_MOUSE Glycogen phosphorylase, liver form OS=Mus musculus GN=Pygl PE=1 SV=4	-15.6359	7	97.3	850	7	0.097561	0.251875	4
c286	c286.a1	c286.a1.a1	sp|P70302|STIM1_MOUSE Stromal interaction molecule 1 OS=Mus musculus GN=Stim1 PE=1 SV=2	-57.1879	18	77.4	685	62	0.44	1.75423	18
c287	c287.a1	c287.a1.a1	sp|Q99KN9|EPN4_MOUSE Clathrin interactor 1 OS=Mus musculus GN=Clint1 PE=1 SV=2	-64.018	25	68.4	631	62	0.764706	4.81709	15
c288	c288.a1	c288.a1.a1	sp|Q9WV32|ARC1B_MOUSE Actin-related protein 2/3 complex subunit 1B OS=Mus musculus GN=Arpc1b PE=1 SV=4	-33.9314	27	40.9	372	38	0.571429	2.72759	17
c288	c288.a2	c288.a2.a1	sp|Q9R0Q6|ARC1A_MOUSE Actin-related protein 2/3 complex subunit 1A OS=Mus musculus GN=Arpc1a PE=1 SV=1	-28.1176	25	41.5	370	28	0.555556	2.59381	13
c289	c289.a1	c289.a1.a1	sp|Q9CZ44-3|NSF1C_MOUSE Isoform 3 of NSFL1 cofactor p47 OS=Mus musculus GN=Nsfl1c	-64.5055	32	40.8	372	62	0.45	1.81838	17
c289	c289.a1	c289.a1.a2	sp|Q9CZ44|NSF1C_MOUSE NSFL1 cofactor p47 OS=Mus musculus GN=Nsfl1c PE=1 SV=1	-64.5055	32	40.6	370	62	0.45	1.81838	17
c290	c290.a1	c290.a1.a1	sp|P10853|H2B1F_MOUSE Histone H2B type 1-F/J/L OS=Mus musculus GN=Hist1h2bf PE=1 SV=2	-46.3733	35	13.9	126	62	2	99	15
c290	c290.a1	c290.a1.a2	sp|P10854|H2B1M_MOUSE Histone H2B type 1-M OS=Mus musculus GN=Hist1h2bm PE=1 SV=2	-46.3733	35	13.9	126	62	2	99	15
c290	c290.a1	c290.a1.a3	sp|Q64475|H2B1B_MOUSE Histone H2B type 1-B OS=Mus musculus GN=Hist1h2bb PE=1 SV=3	-46.3733	35	13.9	126	62	2	99	15
c290	c290.a1	c290.a1.a4	sp|Q64478|H2B1H_MOUSE Histone H2B type 1-H OS=Mus musculus GN=Hist1h2bh PE=1 SV=3	-46.3733	35	13.8	126	62	2	99	15
c290	c290.a1	c290.a1.a5	sp|Q64525|H2B2B_MOUSE Histone H2B type 2-B OS=Mus musculus GN=Hist2h2bb PE=1 SV=3	-46.3733	35	13.8	126	62	2	99	15
c290	c290.a1	c290.a1.a6	sp|Q6ZWY9|H2B1C_MOUSE Histone H2B type 1-C/E/G OS=Mus musculus GN=Hist1h2bc PE=1 SV=3	-46.3733	35	13.8	126	62	2	99	15
c290	c290.a1	c290.a1.a7	sp|Q8CGP1|H2B1K_MOUSE Histone H2B type 1-K OS=Mus musculus GN=Hist1h2bk PE=1 SV=3	-46.3733	35	13.8	126	62	2	99	15
c290	c290.a1	c290.a1.a8	sp|Q8CGP2-2|H2B1P_MOUSE Isoform 2 of Histone H2B type 1-P OS=Mus musculus GN=Hist1h2bp	-46.3733	32	15.5	138	62	1.66667	45.4159	15
c290	c290.a1	c290.a1.a9	sp|Q8CGP2|H2B1P_MOUSE Histone H2B type 1-P OS=Mus musculus GN=Hist1h2bp PE=1 SV=3	-46.3733	35	13.9	126	62	2	99	15
c291	c291.a1	c291.a1.a1	sp|P62814|VATB2_MOUSE V-type proton ATPase subunit B, brain isoform OS=Mus musculus GN=Atp6v1b2 PE=1 SV=1	-53.9061	33	56.4	511	62	0.545455	2.51119	18
c292	c292.a1	c292.a1.a1	sp|Q9DCZ1|GMPR1_MOUSE GMP reductase 1 OS=Mus musculus GN=Gmpr PE=1 SV=1	-65.3791	39	37.4	345	61	0.923077	7.37678	16
c293	c293.a1	c293.a1.a1	sp|P51660|DHB4_MOUSE Peroxisomal multifunctional enzyme type 2 OS=Mus musculus GN=Hsd17b4 PE=1 SV=3	-82.1997	26	79.3	735	61	0.46875	1.94273	17
c294	c294.a1	c294.a1.a1	sp|Q91YR1|TWF1_MOUSE Twinfilin-1 OS=Mus musculus GN=Twf1 PE=1 SV=2	-53.0446	30	40	350	61	0.5	2.16228	18
c295	c295.a1	c295.a1.a1	sp|Q6P069-2|SORCN_MOUSE Isoform 2 of Sorcin OS=Mus musculus GN=Sri	-41.7441	51	20.2	183	61	0.818182	5.57933	17
c295	c295.a1	c295.a1.a2	sp|Q6P069|SORCN_MOUSE Sorcin OS=Mus musculus GN=Sri PE=1 SV=1	-41.7441	47	21.5	198	61	0.818182	5.57933	17
c296	c296.a1	c296.a1.a1	sp|P14206|RSSA_MOUSE 40S ribosomal protein SA OS=Mus musculus GN=Rpsa PE=1 SV=4	-58.973	34	32.7	295	61	0.818182	5.57933	18
c297	c297.a1	c297.a1.a1	sp|P50516|VATA_MOUSE V-type proton ATPase catalytic subunit A OS=Mus musculus GN=Atp6v1a PE=1 SV=2	-90.2165	38	68.2	617	61	0.689655	3.8939	16
c298	c298.a1	c298.a1.a1	sp|Q9R0Q1|SYTL4_MOUSE Synaptotagmin-like protein 4 OS=Mus musculus GN=Sytl4 PE=1 SV=1	-67.4774	22	75.9	673	61	0.419355	1.62636	18
c299	c299.a1	c299.a1.a1	sp|P08228|SODC_MOUSE Superoxide dismutase [Cu-Zn] OS=Mus musculus GN=Sod1 PE=1 SV=2	-55.3611	52	15.9	154	60	1	9	18
c300	c300.a1	c300.a1.a1	sp|Q8CIN4|PAK2_MOUSE Serine/threonine-protein kinase PAK 2 OS=Mus musculus GN=Pak2 PE=1 SV=1	-59.6898	31	57.8	524	60	0.391304	1.46209	18
c301	c301.a1	c301.a1.a1	sp|Q8BH43|WASF2_MOUSE Wiskott-Aldrich syndrome protein family member 2 OS=Mus musculus GN=Wasf2 PE=1 SV=1	-41.7197	27	53.9	497	60	0.818182	5.57933	18
c302	c302.a1	c302.a1.a1	sp|O08742|GPV_MOUSE Platelet glycoprotein V OS=Mus musculus GN=Gp5 PE=1 SV=1	-89.4584	28	63.3	567	60	0.823529	5.66085	18
c303	c303.a1	c303.a1.a1	sp|P06728|APOA4_MOUSE Apolipoprotein A-IV OS=Mus musculus GN=Apoa4 PE=1 SV=3	-86.8291	51	44.9	395	59	0.681818	3.80638	16
c304	c304.a1	c304.a1.a1	sp|O08756|HCD2_MOUSE 3-hydroxyacyl-CoA dehydrogenase type-2 OS=Mus musculus GN=Hsd17b10 PE=1 SV=4	-46.2057	47	27.3	261	59	0.769231	4.87802	18
c305	c305.a1	c305.a1.a1	sp|Q9CQE5|RGS10_MOUSE Regulator of G-protein signaling 10 OS=Mus musculus GN=Rgs10 PE=1 SV=1	-50.8865	47	21.1	181	58	1.25	16.7828	17
c306	c306.a1	c306.a1.a1	sp|Q08481-2|PECA1_MOUSE Isoform 2 of Platelet endothelial cell adhesion molecule OS=Mus musculus GN=Pecam1	-46.1769	21	77.8	697	58	0.37037	1.34623	18
c306	c306.a1	c306.a1.a2	sp|Q08481-3|PECA1_MOUSE Isoform 3 of Platelet endothelial cell adhesion molecule OS=Mus musculus GN=Pecam1	-46.1769	20	79.8	716	58	0.357143	1.27585	18
c306	c306.a1	c306.a1.a3	sp|Q08481|PECA1_MOUSE Platelet endothelial cell adhesion molecule OS=Mus musculus GN=Pecam1 PE=1 SV=1	-46.1769	20	81.1	727	58	0.344828	1.21222	18
c307	c307.a1	c307.a1.a1	sp|Q9R111|GUAD_MOUSE Guanine deaminase OS=Mus musculus GN=Gda PE=1 SV=1	-60.4276	30	50.9	454	58	0.52381	2.34048	17
c308	c308.a1	c308.a1.a1	sp|Q64455|PTPRJ_MOUSE Receptor-type tyrosine-protein phosphatase eta OS=Mus musculus GN=Ptprj PE=1 SV=2	-70.9734	16	136.5	1238	58	0.425	1.66073	15
c309	c309.a1	c309.a1.a1	sp|Q8C166|CPNE1_MOUSE Copine-1 OS=Mus musculus GN=Cpne1 PE=1 SV=1	-38.0073	16	58.8	536	58	0.625	3.21697	18
c310	c310.a1	c310.a1.a1	sp|O08808|DIAP1_MOUSE Protein diaphanous homolog 1 OS=Mus musculus GN=Diaph1 PE=1 SV=1	-112.689	25	139.1	1255	58	0.481481	2.03027	13
c311	c311.a1	c311.a1.a1	sp|Q99JY0|ECHB_MOUSE Trifunctional enzyme subunit beta, mitochondrial OS=Mus musculus GN=Hadhb PE=1 SV=1	-49.6586	27	51.3	475	58	0.578947	2.79269	18
c312	c312.a1	c312.a1.a1	sp|P63028|TCTP_MOUSE Translationally-controlled tumor protein OS=Mus musculus GN=Tpt1 PE=1 SV=1	-35.7207	51	19.4	172	57	2.2	157.489	18
c313	c313.a1	c313.a1.a1	sp|Q9WUX5-2|MRVI1_MOUSE Isoform 2 of Protein MRVI1 OS=Mus musculus GN=Mrvi1	-54.978	19	93	856	56	0.30303	1.00923	18
c313	c313.a1	c313.a1.a2	sp|Q9WUX5|MRVI1_MOUSE Protein MRVI1 OS=Mus musculus GN=Mrvi1 PE=1 SV=2	-54.978	18	97.3	899	56	0.30303	1.00923	18
c314	c314.a1	c314.a1.a1	sp|Q9WUM3|COR1B_MOUSE Coronin-1B OS=Mus musculus GN=Coro1b PE=1 SV=1	-66.1688	29	53.8	484	56	1	9	17
c315	c315.a1	c315.a1.a1	sp|Q9CZU6|CISY_MOUSE Citrate synthase, mitochondrial OS=Mus musculus GN=Cs PE=1 SV=1	-55.1108	22	51.6	464	56	0.529412	2.38386	18
c316	c316.a1	c316.a1.a1	sp|O09172|GSH0_MOUSE Glutamate--cysteine ligase regulatory subunit OS=Mus musculus GN=Gclm PE=1 SV=1	-43.6659	41	30.4	274	56	1.22222	15.681	17
c317	c317.a1	c317.a1.a1	sp|Q91YQ5|RPN1_MOUSE Dolichyl-diphosphooligosaccharide--protein glycosyltransferase subunit 1 OS=Mus musculus GN=Rpn1 PE=1 SV=1	-39.8412	20	68.4	608	55	0.37931	1.39503	15
c318	c318.a1	c318.a1.a1	sp|Q62418-2|DBNL_MOUSE Isoform 2 of Drebrin-like protein OS=Mus musculus GN=Dbnl	-55.1256	31	48.3	433	55	0.473684	1.97635	17
c318	c318.a1	c318.a1.a2	sp|Q62418-3|DBNL_MOUSE Isoform 3 of Drebrin-like protein OS=Mus musculus GN=Dbnl	-55.1256	31	48.2	432	55	0.473684	1.97635	17
c318	c318.a1	c318.a1.a3	sp|Q62418|DBNL_MOUSE Drebrin-like protein OS=Mus musculus GN=Dbnl PE=1 SV=2	-55.1256	31	48.6	436	55	0.45	1.81838	17
c319	c319.a1	c319.a1.a1	sp|O88792|JAM1_MOUSE Junctional adhesion molecule A OS=Mus musculus GN=F11r PE=1 SV=2	-55.9557	36	32.3	300	55	0.9	6.94328	18
c320	c320.a1	c320.a1.a1	sp|Q99KV1|DJB11_MOUSE DnaJ homolog subfamily B member 11 OS=Mus musculus GN=Dnajb11 PE=1 SV=1	-46.1996	29	40.4	358	55	0.833333	5.81292	17
c321	c321.a1	c321.a1.a1	sp|P62204|CALM_MOUSE Calmodulin OS=Mus musculus GN=Calm1 PE=1 SV=2	-69.2736	56	16.8	149	54	1.625	41.1697	14
c321	c321.a2	c321.a2.a1	sp|Q9D6P8|CALL3_MOUSE Calmodulin-like protein 3 OS=Mus musculus GN=Calml3 PE=2 SV=1	-28.8887	44	16.6	149	24	0.857143	6.19686	14
c322	c322.a1	c322.a1.a1	sp|Q9CPY7-2|AMPL_MOUSE Isoform 2 of Cytosol aminopeptidase OS=Mus musculus GN=Lap3	-56.1631	40	52.6	488	55	0.583333	2.83119	18
c322	c322.a1	c322.a1.a2	sp|Q9CPY7|AMPL_MOUSE Cytosol aminopeptidase OS=Mus musculus GN=Lap3 PE=1 SV=3	-56.1631	37	56	519	55	0.538462	2.45511	18
c323	c323.a1	c323.a1.a1	sp|Q9Z1Z0|USO1_MOUSE General vesicular transport factor p115 OS=Mus musculus GN=Uso1 PE=1 SV=2	-58.9015	16	106.8	959	55	0.371429	1.35195	15
c324	c324.a1	c324.a1.a1	sp|Q5XJY5|COPD_MOUSE Coatomer subunit delta OS=Mus musculus GN=Arcn1 PE=1 SV=2	-49.3185	25	57.1	511	54	0.545455	2.51119	17
c325	c325.a1	c325.a1.a1	sp|Q9Z0G0|GIPC1_MOUSE PDZ domain-containing protein GIPC1 OS=Mus musculus GN=Gipc1 PE=1 SV=1	-53.2967	44	36	333	54	0.923077	7.37678	17
c326	c326.a1	c326.a1.a1	sp|O88186|GPIX_MOUSE Platelet glycoprotein IX OS=Mus musculus GN=Gp9 PE=1 SV=1	-41.2364	43	19.6	177	54	2.25	176.828	15
c327	c327.a1	c327.a1.a1	sp|Q8BG32|PSD11_MOUSE 26S proteasome non-ATPase regulatory subunit 11 OS=Mus musculus GN=Psmd11 PE=1 SV=3	-41.5554	26	47.3	422	54	0.391304	1.46209	18
c328	c328.a1	c328.a1.a1	sp|P59999|ARPC4_MOUSE Actin-related protein 2/3 complex subunit 4 OS=Mus musculus GN=Arpc4 PE=1 SV=3	-32.984	41	19.6	168	53	1	9	18
c329	c329.a1	c329.a1.a1	sp|Q8R1Q8|DC1L1_MOUSE Cytoplasmic dynein 1 light intermediate chain 1 OS=Mus musculus GN=Dync1li1 PE=1 SV=1	-29.6225	14	56.5	523	46	0.2	0.584893	18
c329	c329.a2	c329.a2.a1	sp|Q6PDL0|DC1L2_MOUSE Cytoplasmic dynein 1 light intermediate chain 2 OS=Mus musculus GN=Dync1li2 PE=1 SV=2	-14.5996	9	54.1	492	15	0.125	0.333521	10
c330	c330.a1	c330.a1.a1	sp|Q8VC52|RBPS2_MOUSE RNA-binding protein with multiple splicing 2 OS=Mus musculus GN=Rbpms2 PE=1 SV=1	-29.3927	35	22.4	206	53	0.875	6.49894	18
c331	c331.a1	c331.a1.a1	sp|P28271|ACOC_MOUSE Cytoplasmic aconitate hydratase OS=Mus musculus GN=Aco1 PE=1 SV=3	-52.5785	19	97.9	889	53	0.277778	0.895736	18
c332	c332.a1	c332.a1.a1	sp|Q9QUM9|PSA6_MOUSE Proteasome subunit alpha type-6 OS=Mus musculus GN=Psma6 PE=1 SV=1	-53.0375	46	27.3	246	52	0.714286	4.17947	18
c333	c333.a1	c333.a1.a1	sp|Q6P1B1|XPP1_MOUSE Xaa-Pro aminopeptidase 1 OS=Mus musculus GN=Xpnpep1 PE=1 SV=1	-45.466	29	69.4	623	52	0.444444	1.78256	17
c334	c334.a1	c334.a1.a1	sp|O88685|PRS6A_MOUSE 26S protease regulatory subunit 6A OS=Mus musculus GN=Psmc3 PE=1 SV=2	-56.6795	34	49.4	442	52	0.565217	2.67466	18
c335	c335.a1	c335.a1.a1	sp|Q9DCW4|ETFB_MOUSE Electron transfer flavoprotein subunit beta OS=Mus musculus GN=Etfb PE=1 SV=3	-43.1625	41	27.5	255	51	0.75	4.62341	18
c336	c336.a1	c336.a1.a1	sp|Q3TBD2|HMHA1_MOUSE Minor histocompatibility protein HA-1 OS=Mus musculus GN=Hmha1 PE=1 SV=2	-80.1981	17	122.7	1116	51	0.451613	1.82887	18
c337	c337.a1	c337.a1.a1	sp|P63242|IF5A1_MOUSE Eukaryotic translation initiation factor 5A-1 OS=Mus musculus GN=Eif5a PE=1 SV=2	-66.379	59	16.7	154	51	2.75	561.341	17
c338	c338.a1	c338.a1.a1	sp|Q9JL99-2|CLC1B_MOUSE Isoform 2 of C-type lectin domain family 1 member B OS=Mus musculus GN=Clec1b	-42.9997	41	22.8	197	50	1	9	18
c338	c338.a1	c338.a1.a2	sp|Q9JL99|CLC1B_MOUSE C-type lectin domain family 1 member B OS=Mus musculus GN=Clec1b PE=1 SV=1	-42.9997	36	26.1	229	50	1	9	18
c339	c339.a1	c339.a1.a1	sp|Q9CZE3|RAB32_MOUSE Ras-related protein Rab-32 OS=Mus musculus GN=Rab32 PE=1 SV=3	-36.9544	33	25	223	45	0.538462	2.45511	15
c339	c339.a2	c339.a2.a1	sp|Q91YQ1|RAB7L_MOUSE Ras-related protein Rab-7L1 OS=Mus musculus GN=Rab29 PE=1 SV=1	-12.9851	13	23	204	6	0.166667	0.467799	4
c340	c340.a1	c340.a1.a1	sp|Q91YH5|ATLA3_MOUSE Atlastin-3 OS=Mus musculus GN=Atl3 PE=1 SV=1	-52.8722	33	60.4	541	49	0.521739	2.3246	15
c341	c341.a1	c341.a1.a1	sp|Q9D020-1|5NT3A_MOUSE Isoform 1 of Cytosolic 5'-nucleotidase 3A OS=Mus musculus GN=Nt5c3a	-51.0274	46	33.7	297	49	0.714286	4.17947	18
c342	c342.a1	c342.a1.a1	sp|P46460|NSF_MOUSE Vesicle-fusing ATPase OS=Mus musculus GN=Nsf PE=1 SV=2	-45.7339	19	82.5	744	49	0.285714	0.930698	18
c343	c343.a1	c343.a1.a1	sp|Q8VED9|LEGL_MOUSE Galectin-related protein OS=Mus musculus GN=Lgalsl PE=1 SV=1	-50.9649	54	18.9	172	49	1	9	18
c344	c344.a1	c344.a1.a1	sp|P56395|CYB5_MOUSE Cytochrome b5 OS=Mus musculus GN=Cyb5a PE=1 SV=2	-28.5229	47	15.2	134	48	1.2	14.8489	18
c345	c345.a1	c345.a1.a1	sp|O08795-2|GLU2B_MOUSE Isoform 2 of Glucosidase 2 subunit beta OS=Mus musculus GN=Prkcsh	-53.9828	26	59.4	528	48	0.6875	3.86968	17
c345	c345.a1	c345.a1.a2	sp|O08795|GLU2B_MOUSE Glucosidase 2 subunit beta OS=Mus musculus GN=Prkcsh PE=1 SV=1	-53.9828	27	58.7	521	48	0.733333	4.4117	17
c346	c346.a1	c346.a1.a1	sp|P50580|PA2G4_MOUSE Proliferation-associated protein 2G4 OS=Mus musculus GN=Pa2g4 PE=1 SV=3	-46.6426	32	43.6	394	48	0.545455	2.51119	18
c347	c347.a1	c347.a1.a1	sp|Q8VDN2|AT1A1_MOUSE Sodium/potassium-transporting ATPase subunit alpha-1 OS=Mus musculus GN=Atp1a1 PE=1 SV=1	-60.2015	16	112.8	1023	48	0.324324	1.1102	16
c348	c348.a1	c348.a1.a1	sp|P28740-2|KIF2A_MOUSE Isoform 2 of Kinesin-like protein KIF2A OS=Mus musculus GN=Kif2a	-46.2459	19	74.7	659	48	0.444444	1.78256	12
c349	c349.a1	c349.a1.a1	sp|Q99JR1|SFXN1_MOUSE Sideroflexin-1 OS=Mus musculus GN=Sfxn1 PE=1 SV=3	-47.3955	35	35.5	322	47	0.769231	4.87802	18
c349	c349.a2	c349.a2.a1	sp|Q91V61-2|SFXN3_MOUSE Isoform 2 of Sideroflexin-3 OS=Mus musculus GN=Sfxn3	-11.3389	14	31.6	288	7	0.25	0.778279	5
c349	c349.a2	c349.a2.a2	sp|Q91V61|SFXN3_MOUSE Sideroflexin-3 OS=Mus musculus GN=Sfxn3 PE=1 SV=1	-11.3389	12	35.3	321	7	0.266667	0.84785	5
c350	c350.a1	c350.a1.a1	sp|Q01339|APOH_MOUSE Beta-2-glycoprotein 1 OS=Mus musculus GN=Apoh PE=1 SV=1	-52.0863	39	38.5	345	48	0.714286	4.17947	14
c351	c351.a1	c351.a1.a1	sp|Q9Z2W0|DNPEP_MOUSE Aspartyl aminopeptidase OS=Mus musculus GN=Dnpep PE=1 SV=2	-48.9362	33	52.1	473	48	0.785714	5.1054	18
c352	c352.a1	c352.a1.a1	sp|Q9QUM4-2|SLAF1_MOUSE Isoform Short of Signaling lymphocytic activation molecule OS=Mus musculus GN=Slamf1	-34.1944	19	36.5	329	47	0.538462	2.45511	17
c352	c352.a1	c352.a1.a2	sp|Q9QUM4|SLAF1_MOUSE Signaling lymphocytic activation molecule OS=Mus musculus GN=Slamf1 PE=1 SV=1	-34.1944	18	38	343	47	0.636364	3.32876	17
c353	c353.a1	c353.a1.a1	sp|O09117-2|SYPL1_MOUSE Isoform 2 of Synaptophysin-like protein 1 OS=Mus musculus GN=Sypl1	-20.9043	21	26.7	243	47	1	9	18
c354	c354.a1	c354.a1.a1	sp|O70435|PSA3_MOUSE Proteasome subunit alpha type-3 OS=Mus musculus GN=Psma3 PE=1 SV=3	-39.2914	33	28.3	255	47	0.666667	3.64159	17
c355	c355.a1	c355.a1.a1	sp|Q61838|PZP_MOUSE Pregnancy zone protein OS=Mus musculus GN=Pzp PE=1 SV=3	-104.532	24	165.6	1495	47	0.442308	1.7689	7
c356	c356.a1	c356.a1.a1	sp|P42669|PURA_MOUSE Transcriptional activator protein Pur-alpha OS=Mus musculus GN=Pura PE=1 SV=1	-43.0611	37	34.8	321	47	0.857143	6.19686	17
c357	c357.a1	c357.a1.a1	sp|Q62219-4|TGFI1_MOUSE Isoform 4 of Transforming growth factor beta-1-induced transcript 1 protein OS=Mus musculus GN=Tgfb1i1	-36.0589	24	45.1	415	47	0.5	2.16228	17
c357	c357.a1	c357.a1.a2	sp|Q62219|TGFI1_MOUSE Transforming growth factor beta-1-induced transcript 1 protein OS=Mus musculus GN=Tgfb1i1 PE=1 SV=2	-36.0589	22	50	461	47	0.473684	1.97635	17
c358	c358.a1	c358.a1.a1	sp|O88947|FA10_MOUSE Coagulation factor X OS=Mus musculus GN=F10 PE=1 SV=1	-25.6163	7	53.9	481	46	0.2	0.584893	18
c359	c359.a1	c359.a1.a1	sp|P16330-2|CN37_MOUSE Isoform CNPI of 2',3'-cyclic-nucleotide 3'-phosphodiesterase OS=Mus musculus GN=Cnp	-47.4106	26	44.5	400	46	0.45	1.81838	17
c359	c359.a1	c359.a1.a2	sp|P16330|CN37_MOUSE 2',3'-cyclic-nucleotide 3'-phosphodiesterase OS=Mus musculus GN=Cnp PE=1 SV=3	-47.4106	25	47	420	46	0.409091	1.56502	17
c360	c360.a1	c360.a1.a1	sp|Q9Z0X1|AIFM1_MOUSE Apoptosis-inducing factor 1, mitochondrial OS=Mus musculus GN=Aifm1 PE=1 SV=1	-59.1292	28	66.6	612	46	0.448276	1.80722	16
c361	c361.a1	c361.a1.a1	sp|Q925F2|ESAM_MOUSE Endothelial cell-selective adhesion molecule OS=Mus musculus GN=Esam PE=1 SV=1	-29.809	22	41.7	394	46	0.315789	1.06914	18
c362	c362.a1	c362.a1.a1	sp|O08538|ANGP1_MOUSE Angiopoietin-1 OS=Mus musculus GN=Angpt1 PE=1 SV=2	-38.645	25	57.4	498	46	0.458333	1.87298	14
c363	c363.a1	c363.a1.a1	sp|P53994|RAB2A_MOUSE Ras-related protein Rab-2A OS=Mus musculus GN=Rab2a PE=1 SV=1	-49.8899	50	23.5	212	46	0.692308	3.92388	17
c364	c364.a1	c364.a1.a1	sp|P11438|LAMP1_MOUSE Lysosome-associated membrane glycoprotein 1 OS=Mus musculus GN=Lamp1 PE=1 SV=2	-22.596	12	43.7	406	45	0.416667	1.61016	15
c365	c365.a1	c365.a1.a1	sp|Q8VCF0|MAVS_MOUSE Mitochondrial antiviral-signaling protein OS=Mus musculus GN=Mavs PE=1 SV=1	-47.558	20	53.3	503	45	0.5	2.16228	17
c366	c366.a1	c366.a1.a1	sp|Q8K2B3|SDHA_MOUSE Succinate dehydrogenase [ubiquinone] flavoprotein subunit, mitochondrial OS=Mus musculus GN=Sdha PE=1 SV=1	-64.4635	28	72.4	664	45	0.52	2.31131	15
c367	c367.a1	c367.a1.a1	sp|Q9Z2X1-2|HNRPF_MOUSE Isoform 2 of Heterogeneous nuclear ribonucleoprotein F OS=Mus musculus GN=Hnrnpf	-34.6494	27	43.6	395	37	0.75	4.62341	16
c367	c367.a1	c367.a1.a2	sp|Q9Z2X1|HNRPF_MOUSE Heterogeneous nuclear ribonucleoprotein F OS=Mus musculus GN=Hnrnpf PE=1 SV=3	-34.6494	26	45.6	415	37	0.692308	3.92388	16
c367	c367.a2	c367.a2.a1	sp|O35737|HNRH1_MOUSE Heterogeneous nuclear ribonucleoprotein H OS=Mus musculus GN=Hnrnph1 PE=1 SV=3	-23.6287	17	49.1	449	28	0.428571	1.6827	16
c367	c367.a3	c367.a3.a1	sp|P70333|HNRH2_MOUSE Heterogeneous nuclear ribonucleoprotein H2 OS=Mus musculus GN=Hnrnph2 PE=1 SV=1	-19.0488	13	49.2	449	15	0.384615	1.42446	11
c368	c368.a1	c368.a1.a1	sp|O54834-3|RHG06_MOUSE Isoform 3 of Rho GTPase-activating protein 6 OS=Mus musculus GN=Arhgap6	-56.0459	17	89.6	805	44	0.297297	0.982884	13
c368	c368.a1	c368.a1.a2	sp|O54834-4|RHG06_MOUSE Isoform 4 of Rho GTPase-activating protein 6 OS=Mus musculus GN=Arhgap6	-56.0459	17	88.5	795	44	0.305556	1.02095	13
c368	c368.a1	c368.a1.a3	sp|O54834|RHG06_MOUSE Rho GTPase-activating protein 6 OS=Mus musculus GN=Arhgap6 PE=1 SV=3	-56.0459	13	108.7	987	44	0.244444	0.755676	13
c369	c369.a1	c369.a1.a1	sp|Q9ESB3|HRG_MOUSE Histidine-rich glycoprotein OS=Mus musculus GN=Hrg PE=1 SV=2	-45.7182	22	59	525	44	0.526316	2.35982	14
c370	c370.a1	c370.a1.a1	sp|P24063|ITAL_MOUSE Integrin alpha-L OS=Mus musculus GN=Itgal PE=1 SV=2	-57.9667	19	128.1	1163	44	0.294118	0.968419	13
c371	c371.a1	c371.a1.a1	sp|P62334|PRS10_MOUSE 26S protease regulatory subunit 10B OS=Mus musculus GN=Psmc6 PE=1 SV=1	-40.8458	30	44.1	389	44	0.444444	1.78256	16
c372	c372.a1	c372.a1.a1	sp|O88569-2|ROA2_MOUSE Isoform 2 of Heterogeneous nuclear ribonucleoproteins A2/B1 OS=Mus musculus GN=Hnrnpa2b1	-58.8873	40	35.9	341	34	0.8	5.30957	11
c372	c372.a1	c372.a1.a2	sp|O88569-3|ROA2_MOUSE Isoform 3 of Heterogeneous nuclear ribonucleoproteins A2/B1 OS=Mus musculus GN=Hnrnpa2b1	-58.8873	46	32.4	301	34	0.857143	6.19686	11
c372	c372.a1	c372.a1.a3	sp|O88569|ROA2_MOUSE Heterogeneous nuclear ribonucleoproteins A2/B1 OS=Mus musculus GN=Hnrnpa2b1 PE=1 SV=2	-58.8873	39	37.3	353	34	0.75	4.62341	11
c372	c372.a2	c372.a2.a1	sp|P49312|ROA1_MOUSE Heterogeneous nuclear ribonucleoprotein A1 OS=Mus musculus GN=Hnrnpa1 PE=1 SV=2	-23.6381	15	34.1	320	11	0.285714	0.930698	7
c373	c373.a1	c373.a1.a1	sp|Q60692|PSB6_MOUSE Proteasome subunit beta type-6 OS=Mus musculus GN=Psmb6 PE=1 SV=3	-22.603	19	25.3	238	43	0.5	2.16228	17
c374	c374.a1	c374.a1.a1	sp|O89103|C1QR1_MOUSE Complement component C1q receptor OS=Mus musculus GN=Cd93 PE=1 SV=1	-43.3843	19	69.2	644	43	0.421053	1.63665	18
c375	c375.a1	c375.a1.a1	sp|Q61735-2|CD47_MOUSE Isoform 2 of Leukocyte surface antigen CD47 OS=Mus musculus GN=Cd47	-32.7486	14	35.2	324	43	0.555556	2.59381	18
c376	c376.a1	c376.a1.a1	sp|Q01102|LYAM3_MOUSE P-selectin OS=Mus musculus GN=Selp PE=1 SV=1	-51.4002	20	82.9	768	43	0.785714	5.1054	13
c377	c377.a1	c377.a1.a1	sp|Q9R1P0|PSA4_MOUSE Proteasome subunit alpha type-4 OS=Mus musculus GN=Psma4 PE=1 SV=1	-31.0869	30	29.4	261	43	0.888889	6.74264	18
c378	c378.a1	c378.a1.a1	sp|O55106|STRN_MOUSE Striatin OS=Mus musculus GN=Strn PE=1 SV=2	-57.4178	18	85.8	780	43	0.257143	0.807769	17
c379	c379.a1	c379.a1.a1	sp|Q7TSV4|PGM2_MOUSE Phosphoglucomutase-2 OS=Mus musculus GN=Pgm2 PE=1 SV=1	-54.4712	27	68.6	620	43	0.37931	1.39503	17
c380	c380.a1	c380.a1.a1	sp|P68040|RACK1_MOUSE Receptor of activated protein C kinase 1 OS=Mus musculus GN=Rack1 PE=1 SV=3	-36.9839	39	35	317	43	0.6	2.98107	16
c381	c381.a1	c381.a1.a1	sp|Q9DCD0|6PGD_MOUSE 6-phosphogluconate dehydrogenase, decarboxylating OS=Mus musculus GN=Pgd PE=1 SV=3	-44.9923	24	53.1	483	43	0.45	1.81838	15
c382	c382.a1	c382.a1.a1	sp|P20108|PRDX3_MOUSE Thioredoxin-dependent peroxide reductase, mitochondrial OS=Mus musculus GN=Prdx3 PE=1 SV=1	-41.6863	30	28	257	43	0.545455	2.51119	18
c383	c383.a1	c383.a1.a1	sp|Q80TY0-2|FNBP1_MOUSE Isoform 2 of Formin-binding protein 1 OS=Mus musculus GN=Fnbp1	-56.1341	26	64	550	42	0.5	2.16228	15
c383	c383.a1	c383.a1.a2	sp|Q80TY0-3|FNBP1_MOUSE Isoform 3 of Formin-binding protein 1 OS=Mus musculus GN=Fnbp1	-56.1341	26	64.1	551	42	0.5	2.16228	15
c383	c383.a1	c383.a1.a3	sp|Q80TY0|FNBP1_MOUSE Formin-binding protein 1 OS=Mus musculus GN=Fnbp1 PE=1 SV=2	-56.1341	23	71.2	616	42	0.48	2.01995	15
c384	c384.a1	c384.a1.a1	sp|P19157|GSTP1_MOUSE Glutathione S-transferase P 1 OS=Mus musculus GN=Gstp1 PE=1 SV=2	-33.9201	26	23.5	210	42	0.555556	2.59381	18
c385	c385.a1	c385.a1.a1	sp|P49722|PSA2_MOUSE Proteasome subunit alpha type-2 OS=Mus musculus GN=Psma2 PE=1 SV=3	-41.9281	36	25.8	234	42	1	9	14
c386	c386.a1	c386.a1.a1	sp|Q93092|TALDO_MOUSE Transaldolase OS=Mus musculus GN=Taldo1 PE=1 SV=2	-39.2421	24	37.3	337	41	0.5	2.16228	18
c387	c387.a1	c387.a1.a1	sp|O35295|PURB_MOUSE Transcriptional activator protein Pur-beta OS=Mus musculus GN=Purb PE=1 SV=3	-47.9681	59	33.8	324	41	1.125	12.3352	18
c388	c388.a1	c388.a1.a1	sp|Q3UZ39|LRRF1_MOUSE Leucine-rich repeat flightless-interacting protein 1 OS=Mus musculus GN=Lrrfip1 PE=1 SV=2	-63.0108	33	79.1	729	41	0.521739	2.3246	11
c389	c389.a1	c389.a1.a1	sp|O55033|NCK2_MOUSE Cytoplasmic protein NCK2 OS=Mus musculus GN=Nck2 PE=1 SV=1	-45.3792	31	42.8	380	41	0.421053	1.63665	17
c390	c390.a1	c390.a1.a1	sp|P18572-2|BASI_MOUSE Isoform 2 of Basigin OS=Mus musculus GN=Bsg	-27.0521	19	29.6	273	41	0.363636	1.31013	16
c391	c391.a1	c391.a1.a1	sp|Q9Z2U0|PSA7_MOUSE Proteasome subunit alpha type-7 OS=Mus musculus GN=Psma7 PE=1 SV=1	-43.0505	40	27.8	248	41	0.615385	3.12463	16
c392	c392.a1	c392.a1.a1	sp|Q9CQW2|ARL8B_MOUSE ADP-ribosylation factor-like protein 8B OS=Mus musculus GN=Arl8b PE=1 SV=1	-24.1697	25	21.4	186	25	0.7	4.01187	11
c392	c392.a2	c392.a2.a1	sp|Q8VEH3|ARL8A_MOUSE ADP-ribosylation factor-like protein 8A OS=Mus musculus GN=Arl8a PE=1 SV=1	-24.3498	29	21.3	186	19	0.363636	1.31013	15
c393	c393.a1	c393.a1.a1	sp|Q99MS7-2|EH1L1_MOUSE Isoform 2 of EH domain-binding protein 1-like protein 1 OS=Mus musculus GN=Ehbp1l1	-60.7242	18	95.7	877	40	0.323529	1.10634	12
c393	c393.a2	c393.a2.a1	sp|Q99MS7|EH1L1_MOUSE EH domain-binding protein 1-like protein 1 OS=Mus musculus GN=Ehbp1l1 PE=1 SV=1	-56.2013	9	184.6	1716	38	0.141026	0.383648	12
c394	c394.a1	c394.a1.a1	sp|Q9DBG6|RPN2_MOUSE Dolichyl-diphosphooligosaccharide--protein glycosyltransferase subunit 2 OS=Mus musculus GN=Rpn2 PE=1 SV=1	-53.8881	21	68.9	631	41	0.529412	2.38386	14
c395	c395.a1	c395.a1.a1	sp|Q61335|BAP31_MOUSE B-cell receptor-associated protein 31 OS=Mus musculus GN=Bcap31 PE=1 SV=4	-39.1786	35	27.9	245	40	1.33333	20.5443	16
c396	c396.a1	c396.a1.a1	sp|Q8CDN6|TXNL1_MOUSE Thioredoxin-like protein 1 OS=Mus musculus GN=Txnl1 PE=1 SV=3	-45.4825	43	32.1	289	40	0.666667	3.64159	16
c397	c397.a1	c397.a1.a1	sp|P10107|ANXA1_MOUSE Annexin A1 OS=Mus musculus GN=Anxa1 PE=1 SV=2	-53.2998	35	38.6	346	40	0.526316	2.35982	15
c398	c398.a1	c398.a1.a1	sp|Q64010|CRK_MOUSE Adapter molecule crk OS=Mus musculus GN=Crk PE=1 SV=1	-46.5357	36	33.7	304	40	0.388889	1.44844	15
c399	c399.a1	c399.a1.a1	sp|Q8BMS1|ECHA_MOUSE Trifunctional enzyme subunit alpha, mitochondrial OS=Mus musculus GN=Hadha PE=1 SV=1	-60.1776	22	82.5	763	40	0.387097	1.43835	15
c400	c400.a1	c400.a1.a1	sp|Q61792|LASP1_MOUSE LIM and SH3 domain protein 1 OS=Mus musculus GN=Lasp1 PE=1 SV=1	-33.2411	35	29.9	263	39	0.75	4.62341	16
c401	c401.a1	c401.a1.a1	sp|Q9CPV4-2|GLOD4_MOUSE Isoform 2 of Glyoxalase domain-containing protein 4 OS=Mus musculus GN=Glod4	-35.1288	37	32.3	291	39	0.421053	1.63665	16
c401	c401.a1	c401.a1.a2	sp|Q9CPV4-3|GLOD4_MOUSE Isoform 3 of Glyoxalase domain-containing protein 4 OS=Mus musculus GN=Glod4	-35.1288	39	30.7	279	39	0.444444	1.78256	16
c401	c401.a1	c401.a1.a3	sp|Q9CPV4|GLOD4_MOUSE Glyoxalase domain-containing protein 4 OS=Mus musculus GN=Glod4 PE=1 SV=1	-35.1288	36	33.2	298	39	0.4	1.51189	16
c402	c402.a1	c402.a1.a1	sp|Q8VDM4|PSMD2_MOUSE 26S proteasome non-ATPase regulatory subunit 2 OS=Mus musculus GN=Psmd2 PE=1 SV=1	-28.3473	9	100	908	39	0.159091	0.442417	14
c403	c403.a1	c403.a1.a1	sp|Q99L88|SNTB1_MOUSE Beta-1-syntrophin OS=Mus musculus GN=Sntb1 PE=1 SV=4	-37.4043	26	57.9	537	39	0.346154	1.21898	17
c404	c404.a1	c404.a1.a1	sp|P42125|ECI1_MOUSE Enoyl-CoA delta isomerase 1, mitochondrial OS=Mus musculus GN=Eci1 PE=1 SV=2	-34.8199	27	32.1	289	39	0.538462	2.45511	15
c405	c405.a1	c405.a1.a1	sp|O54734|OST48_MOUSE Dolichyl-diphosphooligosaccharide--protein glycosyltransferase 48 kDa subunit OS=Mus musculus GN=Ddost PE=1 SV=2	-39.0969	16	48.9	441	39	0.4375	1.73842	14
c406	c406.a1	c406.a1.a1	sp|O70404|VAMP8_MOUSE Vesicle-associated membrane protein 8 OS=Mus musculus GN=Vamp8 PE=1 SV=1	-20.2284	40	11.4	101	38	1	9	15
c407	c407.a1	c407.a1.a1	sp|O55022|PGRC1_MOUSE Membrane-associated progesterone receptor component 1 OS=Mus musculus GN=Pgrmc1 PE=1 SV=4	-22.4286	22	21.6	195	23	0.571429	2.72759	15
c407	c407.a2	c407.a2.a1	sp|Q80UU9|PGRC2_MOUSE Membrane-associated progesterone receptor component 2 OS=Mus musculus GN=Pgrmc2 PE=1 SV=2	-31.7274	30	23.2	217	16	0.4	1.51189	14
c408	c408.a1	c408.a1.a1	sp|P15379-10|CD44_MOUSE Isoform 8 of CD44 antigen OS=Mus musculus GN=Cd44	-34.6913	7	67.4	616	38	0.4	1.51189	18
c408	c408.a1	c408.a1.a2	sp|P15379-11|CD44_MOUSE Isoform 9 of CD44 antigen OS=Mus musculus GN=Cd44	-34.6913	8	62.7	575	38	0.444444	1.78256	18
c408	c408.a1	c408.a1.a3	sp|P15379-2|CD44_MOUSE Isoform 13 of CD44 antigen OS=Mus musculus GN=Cd44	-34.6913	12	39.9	363	38	0.5	2.16228	18
c408	c408.a1	c408.a1.a4	sp|P15379-3|CD44_MOUSE Isoform 12 of CD44 antigen OS=Mus musculus GN=Cd44	-34.6913	10	50.3	461	38	0.5	2.16228	18
c408	c408.a1	c408.a1.a5	sp|P15379-4|CD44_MOUSE Isoform 4 of CD44 antigen OS=Mus musculus GN=Cd44	-34.6913	7	71.6	654	38	0.363636	1.31013	18
c408	c408.a1	c408.a1.a6	sp|P15379-5|CD44_MOUSE Isoform 6 of CD44 antigen OS=Mus musculus GN=Cd44	-34.6913	8	62.7	576	38	0.5	2.16228	18
c408	c408.a1	c408.a1.a7	sp|P15379-6|CD44_MOUSE Isoform 7 of CD44 antigen OS=Mus musculus GN=Cd44	-34.6913	9	53.9	496	38	0.5	2.16228	18
c408	c408.a1	c408.a1.a8	sp|P15379-7|CD44_MOUSE Isoform 2 of CD44 antigen OS=Mus musculus GN=Cd44	-34.6913	6	80.9	736	38	0.307692	1.03092	18
c408	c408.a1	c408.a1.a9	sp|P15379-8|CD44_MOUSE Isoform 3 of CD44 antigen OS=Mus musculus GN=Cd44	-34.6913	6	76.3	697	38	0.4	1.51189	18
c408	c408.a1	c408.a1.b10	sp|P15379-9|CD44_MOUSE Isoform 5 of CD44 antigen OS=Mus musculus GN=Cd44	-34.6913	7	67.4	617	38	0.444444	1.78256	18
c408	c408.a1	c408.a1.b11	sp|P15379|CD44_MOUSE CD44 antigen OS=Mus musculus GN=Cd44 PE=1 SV=3	-34.6913	6	85.5	778	38	0.307692	1.03092	18
c409	c409.a1	c409.a1.a1	sp|O35129|PHB2_MOUSE Prohibitin-2 OS=Mus musculus GN=Phb2 PE=1 SV=1	-47.5975	37	33.2	299	38	0.555556	2.59381	14
c410	c410.a1	c410.a1.a1	sp|Q9CY64|BIEA_MOUSE Biliverdin reductase A OS=Mus musculus GN=Blvra PE=1 SV=1	-33.5182	31	33.4	295	38	0.4375	1.73842	16
c411	c411.a1	c411.a1.a1	sp|Q62186|SSRD_MOUSE Translocon-associated protein subunit delta OS=Mus musculus GN=Ssr4 PE=1 SV=1	-24.523	30	18.8	172	38	1	9	18
c412	c412.a1	c412.a1.a1	sp|P52825|CPT2_MOUSE Carnitine O-palmitoyltransferase 2, mitochondrial OS=Mus musculus GN=Cpt2 PE=1 SV=2	-42.7072	20	73.8	658	38	0.392857	1.47091	18
c413	c413.a1	c413.a1.a1	sp|Q9D6R2|IDH3A_MOUSE Isocitrate dehydrogenase [NAD] subunit alpha, mitochondrial OS=Mus musculus GN=Idh3a PE=1 SV=1	-44.4414	31	39.5	366	38	0.555556	2.59381	14
c414	c414.a1	c414.a1.a1	sp|P30412|PPIC_MOUSE Peptidyl-prolyl cis-trans isomerase C OS=Mus musculus GN=Ppic PE=1 SV=1	-31.5934	26	22.7	212	38	0.5	2.16228	18
c415	c415.a1	c415.a1.a1	sp|Q8R143|PTTG_MOUSE Pituitary tumor-transforming gene 1 protein-interacting protein OS=Mus musculus GN=Pttg1ip PE=1 SV=1	-16.1552	16	19.9	174	37	0.833333	5.81292	18
c416	c416.a1	c416.a1.a1	sp|O08788-2|DCTN1_MOUSE Isoform 2 of Dynactin subunit 1 OS=Mus musculus GN=Dctn1	-49.4816	11	138	1243	37	0.188679	0.544114	13
c416	c416.a1	c416.a1.a2	sp|O08788|DCTN1_MOUSE Dynactin subunit 1 OS=Mus musculus GN=Dctn1 PE=1 SV=3	-49.4816	10	141.4	1281	37	0.181818	0.519911	13
c417	c417.a1	c417.a1.a1	sp|Q9ERN0|SCAM2_MOUSE Secretory carrier-associated membrane protein 2 OS=Mus musculus GN=Scamp2 PE=1 SV=1	-30.3591	17	36.4	329	37	1	9	18
c418	c418.a1	c418.a1.a1	sp|Q8CI51|PDLI5_MOUSE PDZ and LIM domain protein 5 OS=Mus musculus GN=Pdlim5 PE=1 SV=4	-33.1685	20	63.2	591	37	0.26087	0.823348	18
c419	c419.a1	c419.a1.a1	sp|Q9DB05|SNAA_MOUSE Alpha-soluble NSF attachment protein OS=Mus musculus GN=Napa PE=1 SV=1	-50.2768	40	33.1	295	37	0.555556	2.59381	18
c420	c420.a1	c420.a1.a1	sp|P58389|PTPA_MOUSE Serine/threonine-protein phosphatase 2A activator OS=Mus musculus GN=Ppp2r4 PE=1 SV=1	-33.1347	33	36.6	323	37	0.666667	3.64159	16
c421	c421.a1	c421.a1.a1	sp|P22437|PGH1_MOUSE Prostaglandin G/H synthase 1 OS=Mus musculus GN=Ptgs1 PE=1 SV=1	-48.8989	17	68.9	602	37	0.578947	2.79269	13
c422	c422.a1	c422.a1.a1	sp|Q61081|CDC37_MOUSE Hsp90 co-chaperone Cdc37 OS=Mus musculus GN=Cdc37 PE=1 SV=1	-39.625	20	44.5	379	37	0.636364	3.32876	18
c423	c423.a1	c423.a1.a1	sp|P18242|CATD_MOUSE Cathepsin D OS=Mus musculus GN=Ctsd PE=1 SV=1	-36.3639	19	44.8	410	37	0.375	1.37137	15
c424	c424.a1	c424.a1.a1	sp|Q99KJ8|DCTN2_MOUSE Dynactin subunit 2 OS=Mus musculus GN=Dctn2 PE=1 SV=3	-60.0066	36	44	402	37	0.666667	3.64159	18
c425	c425.a1	c425.a1.a1	sp|P32921-2|SYWC_MOUSE Isoform 2 of Tryptophan--tRNA ligase, cytoplasmic OS=Mus musculus GN=Wars	-39.7002	31	53.5	475	37	0.44	1.75423	18
c425	c425.a1	c425.a1.a2	sp|P32921|SYWC_MOUSE Tryptophan--tRNA ligase, cytoplasmic OS=Mus musculus GN=Wars PE=1 SV=2	-39.7002	31	54.2	481	37	0.44	1.75423	18
c426	c426.a1	c426.a1.a1	sp|Q8BIW1|PRUNE_MOUSE Protein prune homolog OS=Mus musculus GN=Prune PE=1 SV=1	-37.3094	29	50.1	454	37	0.526316	2.35982	17
c427	c427.a1	c427.a1.a1	sp|P70441|NHRF1_MOUSE Na(+)/H(+) exchange regulatory cofactor NHE-RF1 OS=Mus musculus GN=Slc9a3r1 PE=1 SV=3	-35.2845	24	38.5	355	36	0.4375	1.73842	16
c428	c428.a1	c428.a1.a1	sp|P70452|STX4_MOUSE Syntaxin-4 OS=Mus musculus GN=Stx4 PE=1 SV=1	-27.6475	31	34.1	298	36	0.583333	2.83119	16
c429	c429.a1	c429.a1.a1	sp|P50247|SAHH_MOUSE Adenosylhomocysteinase OS=Mus musculus GN=Ahcy PE=1 SV=3	-37.6868	25	47.6	432	36	0.380952	1.4041	16
c430	c430.a1	c430.a1.a1	sp|P24527|LKHA4_MOUSE Leukotriene A-4 hydrolase OS=Mus musculus GN=Lta4h PE=1 SV=4	-56.3188	25	68.9	611	36	0.419355	1.62636	15
c431	c431.a1	c431.a1.a1	sp|P26638|SYSC_MOUSE Serine--tRNA ligase, cytoplasmic OS=Mus musculus GN=Sars PE=1 SV=3	-30.0557	20	58.3	512	36	0.333333	1.15443	17
c432	c432.a1	c432.a1.a1	sp|P41241|CSK_MOUSE Tyrosine-protein kinase CSK OS=Mus musculus GN=Csk PE=1 SV=2	-45.5965	30	50.6	450	36	0.37037	1.34623	17
c433	c433.a1	c433.a1.a1	sp|O08677-2|KNG1_MOUSE Isoform LMW of Kininogen-1 OS=Mus musculus GN=Kng1	-52.756	34	47.8	432	36	0.619048	3.15956	11
c433	c433.a1	c433.a1.a2	sp|O08677-3|KNG1_MOUSE Isoform 3 of Kininogen-1 OS=Mus musculus GN=Kng1	-52.756	31	53.1	480	36	0.65	3.46684	11
c433	c433.a1	c433.a1.a3	sp|O08677|KNG1_MOUSE Kininogen-1 OS=Mus musculus GN=Kng1 PE=1 SV=1	-52.756	22	73	661	36	0.481481	2.03027	11
c434	c434.a1	c434.a1.a1	sp|P24452|CAPG_MOUSE Macrophage-capping protein OS=Mus musculus GN=Capg PE=1 SV=2	-25.4549	18	39.1	352	36	0.666667	3.64159	18
c435	c435.a1	c435.a1.a1	sp|Q8R146-2|APEH_MOUSE Isoform 2 of Acylamino-acid-releasing enzyme OS=Mus musculus GN=Apeh	-57.2749	24	79.8	717	36	0.545455	2.51119	16
c435	c435.a1	c435.a1.a2	sp|Q8R146|APEH_MOUSE Acylamino-acid-releasing enzyme OS=Mus musculus GN=Apeh PE=1 SV=3	-57.2749	24	81.4	732	36	0.571429	2.72759	16
c436	c436.a1	c436.a1.a1	sp|O88487|DC1I2_MOUSE Cytoplasmic dynein 1 intermediate chain 2 OS=Mus musculus GN=Dync1i2 PE=1 SV=1	-39.5508	18	68.3	612	35	0.388889	1.44844	15
c437	c437.a1	c437.a1.a1	sp|O70439|STX7_MOUSE Syntaxin-7 OS=Mus musculus GN=Stx7 PE=1 SV=3	-37.9596	23	29.7	261	35	0.6	2.98107	18
c438	c438.a1	c438.a1.a1	sp|Q9Z2I9|SUCB1_MOUSE Succinate--CoA ligase [ADP-forming] subunit beta, mitochondrial OS=Mus musculus GN=Sucla2 PE=1 SV=2	-38.2636	26	50	463	35	0.47619	1.99358	14
c439	c439.a1	c439.a1.a1	sp|Q99L47|F10A1_MOUSE Hsc70-interacting protein OS=Mus musculus GN=St13 PE=1 SV=1	-23.9863	15	41.5	371	35	0.75	4.62341	16
c440	c440.a1	c440.a1.a1	sp|P35486|ODPA_MOUSE Pyruvate dehydrogenase E1 component subunit alpha, somatic form, mitochondrial OS=Mus musculus GN=Pdha1 PE=1 SV=1	-26.2819	23	43.1	390	35	0.294118	0.968419	18
c441	c441.a1	c441.a1.a1	sp|Q61425|HCDH_MOUSE Hydroxyacyl-coenzyme A dehydrogenase, mitochondrial OS=Mus musculus GN=Hadh PE=1 SV=2	-41.8114	33	34.4	314	35	0.875	6.49894	16
c442	c442.a1	c442.a1.a1	sp|P62715|PP2AB_MOUSE Serine/threonine-protein phosphatase 2A catalytic subunit beta isoform OS=Mus musculus GN=Ppp2cb PE=1 SV=1	-33.5786	30	35.5	309	34	0.714286	4.17947	15
c442	c442.a2	c442.a2.a1	sp|P63330|PP2AA_MOUSE Serine/threonine-protein phosphatase 2A catalytic subunit alpha isoform OS=Mus musculus GN=Ppp2ca PE=1 SV=1	-31.445	30	35.5	309	32	0.714286	4.17947	15
c443	c443.a1	c443.a1.a1	sp|P11352|GPX1_MOUSE Glutathione peroxidase 1 OS=Mus musculus GN=Gpx1 PE=1 SV=2	-48.0359	41	22.1	201	35	0.692308	3.92388	12
c444	c444.a1	c444.a1.a1	sp|Q4FJU9|TMM40_MOUSE Transmembrane protein 40 OS=Mus musculus GN=Tmem40 PE=1 SV=1	-36.5746	36	24.8	225	34	1.16667	13.678	18
c445	c445.a1	c445.a1.a1	sp|Q9R1P4|PSA1_MOUSE Proteasome subunit alpha type-1 OS=Mus musculus GN=Psma1 PE=1 SV=1	-45.6576	45	29.4	263	34	0.785714	5.1054	13
c446	c446.a1	c446.a1.a1	sp|Q91VW3|SH3L3_MOUSE SH3 domain-binding glutamic acid-rich-like protein 3 OS=Mus musculus GN=Sh3bgrl3 PE=1 SV=1	-19.8794	30	10.4	93	34	1	9	17
c447	c447.a1	c447.a1.a1	sp|P97372|PSME2_MOUSE Proteasome activator complex subunit 2 OS=Mus musculus GN=Psme2 PE=1 SV=4	-36.2645	42	27	239	34	0.769231	4.87802	13
c448	c448.a1	c448.a1.a1	sp|Q9QYB5-2|ADDG_MOUSE Isoform 1 of Gamma-adducin OS=Mus musculus GN=Add3	-38.7596	20	75.3	674	34	0.458333	1.87298	15
c448	c448.a1	c448.a1.a2	sp|Q9QYB5|ADDG_MOUSE Gamma-adducin OS=Mus musculus GN=Add3 PE=1 SV=2	-38.7596	19	78.6	706	34	0.458333	1.87298	15
c449	c449.a1	c449.a1.a1	sp|Q921U8-2|SMTN_MOUSE Isoform L2 of Smoothelin OS=Mus musculus GN=Smtn	-61.7282	19	100	921	34	0.351351	1.2457	12
c450	c450.a1	c450.a1.a1	sp|Q9D0M3-2|CY1_MOUSE Isoform 2 of Cytochrome c1, heme protein, mitochondrial OS=Mus musculus GN=Cyc1	-42.5974	58	29.4	266	34	1	9	13
c450	c450.a1	c450.a1.a2	sp|Q9D0M3|CY1_MOUSE Cytochrome c1, heme protein, mitochondrial OS=Mus musculus GN=Cyc1 PE=1 SV=1	-42.5974	47	35.2	325	34	0.769231	4.87802	13
c451	c451.a1	c451.a1.a1	sp|Q99JB2|STML2_MOUSE Stomatin-like protein 2, mitochondrial OS=Mus musculus GN=Stoml2 PE=1 SV=1	-44.7798	30	38.3	353	34	0.583333	2.83119	12
c452	c452.a1	c452.a1.a1	sp|Q9DCX2|ATP5H_MOUSE ATP synthase subunit d, mitochondrial OS=Mus musculus GN=Atp5h PE=1 SV=3	-48.1671	53	18.7	161	34	1.25	16.7828	15
c453	c453.a1	c453.a1.a1	sp|Q9CQ92|FIS1_MOUSE Mitochondrial fission 1 protein OS=Mus musculus GN=Fis1 PE=1 SV=1	-47.2309	49	16.9	152	34	1.33333	20.5443	16
c454	c454.a1	c454.a1.a1	sp|Q8BVI4|DHPR_MOUSE Dihydropteridine reductase OS=Mus musculus GN=Qdpr PE=1 SV=2	-36.4019	35	25.5	241	34	0.545455	2.51119	14
c455	c455.a1	c455.a1.a1	sp|Q9CPW4|ARPC5_MOUSE Actin-related protein 2/3 complex subunit 5 OS=Mus musculus GN=Arpc5 PE=1 SV=3	-78.5325	51	16.2	151	34	1.33333	20.5443	17
c456	c456.a1	c456.a1.a1	sp|Q9CXW3|CYBP_MOUSE Calcyclin-binding protein OS=Mus musculus GN=Cacybp PE=1 SV=1	-28.6665	18	26.4	229	34	0.545455	2.51119	16
c457	c457.a1	c457.a1.a1	sp|P13609|SRGN_MOUSE Serglycin OS=Mus musculus GN=Srgn PE=1 SV=1	-27.1215	37	16.6	152	34	1.25	16.7828	17
c458	c458.a1	c458.a1.a1	sp|Q8BPB0|MOB1B_MOUSE MOB kinase activator 1B OS=Mus musculus GN=Mob1b PE=1 SV=3	-10.4023	10	25	216	33	0.333333	1.15443	18
c458	c458.a1	c458.a1.a2	sp|Q921Y0-2|MOB1A_MOUSE Isoform 2 of MOB kinase activator 1A OS=Mus musculus GN=Mob1a	-10.4023	16	16.2	140	33	0.4	1.51189	18
c458	c458.a1	c458.a1.a3	sp|Q921Y0|MOB1A_MOUSE MOB kinase activator 1A OS=Mus musculus GN=Mob1a PE=2 SV=3	-10.4023	10	25	216	33	0.333333	1.15443	18
c459	c459.a1	c459.a1.a1	sp|P70677|CASP3_MOUSE Caspase-3 OS=Mus musculus GN=Casp3 PE=1 SV=1	-20.4059	14	31.4	277	27	0.214286	0.637894	15
c459	c459.a2	c459.a2.a1	sp|O08738|CASP6_MOUSE Caspase-6 OS=Mus musculus GN=Casp6 PE=1 SV=1	-8.51428	6	31.5	276	10	0.181818	0.519911	9
c460	c460.a1	c460.a1.a1	sp|P63085|MK01_MOUSE Mitogen-activated protein kinase 1 OS=Mus musculus GN=Mapk1 PE=1 SV=3	-32.5548	32	41.2	358	33	0.555556	2.59381	17
c461	c461.a1	c461.a1.a1	sp|Q9ES97-2|RTN3_MOUSE Isoform 2 of Reticulon-3 OS=Mus musculus GN=Rtn3	-31.1988	8	101.7	945	32	0.166667	0.467799	14
c461	c461.a1	c461.a1.a2	sp|Q9ES97-5|RTN3_MOUSE Isoform 5 of Reticulon-3 OS=Mus musculus GN=Rtn3	-31.1988	12	68.6	643	32	0.3	0.995262	14
c461	c461.a1	c461.a1.a3	sp|Q9ES97|RTN3_MOUSE Reticulon-3 OS=Mus musculus GN=Rtn3 PE=1 SV=2	-31.1988	8	103.7	964	32	0.171429	0.483982	14
c461	c461.a2	c461.a2.a1	sp|Q8K0T0|RTN1_MOUSE Reticulon-1 OS=Mus musculus GN=Rtn1 PE=1 SV=1	-5.12563	2	83.4	780	3	0.0909091	0.232847	2
c462	c462.a1	c462.a1.a1	sp|Q9QWR8|NAGAB_MOUSE Alpha-N-acetylgalactosaminidase OS=Mus musculus GN=Naga PE=1 SV=2	-26.2629	18	47.1	415	33	0.26087	0.823348	17
c463	c463.a1	c463.a1.a1	sp|Q9Z2U1|PSA5_MOUSE Proteasome subunit alpha type-5 OS=Mus musculus GN=Psma5 PE=1 SV=1	-38.0186	43	26.3	241	33	0.8	5.30957	16
c464	c464.a1	c464.a1.a1	sp|Q9JII6|AK1A1_MOUSE Alcohol dehydrogenase [NADP(+)] OS=Mus musculus GN=Akr1a1 PE=1 SV=3	-31.1031	20	36.5	325	33	0.375	1.37137	17
c465	c465.a1	c465.a1.a1	sp|Q8BMD8|SCMC1_MOUSE Calcium-binding mitochondrial carrier protein SCaMC-1 OS=Mus musculus GN=Slc25a24 PE=1 SV=1	-61.5116	30	52.8	475	33	0.565217	2.67466	16
c466	c466.a1	c466.a1.a1	sp|O89079|COPE_MOUSE Coatomer subunit epsilon OS=Mus musculus GN=Cope PE=1 SV=3	-40.9314	29	34.5	308	33	0.5	2.16228	17
c467	c467.a1	c467.a1.a1	sp|P70290|EM55_MOUSE 55 kDa erythrocyte membrane protein OS=Mus musculus GN=Mpp1 PE=1 SV=1	-39.017	27	52.1	466	33	0.47619	1.99358	17
c468	c468.a1	c468.a1.a1	sp|Q9D880|TIM50_MOUSE Mitochondrial import inner membrane translocase subunit TIM50 OS=Mus musculus GN=Timm50 PE=1 SV=1	-29.1112	23	39.7	353	33	0.428571	1.6827	17
c469	c469.a1	c469.a1.a1	sp|Q9QZ06|TOLIP_MOUSE Toll-interacting protein OS=Mus musculus GN=Tollip PE=1 SV=1	-31.6674	40	30.2	274	33	0.727273	4.3367	14
c470	c470.a1	c470.a1.a1	sp|P62331|ARF6_MOUSE ADP-ribosylation factor 6 OS=Mus musculus GN=Arf6 PE=1 SV=2	-20.0162	30	20	175	33	0.857143	6.19686	18
c471	c471.a1	c471.a1.a1	sp|Q9R1P1|PSB3_MOUSE Proteasome subunit beta type-3 OS=Mus musculus GN=Psmb3 PE=1 SV=1	-35.7181	35	22.9	205	33	1	9	17
c472	c472.a1	c472.a1.a1	sp|Q4KML4|ABRAL_MOUSE Costars family protein ABRACL OS=Mus musculus GN=Abracl PE=1 SV=1	-27.8591	46	9	81	33	1.66667	45.4159	17
c473	c473.a1	c473.a1.a1	sp|Q80UG5-2|SEPT9_MOUSE Isoform 2 of Septin-9 OS=Mus musculus GN=Sept9	-34.2308	27	38.5	334	32	0.368421	1.33572	17
c473	c473.a1	c473.a1.a2	sp|Q80UG5-3|SEPT9_MOUSE Isoform 3 of Septin-9 OS=Mus musculus GN=Sept9	-34.2308	16	64.6	576	32	0.233333	0.711328	17
c473	c473.a1	c473.a1.a3	sp|Q80UG5|SEPT9_MOUSE Septin-9 OS=Mus musculus GN=Sept9 PE=1 SV=1	-34.2308	15	65.4	583	32	0.233333	0.711328	17
c474	c474.a1	c474.a1.a1	sp|Q99JP6-2|HOME3_MOUSE Isoform 2 of Homer protein homolog 3 OS=Mus musculus GN=Homer3	-37.1686	28	40	359	32	0.388889	1.44844	11
c474	c474.a1	c474.a1.a2	sp|Q99JP6|HOME3_MOUSE Homer protein homolog 3 OS=Mus musculus GN=Homer3 PE=1 SV=2	-37.1686	28	39.6	356	32	0.411765	1.58086	11
c475	c475.a1	c475.a1.a1	sp|P63024|VAMP3_MOUSE Vesicle-associated membrane protein 3 OS=Mus musculus GN=Vamp3 PE=1 SV=1	-37.7785	53	11.4	103	32	1	9	17
c476	c476.a1	c476.a1.a1	sp|Q91V12-2|BACH_MOUSE Isoform A of Cytosolic acyl coenzyme A thioester hydrolase OS=Mus musculus GN=Acot7	-23.5593	15	37.4	338	32	0.25	0.778279	17
c476	c476.a1	c476.a1.a2	sp|Q91V12-3|BACH_MOUSE Isoform C of Cytosolic acyl coenzyme A thioester hydrolase OS=Mus musculus GN=Acot7	-23.5593	15	39.1	350	32	0.25	0.778279	17
c476	c476.a1	c476.a1.a3	sp|Q91V12-4|BACH_MOUSE Isoform D of Cytosolic acyl coenzyme A thioester hydrolase OS=Mus musculus GN=Acot7	-23.5593	14	41.5	379	32	0.235294	0.719072	17
c476	c476.a1	c476.a1.a4	sp|Q91V12|BACH_MOUSE Cytosolic acyl coenzyme A thioester hydrolase OS=Mus musculus GN=Acot7 PE=1 SV=2	-23.5593	14	42.4	381	32	0.222222	0.668101	17
c477	c477.a1	c477.a1.a1	sp|Q9CRB9|MIC19_MOUSE MICOS complex subunit Mic19 OS=Mus musculus GN=Chchd3 PE=1 SV=1	-23.5495	32	26.2	227	31	0.666667	3.64159	17
c478	c478.a1	c478.a1.a1	sp|Q9WVE8|PACN2_MOUSE Protein kinase C and casein kinase substrate in neurons protein 2 OS=Mus musculus GN=Pacsin2 PE=1 SV=1	-28.7633	17	55.7	486	31	0.411765	1.58086	18
c479	c479.a1	c479.a1.a1	sp|Q8R016|BLMH_MOUSE Bleomycin hydrolase OS=Mus musculus GN=Blmh PE=1 SV=1	-36.9773	26	52.4	455	31	0.45	1.81838	15
c480	c480.a1	c480.a1.a1	sp|P46471|PRS7_MOUSE 26S protease regulatory subunit 7 OS=Mus musculus GN=Psmc2 PE=1 SV=5	-55.0438	26	48.5	433	31	0.346154	1.21898	14
c481	c481.a1	c481.a1.a1	sp|Q9Z0X4|PDE3A_MOUSE cGMP-inhibited 3',5'-cyclic phosphodiesterase A OS=Mus musculus GN=Pde3a PE=1 SV=1	-25.9603	8	124.3	1141	31	0.210526	0.623777	18
c482	c482.a1	c482.a1.a1	sp|P12399|CTL2A_MOUSE Protein CTLA-2-alpha OS=Mus musculus GN=Ctla2a PE=2 SV=2	-30.8795	41	15.8	137	31	0.75	4.62341	14
c483	c483.a1	c483.a1.a1	sp|Q99KE1|MAOM_MOUSE NAD-dependent malic enzyme, mitochondrial OS=Mus musculus GN=Me2 PE=1 SV=1	-37.5778	19	65.7	589	31	0.24	0.737801	14
c484	c484.a1	c484.a1.a1	sp|Q5FWK3|RHG01_MOUSE Rho GTPase-activating protein 1 OS=Mus musculus GN=Arhgap1 PE=1 SV=1	-36.4603	22	50.3	439	31	0.388889	1.44844	18
c485	c485.a1	c485.a1.a1	sp|Q3V3R1|C1TM_MOUSE Monofunctional C1-tetrahydrofolate synthase, mitochondrial OS=Mus musculus GN=Mthfd1l PE=1 SV=2	-51.7927	19	105.5	977	31	0.288889	0.944862	13
c486	c486.a1	c486.a1.a1	sp|P0C191|GPVI_MOUSE Platelet glycoprotein VI OS=Mus musculus GN=Gp6 PE=1 SV=2	-30.4897	23	34.5	313	31	0.555556	2.59381	14
c487	c487.a1	c487.a1.a1	sp|O88746|TOM1_MOUSE Target of Myb protein 1 OS=Mus musculus GN=Tom1 PE=1 SV=1	-31.276	19	54.2	492	31	0.375	1.37137	16
c488	c488.a1	c488.a1.a1	sp|Q6ZWX6|IF2A_MOUSE Eukaryotic translation initiation factor 2 subunit 1 OS=Mus musculus GN=Eif2s1 PE=1 SV=3	-37.8762	26	36	315	30	0.444444	1.78256	14
c489	c489.a1	c489.a1.a1	sp|Q18PI6-3|SLAF5_MOUSE Isoform 3 of SLAM family member 5 OS=Mus musculus GN=Cd84	-27.7158	16	37.2	328	30	0.333333	1.15443	16
c489	c489.a1	c489.a1.a2	sp|Q18PI6|SLAF5_MOUSE SLAM family member 5 OS=Mus musculus GN=Cd84 PE=1 SV=1	-27.7158	16	37.3	329	30	0.333333	1.15443	16
c490	c490.a1	c490.a1.a1	sp|P23953|EST1C_MOUSE Carboxylesterase 1C OS=Mus musculus GN=Ces1c PE=1 SV=4	-42.5147	25	60.9	554	30	0.55	2.54813	13
c491	c491.a1	c491.a1.a1	sp|Q99PG4|RGS18_MOUSE Regulator of G-protein signaling 18 OS=Mus musculus GN=Rgs18 PE=1 SV=1	-24.777	35	27.5	235	30	0.6	2.98107	16
c492	c492.a1	c492.a1.a1	sp|Q76LS9-2|FA63A_MOUSE Isoform 2 of Ubiquitin carboxyl-terminal hydrolase MINDY-1 OS=Mus musculus GN=Fam63a	-44.6816	32	50.1	459	29	1	9	12
c492	c492.a1	c492.a1.a2	sp|Q76LS9|FA63A_MOUSE Ubiquitin carboxyl-terminal hydrolase MINDY-1 OS=Mus musculus GN=Fam63a PE=1 SV=1	-44.6816	31	51.1	468	29	1	9	12
c492	c492.a2	c492.a2.a1	sp|Q6PDI6|FA63B_MOUSE Ubiquitin carboxyl-terminal hydrolase MINDY-2 OS=Mus musculus GN=Fam63b PE=1 SV=1	-4.80024	3	65.5	601	2	0.111111	0.29155	1
c493	c493.a1	c493.a1.a1	sp|P45376|ALDR_MOUSE Aldose reductase OS=Mus musculus GN=Akr1b1 PE=1 SV=3	-31.8663	22	35.6	316	30	0.411765	1.58086	17
c494	c494.a1	c494.a1.a1	sp|P07309|TTHY_MOUSE Transthyretin OS=Mus musculus GN=Ttr PE=1 SV=1	-45.1806	62	15.7	147	30	1	9	16
c495	c495.a1	c495.a1.a1	sp|Q99JX3-2|GORS2_MOUSE Isoform 2 of Golgi reassembly-stacking protein 2 OS=Mus musculus GN=Gorasp2	-30.6595	18	39.5	383	30	0.5	2.16228	17
c495	c495.a1	c495.a1.a2	sp|Q99JX3|GORS2_MOUSE Golgi reassembly-stacking protein 2 OS=Mus musculus GN=Gorasp2 PE=1 SV=3	-30.6595	15	46.9	451	30	0.363636	1.31013	17
c496	c496.a1	c496.a1.a1	sp|Q9JIF7|COPB_MOUSE Coatomer subunit beta OS=Mus musculus GN=Copb1 PE=1 SV=1	-33.2239	13	106.9	953	30	0.227273	0.687612	13
c497	c497.a1	c497.a1.a1	sp|Q8K021|SCAM1_MOUSE Secretory carrier-associated membrane protein 1 OS=Mus musculus GN=Scamp1 PE=1 SV=1	-33.9246	30	37.9	338	30	0.636364	3.32876	14
c498	c498.a1	c498.a1.a1	sp|O08547|SC22B_MOUSE Vesicle-trafficking protein SEC22b OS=Mus musculus GN=Sec22b PE=1 SV=3	-23.6016	24	24.6	215	30	0.454545	1.84804	13
c499	c499.a1	c499.a1.a1	sp|Q61508|ECM1_MOUSE Extracellular matrix protein 1 OS=Mus musculus GN=Ecm1 PE=1 SV=2	-31.2074	16	62.7	559	30	0.285714	0.930698	15
c500	c500.a1	c500.a1.a1	sp|P57759|ERP29_MOUSE Endoplasmic reticulum resident protein 29 OS=Mus musculus GN=Erp29 PE=1 SV=2	-38.9981	47	28.7	262	30	0.909091	7.11131	14
c501	c501.a1	c501.a1.a1	sp|P70315|WASP_MOUSE Wiskott-Aldrich syndrome protein homolog OS=Mus musculus GN=Was PE=1 SV=1	-35.6879	20	54.1	520	29	0.5	2.16228	16
c502	c502.a1	c502.a1.a1	sp|Q9DBC7|KAP0_MOUSE cAMP-dependent protein kinase type I-alpha regulatory subunit OS=Mus musculus GN=Prkar1a PE=1 SV=3	-19.62	10	43.1	381	29	0.25	0.778279	16
c503	c503.a1	c503.a1.a1	sp|Q02013|AQP1_MOUSE Aquaporin-1 OS=Mus musculus GN=Aqp1 PE=1 SV=3	-27.8851	14	28.7	269	29	1.25	16.7828	17
c504	c504.a1	c504.a1.a1	sp|Q9D051|ODPB_MOUSE Pyruvate dehydrogenase E1 component subunit beta, mitochondrial OS=Mus musculus GN=Pdhb PE=1 SV=1	-51.1583	31	38.8	359	29	0.625	3.21697	15
c505	c505.a1	c505.a1.a1	sp|Q9R059|FHL3_MOUSE Four and a half LIM domains protein 3 OS=Mus musculus GN=Fhl3 PE=1 SV=2	-39.7622	28	31.7	289	29	0.615385	3.12463	12
c506	c506.a1	c506.a1.a1	sp|P99026|PSB4_MOUSE Proteasome subunit beta type-4 OS=Mus musculus GN=Psmb4 PE=1 SV=1	-35.4453	35	29	264	29	0.9	6.94328	14
c507	c507.a1	c507.a1.a1	sp|P21836|ACES_MOUSE Acetylcholinesterase OS=Mus musculus GN=Ache PE=1 SV=1	-37.504	17	68	614	29	0.363636	1.31013	16
c508	c508.a1	c508.a1.a1	sp|P08905|LYZ2_MOUSE Lysozyme C-2 OS=Mus musculus GN=Lyz2 PE=1 SV=2	-28.4519	26	16.6	148	29	0.8	5.30957	18
c509	c509.a1	c509.a1.a1	sp|Q8R5H1-2|UBP15_MOUSE Isoform 2 of Ubiquitin carboxyl-terminal hydrolase 15 OS=Mus musculus GN=Usp15	-27.6987	8	109.1	953	29	0.130435	0.350314	16
c509	c509.a1	c509.a1.a2	sp|Q8R5H1-5|UBP15_MOUSE Isoform 5 of Ubiquitin carboxyl-terminal hydrolase 15 OS=Mus musculus GN=Usp15	-27.6987	8	109	952	29	0.130435	0.350314	16
c509	c509.a1	c509.a1.a3	sp|Q8R5H1|UBP15_MOUSE Ubiquitin carboxyl-terminal hydrolase 15 OS=Mus musculus GN=Usp15 PE=1 SV=1	-27.6987	8	112.1	981	29	0.125	0.333521	16
c510	c510.a1	c510.a1.a1	sp|Q9ERL7|GMFG_MOUSE Glia maturation factor gamma OS=Mus musculus GN=Gmfg PE=1 SV=1	-23.4742	39	16.7	142	21	0.555556	2.59381	15
c510	c510.a2	c510.a2.a1	sp|Q9CQI3|GMFB_MOUSE Glia maturation factor beta OS=Mus musculus GN=Gmfb PE=1 SV=3	-14.3445	30	16.6	142	10	0.222222	0.668101	8
c511	c511.a1	c511.a1.a1	sp|Q62433|NDRG1_MOUSE Protein NDRG1 OS=Mus musculus GN=Ndrg1 PE=1 SV=1	-30.5205	23	42.9	394	28	0.5	2.16228	17
c512	c512.a1	c512.a1.a1	sp|P49710|HCLS1_MOUSE Hematopoietic lineage cell-specific protein OS=Mus musculus GN=Hcls1 PE=1 SV=2	-37.8981	20	54.1	486	28	0.5	2.16228	15
c513	c513.a1	c513.a1.a1	sp|Q60631|GRB2_MOUSE Growth factor receptor-bound protein 2 OS=Mus musculus GN=Grb2 PE=1 SV=1	-45.2566	47	25.1	217	28	0.75	4.62341	10
c514	c514.a1	c514.a1.a1	sp|Q8BYC6|TAOK3_MOUSE Serine/threonine-protein kinase TAO3 OS=Mus musculus GN=Taok3 PE=1 SV=2	-30.5671	9	105.1	898	28	0.162162	0.452654	15
c515	c515.a1	c515.a1.a1	sp|Q9CQT1|MTNA_MOUSE Methylthioribose-1-phosphate isomerase OS=Mus musculus GN=Mri1 PE=1 SV=1	-36.7803	31	39.3	369	28	0.444444	1.78256	16
c516	c516.a1	c516.a1.a1	sp|Q8CHT0|AL4A1_MOUSE Delta-1-pyrroline-5-carboxylate dehydrogenase, mitochondrial OS=Mus musculus GN=Aldh4a1 PE=1 SV=3	-32.5858	12	61.7	562	28	0.238095	0.730196	17
c517	c517.a1	c517.a1.a1	sp|Q9DCT2|NDUS3_MOUSE NADH dehydrogenase [ubiquinone] iron-sulfur protein 3, mitochondrial OS=Mus musculus GN=Ndufs3 PE=1 SV=2	-31.5301	24	30	263	28	0.454545	1.84804	16
c518	c518.a1	c518.a1.a1	sp|Q99L45|IF2B_MOUSE Eukaryotic translation initiation factor 2 subunit 2 OS=Mus musculus GN=Eif2s2 PE=1 SV=1	-25.353	20	38	331	28	0.277778	0.895736	15
c519	c519.a1	c519.a1.a1	sp|Q8BGQ7|SYAC_MOUSE Alanine--tRNA ligase, cytoplasmic OS=Mus musculus GN=Aars PE=1 SV=1	-54.1263	20	106.7	968	28	0.325	1.11349	18
c520	c520.a1	c520.a1.a1	sp|P47713|PA24A_MOUSE Cytosolic phospholipase A2 OS=Mus musculus GN=Pla2g4a PE=1 SV=1	-33.8455	13	85.1	748	28	0.310345	1.04336	15
c521	c521.a1	c521.a1.a1	sp|Q3TL44|NLRX1_MOUSE NLR family member X1 OS=Mus musculus GN=Nlrx1 PE=1 SV=1	-35.0181	11	107.6	975	28	0.210526	0.623777	16
c522	c522.a1	c522.a1.a1	sp|P97300-1|NPTN_MOUSE Isoform 1 of Neuroplastin OS=Mus musculus GN=Nptn	-21.1527	24	31.2	281	27	0.727273	4.3367	11
c522	c522.a1	c522.a1.a2	sp|P97300|NPTN_MOUSE Neuroplastin OS=Mus musculus GN=Nptn PE=1 SV=3	-21.1527	17	44.3	397	27	0.5	2.16228	11
c523	c523.a1	c523.a1.a1	sp|P12787|COX5A_MOUSE Cytochrome c oxidase subunit 5A, mitochondrial OS=Mus musculus GN=Cox5a PE=1 SV=2	-27.1447	46	16	146	27	0.625	3.21697	12
c524	c524.a1	c524.a1.a1	sp|O55042-2|SYUA_MOUSE Isoform 2 of Alpha-synuclein OS=Mus musculus GN=Snca	-33.3325	52	12.3	121	27	0.857143	6.19686	13
c524	c524.a1	c524.a1.a2	sp|O55042|SYUA_MOUSE Alpha-synuclein OS=Mus musculus GN=Snca PE=1 SV=2	-33.3325	45	14.4	140	27	1	9	13
c525	c525.a1	c525.a1.a1	sp|P51881|ADT2_MOUSE ADP/ATP translocase 2 OS=Mus musculus GN=Slc25a5 PE=1 SV=3	-30.3955	21	32.8	298	21	0.4	1.51189	10
c525	c525.a2	c525.a2.a1	sp|P48962|ADT1_MOUSE ADP/ATP translocase 1 OS=Mus musculus GN=Slc25a4 PE=1 SV=4	-11.392	10	32.8	298	12	0.176471	0.501311	7
c526	c526.a1	c526.a1.a1	sp|P06909|CFAH_MOUSE Complement factor H OS=Mus musculus GN=Cfh PE=1 SV=2	-52.8007	11	138.9	1234	27	0.234043	0.714125	7
c527	c527.a1	c527.a1.a1	sp|Q9JHU9|INO1_MOUSE Inositol-3-phosphate synthase 1 OS=Mus musculus GN=Isyna1 PE=1 SV=1	-40.2782	17	60.8	557	27	0.555556	2.59381	11
c528	c528.a1	c528.a1.a1	sp|Q02819|NUCB1_MOUSE Nucleobindin-1 OS=Mus musculus GN=Nucb1 PE=1 SV=2	-31.755	17	53.3	459	27	0.32	1.0893	13
c529	c529.a1	c529.a1.a1	sp|Q8BH95|ECHM_MOUSE Enoyl-CoA hydratase, mitochondrial OS=Mus musculus GN=Echs1 PE=1 SV=1	-22.7742	19	31.4	290	27	0.333333	1.15443	16
c530	c530.a1	c530.a1.a1	sp|P97370|AT1B3_MOUSE Sodium/potassium-transporting ATPase subunit beta-3 OS=Mus musculus GN=Atp1b3 PE=1 SV=1	-27.3383	25	31.7	278	27	0.384615	1.42446	15
c531	c531.a1	c531.a1.a1	sp|P09405|NUCL_MOUSE Nucleolin OS=Mus musculus GN=Ncl PE=1 SV=2	-64.3879	19	76.6	707	27	0.590909	2.8986	5
c532	c532.a1	c532.a1.a1	sp|P00405|COX2_MOUSE Cytochrome c oxidase subunit 2 OS=Mus musculus GN=Mtco2 PE=1 SV=1	-30.7489	27	25.9	227	27	1.33333	20.5443	13
c533	c533.a1	c533.a1.a1	sp|P47941|CRKL_MOUSE Crk-like protein OS=Mus musculus GN=Crkl PE=1 SV=2	-25.9431	25	33.7	303	27	0.357143	1.27585	14
c534	c534.a1	c534.a1.a1	sp|Q9CQ60|6PGL_MOUSE 6-phosphogluconolactonase OS=Mus musculus GN=Pgls PE=1 SV=1	-37.2945	61	27.2	257	27	1.1	11.5893	10
c535	c535.a1	c535.a1.a1	sp|O35887|CALU_MOUSE Calumenin OS=Mus musculus GN=Calu PE=1 SV=1	-20.4448	16	37	315	26	0.333333	1.15443	14
c536	c536.a1	c536.a1.a1	sp|P08226|APOE_MOUSE Apolipoprotein E OS=Mus musculus GN=Apoe PE=1 SV=2	-25.2552	26	35.8	311	26	0.571429	2.72759	12
c537	c537.a1	c537.a1.a1	sp|Q60857|SC6A4_MOUSE Sodium-dependent serotonin transporter OS=Mus musculus GN=Slc6a4 PE=1 SV=4	-22.2054	11	69.9	630	26	0.5	2.16228	15
c538	c538.a1	c538.a1.a1	sp|Q8BND5-2|QSOX1_MOUSE Isoform 2 of Sulfhydryl oxidase 1 OS=Mus musculus GN=Qsox1	-30.6334	13	73.1	661	26	0.242424	0.747528	16
c538	c538.a1	c538.a1.a2	sp|Q8BND5-3|QSOX1_MOUSE Isoform 3 of Sulfhydryl oxidase 1 OS=Mus musculus GN=Qsox1	-30.6334	15	63.2	568	26	0.275862	0.887392	16
c538	c538.a1	c538.a1.a3	sp|Q8BND5|QSOX1_MOUSE Sulfhydryl oxidase 1 OS=Mus musculus GN=Qsox1 PE=1 SV=1	-30.6334	12	82.6	748	26	0.242424	0.747528	16
c539	c539.a1	c539.a1.a1	sp|Q9QY76|VAPB_MOUSE Vesicle-associated membrane protein-associated protein B OS=Mus musculus GN=Vapb PE=1 SV=3	-17.7786	17	26.8	243	19	0.3	0.995262	11
c539	c539.a2	c539.a2.a1	sp|Q9WV55|VAPA_MOUSE Vesicle-associated membrane protein-associated protein A OS=Mus musculus GN=Vapa PE=1 SV=2	-18.307	26	27.8	249	16	0.363636	1.31013	10
c540	c540.a1	c540.a1.a1	sp|P17563|SBP1_MOUSE Selenium-binding protein 1 OS=Mus musculus GN=Selenbp1 PE=1 SV=2	-27.8106	17	52.4	472	26	0.206897	0.610262	15
c541	c541.a1	c541.a1.a1	sp|Q99MN1|SYK_MOUSE Lysine--tRNA ligase OS=Mus musculus GN=Kars PE=1 SV=1	-31.0966	17	67.7	595	26	0.333333	1.15443	14
c542	c542.a1	c542.a1.a1	sp|Q91W90|TXND5_MOUSE Thioredoxin domain-containing protein 5 OS=Mus musculus GN=Txndc5 PE=1 SV=2	-33.808	18	46.3	417	26	0.294118	0.968419	12
c543	c543.a1	c543.a1.a1	sp|P35979|RL12_MOUSE 60S ribosomal protein L12 OS=Mus musculus GN=Rpl12 PE=1 SV=2	-24.9628	45	17.7	165	26	1.14286	12.895	13
c544	c544.a1	c544.a1.a1	sp|P29788|VTNC_MOUSE Vitronectin OS=Mus musculus GN=Vtn PE=1 SV=2	-24.9303	17	54.7	478	26	0.333333	1.15443	14
c545	c545.a1	c545.a1.a1	sp|Q9R0P6|SC11A_MOUSE Signal peptidase complex catalytic subunit SEC11A OS=Mus musculus GN=Sec11a PE=1 SV=1	-7.50169	9	20.5	179	26	0.222222	0.668101	18
c546	c546.a1	c546.a1.a1	sp|P70296|PEBP1_MOUSE Phosphatidylethanolamine-binding protein 1 OS=Mus musculus GN=Pebp1 PE=1 SV=3	-27.3774	57	20.7	187	26	0.857143	6.19686	14
c547	c547.a1	c547.a1.a1	sp|Q8BWY3|ERF1_MOUSE Eukaryotic peptide chain release factor subunit 1 OS=Mus musculus GN=Etf1 PE=1 SV=4	-28.8678	15	48.9	437	26	0.285714	0.930698	14
c548	c548.a1	c548.a1.a1	sp|Q8R0Y6|AL1L1_MOUSE Cytosolic 10-formyltetrahydrofolate dehydrogenase OS=Mus musculus GN=Aldh1l1 PE=1 SV=1	-36.0491	14	98.5	902	26	0.195652	0.569106	13
c549	c549.a1	c549.a1.a1	sp|Q9JJU8|SH3L1_MOUSE SH3 domain-binding glutamic acid-rich-like protein OS=Mus musculus GN=Sh3bgrl PE=1 SV=1	-28.2167	60	12.7	114	26	0.75	4.62341	13
c550	c550.a1	c550.a1.a1	sp|Q01405|SC23A_MOUSE Protein transport protein Sec23A OS=Mus musculus GN=Sec23a PE=1 SV=2	-39.2527	16	86	765	26	0.290323	0.951293	15
c551	c551.a1	c551.a1.a1	sp|Q8R411|MYCT1_MOUSE Myc target protein 1 OS=Mus musculus GN=Myct1 PE=1 SV=1	-15.3095	19	21	188	25	0.5	2.16228	18
c552	c552.a1	c552.a1.a1	sp|P20491|FCERG_MOUSE High affinity immunoglobulin epsilon receptor subunit gamma OS=Mus musculus GN=Fcer1g PE=1 SV=1	-14.7443	25	9.6	86	25	2	99	18
c553	c553.a1	c553.a1.a1	sp|P63158|HMGB1_MOUSE High mobility group protein B1 OS=Mus musculus GN=Hmgb1 PE=1 SV=2	-50.3305	41	24.8	215	15	2	99	3
c553	c553.a2	c553.a2.a1	sp|P30681|HMGB2_MOUSE High mobility group protein B2 OS=Mus musculus GN=Hmgb2 PE=1 SV=3	-51.147	32	24.1	210	11	1.6	38.8107	2
c554	c554.a1	c554.a1.a1	sp|P48193-2|41_MOUSE Isoform 2 of Protein 4.1 OS=Mus musculus GN=Epb41	-36.8698	15	89.5	804	25	0.28125	0.910953	13
c554	c554.a1	c554.a1.a2	sp|P48193|41_MOUSE Protein 4.1 OS=Mus musculus GN=Epb41 PE=1 SV=2	-36.8698	14	95.7	858	25	0.257143	0.807769	13
c555	c555.a1	c555.a1.a1	sp|Q8CGC7|SYEP_MOUSE Bifunctional glutamate/proline--tRNA ligase OS=Mus musculus GN=Eprs PE=1 SV=4	-21.9361	4	169.8	1512	25	0.0704225	0.176041	14
c556	c556.a1	c556.a1.a1	sp|P20444|KPCA_MOUSE Protein kinase C alpha type OS=Mus musculus GN=Prkca PE=1 SV=3	-35.2551	17	76.7	672	25	0.32	1.0893	13
c557	c557.a1	c557.a1.a1	sp|Q9CQ62|DECR_MOUSE 2,4-dienoyl-CoA reductase, mitochondrial OS=Mus musculus GN=Decr1 PE=1 SV=1	-15.9059	13	36.1	335	25	0.1875	0.539927	15
c558	c558.a1	c558.a1.a1	sp|Q3UM45|PP1R7_MOUSE Protein phosphatase 1 regulatory subunit 7 OS=Mus musculus GN=Ppp1r7 PE=1 SV=2	-35.957	29	41.2	361	25	0.368421	1.33572	13
c559	c559.a1	c559.a1.a1	sp|O09061|PSB1_MOUSE Proteasome subunit beta type-1 OS=Mus musculus GN=Psmb1 PE=1 SV=1	-33.0894	46	26.3	240	25	0.75	4.62341	13
c560	c560.a1	c560.a1.a1	sp|Q99JX4|EIF3M_MOUSE Eukaryotic translation initiation factor 3 subunit M OS=Mus musculus GN=Eif3m PE=1 SV=1	-27.6672	18	42.4	374	25	0.3125	1.05353	13
c561	c561.a1	c561.a1.a1	sp|Q8VE70|PDC10_MOUSE Programmed cell death protein 10 OS=Mus musculus GN=Pdcd10 PE=1 SV=1	-29.3231	31	24.6	212	25	0.545455	2.51119	14
c562	c562.a1	c562.a1.a1	sp|Q08EC4-2|CASS4_MOUSE Isoform 2 of Cas scaffolding protein family member 4 OS=Mus musculus GN=Cass4	-34.1426	14	85.7	780	25	0.179487	0.511775	13
c562	c562.a1	c562.a1.a2	sp|Q08EC4|CASS4_MOUSE Cas scaffolding protein family member 4 OS=Mus musculus GN=Cass4 PE=1 SV=1	-34.1426	13	88.5	804	25	0.179487	0.511775	13
c563	c563.a1	c563.a1.a1	sp|Q8K4F0|CD226_MOUSE CD226 antigen OS=Mus musculus GN=Cd226 PE=2 SV=1	-27.8137	33	38	333	25	0.7	4.01187	16
c564	c564.a1	c564.a1.a1	sp|P00493|HPRT_MOUSE Hypoxanthine-guanine phosphoribosyltransferase OS=Mus musculus GN=Hprt1 PE=1 SV=3	-23.1996	29	24.5	218	25	0.363636	1.31013	11
c565	c565.a1	c565.a1.a1	sp|Q6PB93-2|GALT2_MOUSE Isoform 2 of Polypeptide N-acetylgalactosaminyltransferase 2 OS=Mus musculus GN=Galnt2	-43.4596	25	60.8	536	25	0.346154	1.21898	13
c565	c565.a1	c565.a1.a2	sp|Q6PB93|GALT2_MOUSE Polypeptide N-acetylgalactosaminyltransferase 2 OS=Mus musculus GN=Galnt2 PE=1 SV=1	-43.4596	23	64.4	570	25	0.346154	1.21898	13
c566	c566.a1	c566.a1.a1	sp|P36536|SAR1A_MOUSE GTP-binding protein SAR1a OS=Mus musculus GN=Sar1a PE=1 SV=1	-21.3868	22	22.3	198	23	0.555556	2.59381	18
c566	c566.a2	c566.a2.a1	sp|Q9CQC9|SAR1B_MOUSE GTP-binding protein SAR1b OS=Mus musculus GN=Sar1b PE=1 SV=1	-10.2211	17	22.3	198	19	0.375	1.37137	16
c567	c567.a1	c567.a1.a1	sp|Q7TMK9-2|HNRPQ_MOUSE Isoform 2 of Heterogeneous nuclear ribonucleoprotein Q OS=Mus musculus GN=Syncrip	-27.2545	11	62.5	562	25	0.217391	0.649648	12
c567	c567.a1	c567.a1.a2	sp|Q7TMK9|HNRPQ_MOUSE Heterogeneous nuclear ribonucleoprotein Q OS=Mus musculus GN=Syncrip PE=1 SV=2	-27.2545	10	69.5	623	25	0.208333	0.615598	12
c568	c568.a1	c568.a1.a1	sp|Q9D8U8|SNX5_MOUSE Sorting nexin-5 OS=Mus musculus GN=Snx5 PE=1 SV=1	-29.1626	16	46.7	404	25	0.285714	0.930698	15
c569	c569.a1	c569.a1.a1	sp|Q91YW3|DNJC3_MOUSE DnaJ homolog subfamily C member 3 OS=Mus musculus GN=Dnajc3 PE=1 SV=1	-42.3452	27	57.3	504	25	0.473684	1.97635	13
c570	c570.a1	c570.a1.a1	sp|Q9CZ30|OLA1_MOUSE Obg-like ATPase 1 OS=Mus musculus GN=Ola1 PE=1 SV=1	-27.6882	21	44.6	396	25	0.285714	0.930698	14
c571	c571.a1	c571.a1.a1	sp|Q8R001-2|MARE2_MOUSE Isoform 2 of Microtubule-associated protein RP/EB family member 2 OS=Mus musculus GN=Mapre2	-24.1359	27	36	317	24	0.727273	4.3367	11
c571	c571.a1	c571.a1.a2	sp|Q8R001|MARE2_MOUSE Microtubule-associated protein RP/EB family member 2 OS=Mus musculus GN=Mapre2 PE=1 SV=1	-24.1359	27	36.8	326	24	0.727273	4.3367	11
c572	c572.a1	c572.a1.a1	sp|P61089|UBE2N_MOUSE Ubiquitin-conjugating enzyme E2 N OS=Mus musculus GN=Ube2n PE=1 SV=1	-17.5349	30	17.1	152	24	0.375	1.37137	16
c573	c573.a1	c573.a1.a1	sp|Q99LX0|PARK7_MOUSE Protein deglycase DJ-1 OS=Mus musculus GN=Park7 PE=1 SV=1	-38.0114	78	19.9	189	24	1.42857	25.827	14
c574	c574.a1	c574.a1.a1	sp|P19221|THRB_MOUSE Prothrombin OS=Mus musculus GN=F2 PE=1 SV=1	-44.6802	19	70.1	618	24	0.44	1.75423	11
c575	c575.a1	c575.a1.a1	sp|Q9CY58-2|PAIRB_MOUSE Isoform 2 of Plasminogen activator inhibitor 1 RNA-binding protein OS=Mus musculus GN=Serbp1	-29.9255	15	42.8	392	24	0.25	0.778279	13
c575	c575.a1	c575.a1.a2	sp|Q9CY58-3|PAIRB_MOUSE Isoform 3 of Plasminogen activator inhibitor 1 RNA-binding protein OS=Mus musculus GN=Serbp1	-29.9255	15	42.1	386	24	0.266667	0.84785	13
c575	c575.a1	c575.a1.a3	sp|Q9CY58|PAIRB_MOUSE Plasminogen activator inhibitor 1 RNA-binding protein OS=Mus musculus GN=Serbp1 PE=1 SV=2	-29.9255	14	44.6	407	24	0.235294	0.719072	13
c576	c576.a1	c576.a1.a1	sp|P50518|VATE1_MOUSE V-type proton ATPase subunit E 1 OS=Mus musculus GN=Atp6v1e1 PE=1 SV=2	-19.9302	21	26.1	226	24	0.454545	1.84804	15
c577	c577.a1	c577.a1.a1	sp|P61082|UBC12_MOUSE NEDD8-conjugating enzyme Ubc12 OS=Mus musculus GN=Ube2m PE=1 SV=1	-18.2447	25	20.8	183	24	0.5	2.16228	15
c578	c578.a1	c578.a1.a1	sp|P61804|DAD1_MOUSE Dolichyl-diphosphooligosaccharide--protein glycosyltransferase subunit DAD1 OS=Mus musculus GN=Dad1 PE=1 SV=3	-16.2801	28	12.4	113	24	0.6	2.98107	16
c579	c579.a1	c579.a1.a1	sp|Q80WJ7|LYRIC_MOUSE Protein LYRIC OS=Mus musculus GN=Mtdh PE=1 SV=1	-36.1259	13	63.7	579	24	0.333333	1.15443	14
c580	c580.a1	c580.a1.a1	sp|Q91WU5|AS3MT_MOUSE Arsenite methyltransferase OS=Mus musculus GN=As3mt PE=1 SV=2	-29.0686	24	41.7	376	24	0.26087	0.823348	14
c581	c581.a1	c581.a1.a1	sp|P49442|INPP_MOUSE Inositol polyphosphate 1-phosphatase OS=Mus musculus GN=Inpp1 PE=1 SV=2	-36.7536	17	43.2	396	24	0.333333	1.15443	15
c582	c582.a1	c582.a1.a1	sp|Q9D7G0|PRPS1_MOUSE Ribose-phosphate pyrophosphokinase 1 OS=Mus musculus GN=Prps1 PE=1 SV=4	-25.8808	30	34.7	318	22	0.5	2.16228	12
c582	c582.a2	c582.a2.a1	sp|Q9CS42|PRPS2_MOUSE Ribose-phosphate pyrophosphokinase 2 OS=Mus musculus GN=Prps2 PE=1 SV=4	-14.6442	20	34.7	318	6	0.333333	1.15443	5
c583	c583.a1	c583.a1.a1	sp|B1AZP2-2|DLGP4_MOUSE Isoform 2 of Disks large-associated protein 4 OS=Mus musculus GN=Dlgap4	-38.2184	12	107.4	989	23	0.242424	0.747528	14
c583	c583.a1	c583.a1.a2	sp|B1AZP2-3|DLGP4_MOUSE Isoform 3 of Disks large-associated protein 4 OS=Mus musculus GN=Dlgap4	-38.2184	26	49.3	453	23	0.380952	1.4041	14
c583	c583.a1	c583.a1.a3	sp|B1AZP2|DLGP4_MOUSE Disks large-associated protein 4 OS=Mus musculus GN=Dlgap4 PE=1 SV=1	-38.2184	12	107.8	992	23	0.235294	0.719072	14
c584	c584.a1	c584.a1.a1	sp|P62897|CYC_MOUSE Cytochrome c, somatic OS=Mus musculus GN=Cycs PE=1 SV=2	-17.9398	32	11.5	105	23	0.8	5.30957	12
c585	c585.a1	c585.a1.a1	sp|O35609|SCAM3_MOUSE Secretory carrier-associated membrane protein 3 OS=Mus musculus GN=Scamp3 PE=1 SV=3	-23.0701	14	38.3	349	23	0.375	1.37137	14
c586	c586.a1	c586.a1.a1	sp|Q9DBH5|LMAN2_MOUSE Vesicular integral-membrane protein VIP36 OS=Mus musculus GN=Lman2 PE=1 SV=2	-40.9656	31	40.3	358	23	0.529412	2.38386	14
c587	c587.a1	c587.a1.a1	sp|Q9WV80|SNX1_MOUSE Sorting nexin-1 OS=Mus musculus GN=Snx1 PE=1 SV=1	-20.8552	9	58.8	522	19	0.2	0.584893	12
c587	c587.a2	c587.a2.a1	sp|Q9CWK8|SNX2_MOUSE Sorting nexin-2 OS=Mus musculus GN=Snx2 PE=1 SV=2	-18.5391	11	58.3	519	5	0.173913	0.492496	4
c588	c588.a1	c588.a1.a1	sp|Q923D2|BLVRB_MOUSE Flavin reductase (NADPH) OS=Mus musculus GN=Blvrb PE=1 SV=3	-34.566	43	22.1	206	23	0.875	6.49894	9
c589	c589.a1	c589.a1.a1	sp|P62827|RAN_MOUSE GTP-binding nuclear protein Ran OS=Mus musculus GN=Ran PE=1 SV=3	-23.7934	32	24.3	216	23	0.545455	2.51119	17
c590	c590.a1	c590.a1.a1	sp|Q6P9Q4|FHOD1_MOUSE FH1/FH2 domain-containing protein 1 OS=Mus musculus GN=Fhod1 PE=1 SV=3	-53.9681	15	129.4	1197	23	0.227273	0.687612	8
c591	c591.a1	c591.a1.a1	sp|O54957|LAT_MOUSE Linker for activation of T-cells family member 1 OS=Mus musculus GN=Lat PE=1 SV=1	-19.4195	25	25.9	242	23	0.833333	5.81292	14
c592	c592.a1	c592.a1.a1	sp|P01029|CO4B_MOUSE Complement C4-B OS=Mus musculus GN=C4b PE=1 SV=3	-38.9608	7	192.6	1738	23	0.140351	0.3815	11
c593	c593.a1	c593.a1.a1	sp|P17047-2|LAMP2_MOUSE Isoform LAMP-2B of Lysosome-associated membrane glycoprotein 2 OS=Mus musculus GN=Lamp2	-20.3619	17	45.7	416	23	0.461538	1.89427	16
c593	c593.a1	c593.a1.a2	sp|P17047-3|LAMP2_MOUSE Isoform LAMP-2C of Lysosome-associated membrane glycoprotein 2 OS=Mus musculus GN=Lamp2	-20.3619	17	45.5	415	23	0.428571	1.6827	16
c593	c593.a1	c593.a1.a3	sp|P17047|LAMP2_MOUSE Lysosome-associated membrane glycoprotein 2 OS=Mus musculus GN=Lamp2 PE=1 SV=2	-20.3619	17	45.6	415	23	0.428571	1.6827	16
c594	c594.a1	c594.a1.a1	sp|Q08351|TPOR_MOUSE Thrombopoietin receptor OS=Mus musculus GN=Mpl PE=2 SV=2	-25.1826	13	69.6	625	23	0.25	0.778279	14
c595	c595.a1	c595.a1.a1	sp|P47791-2|GSHR_MOUSE Isoform Cytoplasmic of Glutathione reductase, mitochondrial OS=Mus musculus GN=Gsr	-41.9392	24	50.9	474	23	0.352941	1.25393	13
c596	c596.a1	c596.a1.a1	sp|P60122|RUVB1_MOUSE RuvB-like 1 OS=Mus musculus GN=Ruvbl1 PE=1 SV=1	-31.1923	21	50.1	456	23	0.380952	1.4041	13
c597	c597.a1	c597.a1.a1	sp|P17225|PTBP1_MOUSE Polypyrimidine tract-binding protein 1 OS=Mus musculus GN=Ptbp1 PE=1 SV=2	-41.629	22	56.3	527	23	0.466667	1.92864	10
c598	c598.a1	c598.a1.a1	sp|Q9CQB5|CISD2_MOUSE CDGSH iron-sulfur domain-containing protein 2 OS=Mus musculus GN=Cisd2 PE=1 SV=1	-9.80743	19	15.2	135	23	0.25	0.778279	18
c599	c599.a1	c599.a1.a1	sp|P16381|DDX3L_MOUSE Putative ATP-dependent RNA helicase Pl10 OS=Mus musculus GN=D1Pas1 PE=1 SV=1	-37.0901	15	73	660	23	0.242424	0.747528	12
c600	c600.a1	c600.a1.a1	sp|Q3U7R1|ESYT1_MOUSE Extended synaptotagmin-1 OS=Mus musculus GN=Esyt1 PE=1 SV=2	-20.233	9	121.3	1092	23	0.153846	0.425103	13
c601	c601.a1	c601.a1.a1	sp|Q9QZE5|COPG1_MOUSE Coatomer subunit gamma-1 OS=Mus musculus GN=Copg1 PE=1 SV=1	-26.4393	6	97.3	874	19	0.097561	0.251875	12
c601	c601.a2	c601.a2.a1	sp|Q9QXK3-4|COPG2_MOUSE Isoform 4 of Coatomer subunit gamma-2 OS=Mus musculus GN=Copg2	-24.97	5	97.4	870	16	0.075	0.188502	8
c601	c601.a2	c601.a2.a2	sp|Q9QXK3|COPG2_MOUSE Coatomer subunit gamma-2 OS=Mus musculus GN=Copg2 PE=1 SV=1	-24.97	5	97.5	871	16	0.075	0.188502	8
c602	c602.a1	c602.a1.a1	sp|O35566|CD151_MOUSE CD151 antigen OS=Mus musculus GN=Cd151 PE=1 SV=2	-18.8473	12	28.1	253	22	0.5	2.16228	17
c603	c603.a1	c603.a1.a1	sp|Q9JIW9|RALB_MOUSE Ras-related protein Ral-B OS=Mus musculus GN=Ralb PE=1 SV=1	-20.283	27	23.3	206	21	0.857143	6.19686	9
c603	c603.a2	c603.a2.a1	sp|P63321|RALA_MOUSE Ras-related protein Ral-A OS=Mus musculus GN=Rala PE=1 SV=1	-10.0933	15	23.5	206	12	0.428571	1.6827	8
c604	c604.a1	c604.a1.a1	sp|Q9D358|PPAC_MOUSE Low molecular weight phosphotyrosine protein phosphatase OS=Mus musculus GN=Acp1 PE=1 SV=3	-15.5186	23	18.1	158	22	0.5	2.16228	16
c605	c605.a1	c605.a1.a1	sp|Q8BR63|F177A_MOUSE Protein FAM177A1 OS=Mus musculus GN=Fam177a1 PE=1 SV=1	-18.1774	19	23.5	207	22	0.333333	1.15443	15
c606	c606.a1	c606.a1.a1	sp|Q06185|ATP5I_MOUSE ATP synthase subunit e, mitochondrial OS=Mus musculus GN=Atp5i PE=1 SV=2	-20.7702	54	8.2	71	22	1.33333	20.5443	14
c607	c607.a1	c607.a1.a1	sp|Q571I9|A16A1_MOUSE Aldehyde dehydrogenase family 16 member A1 OS=Mus musculus GN=Aldh16a1 PE=1 SV=2	-29.2014	11	84.6	802	22	0.238095	0.730196	16
c608	c608.a1	c608.a1.a1	sp|P62192|PRS4_MOUSE 26S protease regulatory subunit 4 OS=Mus musculus GN=Psmc1 PE=1 SV=1	-30.7907	21	49.1	440	22	0.318182	1.08057	13
c609	c609.a1	c609.a1.a1	sp|Q9CQI6|COTL1_MOUSE Coactosin-like protein OS=Mus musculus GN=Cotl1 PE=1 SV=3	-29.3858	62	15.9	142	22	1	9	11
c610	c610.a1	c610.a1.a1	sp|O70251|EF1B_MOUSE Elongation factor 1-beta OS=Mus musculus GN=Eef1b PE=1 SV=5	-28.5076	38	24.6	225	22	0.5	2.16228	16
c611	c611.a1	c611.a1.a1	sp|P97765|WBP2_MOUSE WW domain-binding protein 2 OS=Mus musculus GN=Wbp2 PE=1 SV=1	-21.2967	18	27.9	261	22	0.666667	3.64159	14
c612	c612.a1	c612.a1.a1	sp|O88544|CSN4_MOUSE COP9 signalosome complex subunit 4 OS=Mus musculus GN=Cops4 PE=1 SV=1	-31.9184	24	46.2	406	22	0.269231	0.858792	11
c613	c613.a1	c613.a1.a1	sp|Q9CR68|UCRI_MOUSE Cytochrome b-c1 complex subunit Rieske, mitochondrial OS=Mus musculus GN=Uqcrfs1 PE=1 SV=1	-20.3692	24	29.3	274	21	0.384615	1.42446	13
c614	c614.a1	c614.a1.a1	sp|Q8VEK0|CC50A_MOUSE Cell cycle control protein 50A OS=Mus musculus GN=Tmem30a PE=1 SV=1	-20.2778	13	40.9	364	21	0.444444	1.78256	14
c615	c615.a1	c615.a1.a1	sp|Q7TMF3|NDUAC_MOUSE NADH dehydrogenase [ubiquinone] 1 alpha subcomplex subunit 12 OS=Mus musculus GN=Ndufa12 PE=1 SV=2	-17.0221	25	17	145	21	0.3	0.995262	14
c616	c616.a1	c616.a1.a1	sp|Q5PR69-2|K1211_MOUSE Isoform 2 of Uncharacterized protein KIAA1211 OS=Mus musculus GN=Kiaa1211	-33.4667	14	131.7	1204	21	0.222222	0.668101	10
c616	c616.a1	c616.a1.a2	sp|Q5PR69|K1211_MOUSE Uncharacterized protein KIAA1211 OS=Mus musculus GN=Kiaa1211 PE=1 SV=3	-33.4667	14	132.1	1207	21	0.222222	0.668101	10
c617	c617.a1	c617.a1.a1	sp|P10639|THIO_MOUSE Thioredoxin OS=Mus musculus GN=Txn PE=1 SV=3	-21.2766	31	11.6	105	21	0.666667	3.64159	15
c618	c618.a1	c618.a1.a1	sp|P58281-2|OPA1_MOUSE Isoform 2 of Dynamin-like 120 kDa protein, mitochondrial OS=Mus musculus GN=Opa1	-45.5374	12	115.4	997	21	0.176471	0.501311	14
c618	c618.a1	c618.a1.a2	sp|P58281|OPA1_MOUSE Dynamin-like 120 kDa protein, mitochondrial OS=Mus musculus GN=Opa1 PE=1 SV=1	-45.5374	12	111.1	960	21	0.183673	0.526418	14
c619	c619.a1	c619.a1.a1	sp|D3YVF0|AKAP5_MOUSE A-kinase anchor protein 5 OS=Mus musculus GN=Akap5 PE=1 SV=2	-23.8242	12	79.2	745	21	0.208333	0.615598	12
c620	c620.a1	c620.a1.a1	sp|P19783|COX41_MOUSE Cytochrome c oxidase subunit 4 isoform 1, mitochondrial OS=Mus musculus GN=Cox4i1 PE=1 SV=2	-22.1403	31	19.4	169	21	0.666667	3.64159	10
c621	c621.a1	c621.a1.a1	sp|Q9WUA3|PFKAP_MOUSE ATP-dependent 6-phosphofructokinase, platelet type OS=Mus musculus GN=Pfkp PE=1 SV=1	-33.1371	10	85.3	784	21	0.172414	0.487352	13
c622	c622.a1	c622.a1.a1	sp|P62748|HPCL1_MOUSE Hippocalcin-like protein 1 OS=Mus musculus GN=Hpcal1 PE=1 SV=2	-28.1711	30	22.2	193	21	0.461538	1.89427	13
c623	c623.a1	c623.a1.a1	sp|Q62087|PON3_MOUSE Serum paraoxonase/lactonase 3 OS=Mus musculus GN=Pon3 PE=1 SV=2	-23.1364	25	39.2	354	21	0.454545	1.84804	15
c624	c624.a1	c624.a1.a1	sp|Q9EQH3|VPS35_MOUSE Vacuolar protein sorting-associated protein 35 OS=Mus musculus GN=Vps35 PE=1 SV=1	-25.4565	10	91.5	796	21	0.153846	0.425103	13
c625	c625.a1	c625.a1.a1	sp|Q8QZY6|TSN14_MOUSE Tetraspanin-14 OS=Mus musculus GN=Tspan14 PE=1 SV=1	-19.3628	23	30.6	270	21	0.6	2.98107	13
c626	c626.a1	c626.a1.a1	sp|Q8BRF7-3|SCFD1_MOUSE Isoform 3 of Sec1 family domain-containing protein 1 OS=Mus musculus GN=Scfd1	-28.0955	16	67.3	597	21	0.222222	0.668101	12
c626	c626.a1	c626.a1.a2	sp|Q8BRF7|SCFD1_MOUSE Sec1 family domain-containing protein 1 OS=Mus musculus GN=Scfd1 PE=1 SV=1	-28.0955	15	72.2	639	21	0.214286	0.637894	12
c627	c627.a1	c627.a1.a1	sp|Q9CYG7|TOM34_MOUSE Mitochondrial import receptor subunit TOM34 OS=Mus musculus GN=Tomm34 PE=1 SV=1	-29.6624	19	34.2	309	21	0.277778	0.895736	11
c628	c628.a1	c628.a1.a1	sp|Q61206|PA1B2_MOUSE Platelet-activating factor acetylhydrolase IB subunit beta OS=Mus musculus GN=Pafah1b2 PE=1 SV=2	-13.6991	15	25.5	229	21	0.5	2.16228	15
c629	c629.a1	c629.a1.a1	sp|Q9QZD9|EIF3I_MOUSE Eukaryotic translation initiation factor 3 subunit I OS=Mus musculus GN=Eif3i PE=1 SV=1	-16.6932	15	36.4	325	20	0.235294	0.719072	13
c630	c630.a1	c630.a1.a1	sp|Q61768|KINH_MOUSE Kinesin-1 heavy chain OS=Mus musculus GN=Kif5b PE=1 SV=3	-50.1029	10	109.4	963	20	0.148148	0.406527	7
c631	c631.a1	c631.a1.a1	sp|Q9D3D9|ATPD_MOUSE ATP synthase subunit delta, mitochondrial OS=Mus musculus GN=Atp5d PE=1 SV=1	-23.5068	33	17.5	168	20	1	9	13
c632	c632.a1	c632.a1.a1	sp|Q9CX34|SGT1_MOUSE Protein SGT1 homolog OS=Mus musculus GN=Sugt1 PE=1 SV=3	-31.2655	26	38	336	20	0.333333	1.15443	14
c633	c633.a1	c633.a1.a1	sp|Q6GQT9|NOMO1_MOUSE Nodal modulator 1 OS=Mus musculus GN=Nomo1 PE=1 SV=1	-33.5318	9	133.2	1214	20	0.137255	0.371687	9
c634	c634.a1	c634.a1.a1	sp|Q6Y685|TACC1_MOUSE Transforming acidic coiled-coil-containing protein 1 OS=Mus musculus GN=Tacc1 PE=1 SV=1	-32.7873	15	83.8	774	20	0.264706	0.839526	10
c635	c635.a1	c635.a1.a1	sp|Q9R0Q7|TEBP_MOUSE Prostaglandin E synthase 3 OS=Mus musculus GN=Ptges3 PE=1 SV=1	-15.1363	24	18.6	160	20	0.428571	1.6827	16
c636	c636.a1	c636.a1.a1	sp|Q3UPL0-2|SC31A_MOUSE Isoform 2 of Protein transport protein Sec31A OS=Mus musculus GN=Sec31a	-33.6799	11	129.3	1191	20	0.243243	0.750827	11
c636	c636.a1	c636.a1.a2	sp|Q3UPL0|SC31A_MOUSE Protein transport protein Sec31A OS=Mus musculus GN=Sec31a PE=1 SV=2	-33.6799	11	133.4	1230	20	0.236842	0.725211	11
c637	c637.a1	c637.a1.a1	sp|Q3T9M1-3|MFS2B_MOUSE Isoform 3 of Major facilitator superfamily domain-containing protein 2B OS=Mus musculus GN=Mfsd2b	-13.5229	11	37.2	347	20	0.4	1.51189	16
c637	c637.a1	c637.a1.a2	sp|Q3T9M1|MFS2B_MOUSE Major facilitator superfamily domain-containing protein 2B OS=Mus musculus GN=Mfsd2b PE=2 SV=1	-13.5229	8	52.7	494	20	0.333333	1.15443	16
c638	c638.a1	c638.a1.a1	sp|Q921M7|FA49B_MOUSE Protein FAM49B OS=Mus musculus GN=Fam49b PE=1 SV=1	-32.4213	26	36.7	324	20	0.352941	1.25393	11
c639	c639.a1	c639.a1.a1	sp|Q9DB29|IAH1_MOUSE Isoamyl acetate-hydrolyzing esterase 1 homolog OS=Mus musculus GN=Iah1 PE=1 SV=1	-32.2868	25	27.9	249	20	0.5	2.16228	15
c640	c640.a1	c640.a1.a1	sp|P46935|NEDD4_MOUSE E3 ubiquitin-protein ligase NEDD4 OS=Mus musculus GN=Nedd4 PE=1 SV=3	-19.483	5	102.5	887	20	0.111111	0.29155	14
c641	c641.a1	c641.a1.a1	sp|O35143|ATIF1_MOUSE ATPase inhibitor, mitochondrial OS=Mus musculus GN=Atpif1 PE=1 SV=2	-36.1437	45	12.1	106	19	2	99	7
c642	c642.a1	c642.a1.a1	sp|P63168|DYL1_MOUSE Dynein light chain 1, cytoplasmic OS=Mus musculus GN=Dynll1 PE=1 SV=1	-19.2628	36	10.3	89	15	0.75	4.62341	10
c642	c642.a2	c642.a2.a1	sp|Q9D0M5|DYL2_MOUSE Dynein light chain 2, cytoplasmic OS=Mus musculus GN=Dynll2 PE=1 SV=1	-11.1302	36	10.3	89	7	0.75	4.62341	5
c643	c643.a1	c643.a1.a1	sp|P32261|ANT3_MOUSE Antithrombin-III OS=Mus musculus GN=Serpinc1 PE=1 SV=1	-28.6051	18	51.9	465	19	0.28	0.905461	9
c644	c644.a1	c644.a1.a1	sp|P01872-2|IGHM_MOUSE Isoform 2 of Ig mu chain C region OS=Mus musculus GN=Ighm	-34.7576	22	52.4	475	19	0.470588	1.95521	10
c644	c644.a1	c644.a1.a2	sp|P01872|IGHM_MOUSE Ig mu chain C region OS=Mus musculus GN=Ighm PE=1 SV=2	-34.7576	23	49.8	454	19	0.444444	1.78256	10
c645	c645.a1	c645.a1.a1	sp|P28474|ADHX_MOUSE Alcohol dehydrogenase class-3 OS=Mus musculus GN=Adh5 PE=1 SV=3	-25.911	23	39.4	374	19	0.4	1.51189	9
c646	c646.a1	c646.a1.a1	sp|Q9Z0H4-2|CELF2_MOUSE Isoform 2 of CUGBP Elav-like family member 2 OS=Mus musculus GN=Celf2	-23.0217	12	55.3	520	19	0.333333	1.15443	12
c646	c646.a1	c646.a1.a2	sp|Q9Z0H4-6|CELF2_MOUSE Isoform 6 of CUGBP Elav-like family member 2 OS=Mus musculus GN=Celf2	-23.0217	12	55.7	524	19	0.333333	1.15443	12
c647	c647.a1	c647.a1.a1	sp|Q9D1D4|TMEDA_MOUSE Transmembrane emp24 domain-containing protein 10 OS=Mus musculus GN=Tmed10 PE=1 SV=1	-28.7413	27	24.8	219	19	0.555556	2.59381	13
c648	c648.a1	c648.a1.a1	sp|Q61147|CERU_MOUSE Ceruloplasmin OS=Mus musculus GN=Cp PE=1 SV=2	-34.4602	11	120.9	1061	19	0.214286	0.637894	8
c649	c649.a1	c649.a1.a1	sp|Q9CPU0|LGUL_MOUSE Lactoylglutathione lyase OS=Mus musculus GN=Glo1 PE=1 SV=3	-26.6103	48	20.7	184	19	0.666667	3.64159	12
c650	c650.a1	c650.a1.a1	sp|Q6YGZ1|HPSE_MOUSE Heparanase OS=Mus musculus GN=Hpse PE=1 SV=3	-19.0184	10	59.9	535	19	0.2	0.584893	14
c651	c651.a1	c651.a1.a1	sp|P97465|DOK1_MOUSE Docking protein 1 OS=Mus musculus GN=Dok1 PE=1 SV=2	-22.1246	16	52.3	482	19	0.222222	0.668101	14
c652	c652.a1	c652.a1.a1	sp|Q9CPQ3|TOM22_MOUSE Mitochondrial import receptor subunit TOM22 homolog OS=Mus musculus GN=Tomm22 PE=1 SV=3	-27.1745	40	15.5	142	19	0.5	2.16228	13
c653	c653.a1	c653.a1.a1	sp|P61924|COPZ1_MOUSE Coatomer subunit zeta-1 OS=Mus musculus GN=Copz1 PE=1 SV=1	-24.7345	41	20.1	177	19	1.4	24.1189	14
c654	c654.a1	c654.a1.a1	sp|Q6P9J9|ANO6_MOUSE Anoctamin-6 OS=Mus musculus GN=Ano6 PE=1 SV=1	-31.1886	10	106.1	911	18	0.194444	0.564748	14
c655	c655.a1	c655.a1.a1	sp|Q9EPB4|ASC_MOUSE Apoptosis-associated speck-like protein containing a CARD OS=Mus musculus GN=Pycard PE=1 SV=1	-24.5121	43	21.4	193	18	0.454545	1.84804	10
c656	c656.a1	c656.a1.a1	sp|Q9QYJ0|DNJA2_MOUSE DnaJ homolog subfamily A member 2 OS=Mus musculus GN=Dnaja2 PE=1 SV=1	-22.6577	14	45.6	412	18	0.25	0.778279	10
c657	c657.a1	c657.a1.a1	sp|Q99J77|SIAS_MOUSE Sialic acid synthase OS=Mus musculus GN=Nans PE=1 SV=1	-26.9024	20	39.9	359	18	0.416667	1.61016	12
c658	c658.a1	c658.a1.a1	sp|Q80UG2|PLXA4_MOUSE Plexin-A4 OS=Mus musculus GN=Plxna4 PE=1 SV=3	-27.1239	6	212.2	1893	18	0.101266	0.2626	9
c659	c659.a1	c659.a1.a1	sp|Q8JZQ9|EIF3B_MOUSE Eukaryotic translation initiation factor 3 subunit B OS=Mus musculus GN=Eif3b PE=1 SV=1	-25.8991	12	91.2	803	18	0.138889	0.376857	11
c660	c660.a1	c660.a1.a1	sp|Q7TQI3|OTUB1_MOUSE Ubiquitin thioesterase OTUB1 OS=Mus musculus GN=Otub1 PE=1 SV=2	-23.2537	20	31.2	271	18	0.416667	1.61016	16
c661	c661.a1	c661.a1.a1	sp|Q9D1E6|TBCB_MOUSE Tubulin-folding cofactor B OS=Mus musculus GN=Tbcb PE=1 SV=2	-12.5686	11	27.3	244	18	0.133333	0.359356	13
c662	c662.a1	c662.a1.a1	sp|P70670|NACAM_MOUSE Nascent polypeptide-associated complex subunit alpha, muscle-specific form OS=Mus musculus GN=Naca PE=1 SV=2	-31.8132	3	220.2	2187	18	0.0555556	0.136464	9
c663	c663.a1	c663.a1.a1	sp|O35226-4|PSMD4_MOUSE Isoform Rpn10D of 26S proteasome non-ATPase regulatory subunit 4 OS=Mus musculus GN=Psmd4	-18.0251	20	37.9	349	15	0.307692	1.03092	13
c663	c663.a1	c663.a1.a2	sp|O35226|PSMD4_MOUSE 26S proteasome non-ATPase regulatory subunit 4 OS=Mus musculus GN=Psmd4 PE=1 SV=1	-18.0251	18	40.6	376	15	0.333333	1.15443	13
c663	c663.a2	c663.a2.a1	sp|O35226-2|PSMD4_MOUSE Isoform Rpn10B of 26S proteasome non-ATPase regulatory subunit 4 OS=Mus musculus GN=Psmd4	-14.0762	19	40.9	379	9	0.307692	1.03092	7
c663	c663.a2	c663.a2.a2	sp|O35226-3|PSMD4_MOUSE Isoform Rpn10C of 26S proteasome non-ATPase regulatory subunit 4 OS=Mus musculus GN=Psmd4	-14.0762	20	39.5	368	9	0.285714	0.930698	7
c664	c664.a1	c664.a1.a1	sp|Q9ER00|STX12_MOUSE Syntaxin-12 OS=Mus musculus GN=Stx12 PE=1 SV=1	-27.2679	28	31.1	274	18	0.545455	2.51119	14
c665	c665.a1	c665.a1.a1	sp|Q9CQR6|PPP6_MOUSE Serine/threonine-protein phosphatase 6 catalytic subunit OS=Mus musculus GN=Ppp6c PE=1 SV=1	-25.9252	27	35.1	305	18	0.5	2.16228	11
c666	c666.a1	c666.a1.a1	sp|Q9CY50|SSRA_MOUSE Translocon-associated protein subunit alpha OS=Mus musculus GN=Ssr1 PE=1 SV=1	-16.6421	9	32	286	18	0.25	0.778279	16
c667	c667.a1	c667.a1.a1	sp|P42567|EPS15_MOUSE Epidermal growth factor receptor substrate 15 OS=Mus musculus GN=Eps15 PE=1 SV=1	-22.0693	8	98.3	897	18	0.128205	0.343399	12
c668	c668.a1	c668.a1.a1	sp|Q91V76|CK054_MOUSE Ester hydrolase C11orf54 homolog OS=Mus musculus PE=1 SV=1	-25.2334	27	34.9	315	18	0.416667	1.61016	13
c669	c669.a1	c669.a1.a1	sp|P63325|RS10_MOUSE 40S ribosomal protein S10 OS=Mus musculus GN=Rps10 PE=1 SV=1	-26.5926	23	18.8	165	18	0.571429	2.72759	9
c670	c670.a1	c670.a1.a1	sp|Q9JK48-2|SHLB1_MOUSE Isoform 2 of Endophilin-B1 OS=Mus musculus GN=Sh3glb1	-18.2829	11	43.1	386	18	0.307692	1.03092	11
c670	c670.a1	c670.a1.a2	sp|Q9JK48|SHLB1_MOUSE Endophilin-B1 OS=Mus musculus GN=Sh3glb1 PE=1 SV=1	-18.2829	12	40.7	365	18	0.333333	1.15443	11
c671	c671.a1	c671.a1.a1	sp|Q9JK23|PSMG1_MOUSE Proteasome assembly chaperone 1 OS=Mus musculus GN=Psmg1 PE=1 SV=1	-12.5374	8	33	289	18	0.272727	0.873817	12
c672	c672.a1	c672.a1.a1	sp|Q8BGD9|IF4B_MOUSE Eukaryotic translation initiation factor 4B OS=Mus musculus GN=Eif4b PE=1 SV=1	-27.9506	10	68.7	611	17	0.263158	0.832981	8
c673	c673.a1	c673.a1.a1	sp|Q9QUR6|PPCE_MOUSE Prolyl endopeptidase OS=Mus musculus GN=Prep PE=1 SV=1	-15.2319	6	80.6	710	17	0.0789474	0.199354	12
c674	c674.a1	c674.a1.a1	sp|P42227-2|STAT3_MOUSE Isoform Stat3B of Signal transducer and activator of transcription 3 OS=Mus musculus GN=Stat3	-19.8239	7	83	722	17	0.0833333	0.211528	10
c674	c674.a1	c674.a1.a2	sp|P42227-3|STAT3_MOUSE Isoform Del-701 of Signal transducer and activator of transcription 3 OS=Mus musculus GN=Stat3	-19.8239	7	87.8	769	17	0.0833333	0.211528	10
c674	c674.a1	c674.a1.a3	sp|P42227|STAT3_MOUSE Signal transducer and activator of transcription 3 OS=Mus musculus GN=Stat3 PE=1 SV=2	-19.8239	7	87.9	770	17	0.0833333	0.211528	10
c675	c675.a1	c675.a1.a1	sp|O55023|IMPA1_MOUSE Inositol monophosphatase 1 OS=Mus musculus GN=Impa1 PE=1 SV=1	-21.0973	20	30.3	277	17	0.384615	1.42446	12
c676	c676.a1	c676.a1.a1	sp|O70492|SNX3_MOUSE Sorting nexin-3 OS=Mus musculus GN=Snx3 PE=1 SV=3	-11.8582	20	18.7	162	17	0.333333	1.15443	14
c677	c677.a1	c677.a1.a1	sp|P23591|FCL_MOUSE GDP-L-fucose synthase OS=Mus musculus GN=Tsta3 PE=1 SV=3	-14.9809	8	35.8	321	17	0.125	0.333521	13
c678	c678.a1	c678.a1.a1	sp|Q9JI46|NUDT3_MOUSE Diphosphoinositol polyphosphate phosphohydrolase 1 OS=Mus musculus GN=Nudt3 PE=1 SV=1	-16.9908	35	18.9	168	17	0.714286	4.17947	11
c679	c679.a1	c679.a1.a1	sp|Q9DCH4|EIF3F_MOUSE Eukaryotic translation initiation factor 3 subunit F OS=Mus musculus GN=Eif3f PE=1 SV=2	-19.5058	11	37.9	361	17	0.230769	0.701254	14
c680	c680.a1	c680.a1.a1	sp|Q6X893-2|CTL1_MOUSE Isoform 2 of Choline transporter-like protein 1 OS=Mus musculus GN=Slc44a1	-26.371	9	79.9	718	17	0.166667	0.467799	13
c680	c680.a1	c680.a1.a2	sp|Q6X893|CTL1_MOUSE Choline transporter-like protein 1 OS=Mus musculus GN=Slc44a1 PE=1 SV=3	-26.371	10	72.9	653	17	0.166667	0.467799	13
c681	c681.a1	c681.a1.a1	sp|Q9JKB1|UCHL3_MOUSE Ubiquitin carboxyl-terminal hydrolase isozyme L3 OS=Mus musculus GN=Uchl3 PE=1 SV=2	-27.1258	37	26.1	230	17	0.5	2.16228	11
c682	c682.a1	c682.a1.a1	sp|Q6P5E4|UGGG1_MOUSE UDP-glucose:glycoprotein glucosyltransferase 1 OS=Mus musculus GN=Uggt1 PE=1 SV=4	-27.3902	8	176.2	1551	17	0.114754	0.302429	8
c683	c683.a1	c683.a1.a1	sp|P63037|DNJA1_MOUSE DnaJ homolog subfamily A member 1 OS=Mus musculus GN=Dnaja1 PE=1 SV=1	-16.8762	15	44.7	397	17	0.357143	1.27585	14
c684	c684.a1	c684.a1.a1	sp|P53810|PIPNA_MOUSE Phosphatidylinositol transfer protein alpha isoform OS=Mus musculus GN=Pitpna PE=1 SV=2	-14.1669	15	31.8	271	17	0.235294	0.719072	9
c685	c685.a1	c685.a1.a1	sp|Q9ESP1|SDF2L_MOUSE Stromal cell-derived factor 2-like protein 1 OS=Mus musculus GN=Sdf2l1 PE=1 SV=2	-23.5215	29	23.6	221	16	0.4	1.51189	11
c686	c686.a1	c686.a1.a1	sp|P14733|LMNB1_MOUSE Lamin-B1 OS=Mus musculus GN=Lmnb1 PE=1 SV=3	-43.862	19	66.6	588	16	0.34375	1.20673	7
c687	c687.a1	c687.a1.a1	sp|Q99LF4|RTCB_MOUSE tRNA-splicing ligase RtcB homolog OS=Mus musculus GN=Rtcb PE=1 SV=1	-14.5058	9	55.1	505	16	0.181818	0.519911	11
c688	c688.a1	c688.a1.a1	sp|P06745|G6PI_MOUSE Glucose-6-phosphate isomerase OS=Mus musculus GN=Gpi PE=1 SV=4	-23.5453	14	62.6	558	16	0.315789	1.06914	12
c689	c689.a1	c689.a1.a1	sp|Q64433|CH10_MOUSE 10 kDa heat shock protein, mitochondrial OS=Mus musculus GN=Hspe1 PE=1 SV=2	-18.271	34	10.9	102	16	0.666667	3.64159	10
c690	c690.a1	c690.a1.a1	sp|Q9CQX2|CYB5B_MOUSE Cytochrome b5 type B OS=Mus musculus GN=Cyb5b PE=1 SV=1	-23.1135	38	16.2	146	16	0.6	2.98107	14
c691	c691.a1	c691.a1.a1	sp|P07356|ANXA2_MOUSE Annexin A2 OS=Mus musculus GN=Anxa2 PE=1 SV=2	-37.3031	32	38.6	339	16	0.55	2.54813	2
c692	c692.a1	c692.a1.a1	sp|O89100|GRAP2_MOUSE GRB2-related adaptor protein 2 OS=Mus musculus GN=Grap2 PE=1 SV=1	-31.419	34	36.7	322	16	0.444444	1.78256	12
c693	c693.a1	c693.a1.a1	sp|Q9R1P3|PSB2_MOUSE Proteasome subunit beta type-2 OS=Mus musculus GN=Psmb2 PE=1 SV=1	-24.0988	35	22.8	201	16	0.555556	2.59381	11
c694	c694.a1	c694.a1.a1	sp|Q9WVJ2|PSD13_MOUSE 26S proteasome non-ATPase regulatory subunit 13 OS=Mus musculus GN=Psmd13 PE=1 SV=1	-20.5979	19	42.7	376	16	0.318182	1.08057	13
c695	c695.a1	c695.a1.a1	sp|O08688|CAN5_MOUSE Calpain-5 OS=Mus musculus GN=Capn5 PE=1 SV=1	-21.271	14	72.8	640	16	0.15625	0.433013	11
c696	c696.a1	c696.a1.a1	sp|P54775|PRS6B_MOUSE 26S protease regulatory subunit 6B OS=Mus musculus GN=Psmc4 PE=1 SV=2	-21.9774	15	47.3	418	16	0.238095	0.730196	7
c697	c697.a1	c697.a1.a1	sp|Q3U7U4|CA162_MOUSE Transmembrane protein C1orf162 homolog OS=Mus musculus PE=1 SV=1	-9.55068	24	14.3	132	15	0.285714	0.930698	13
c698	c698.a1	c698.a1.a1	sp|O55234|PSB5_MOUSE Proteasome subunit beta type-5 OS=Mus musculus GN=Psmb5 PE=1 SV=3	-26.3583	23	28.4	264	15	0.307692	1.03092	12
c699	c699.a1	c699.a1.a1	sp|P62196|PRS8_MOUSE 26S protease regulatory subunit 8 OS=Mus musculus GN=Psmc5 PE=1 SV=1	-22.2129	18	45.5	406	15	0.363636	1.31013	10
c700	c700.a1	c700.a1.a1	sp|Q9WTX5|SKP1_MOUSE S-phase kinase-associated protein 1 OS=Mus musculus GN=Skp1 PE=1 SV=3	-13.9374	37	18.6	163	15	0.5	2.16228	11
c701	c701.a1	c701.a1.a1	sp|Q8CBW3-2|ABI1_MOUSE Isoform 2 of Abl interactor 1 OS=Mus musculus GN=Abi1	-26.16	16	48.4	446	15	0.333333	1.15443	9
c701	c701.a1	c701.a1.a2	sp|Q8CBW3-3|ABI1_MOUSE Isoform 3 of Abl interactor 1 OS=Mus musculus GN=Abi1	-26.16	15	51.5	476	15	0.333333	1.15443	9
c701	c701.a1	c701.a1.a3	sp|Q8CBW3-4|ABI1_MOUSE Isoform 4 of Abl interactor 1 OS=Mus musculus GN=Abi1	-26.16	15	51.5	475	15	0.333333	1.15443	9
c701	c701.a1	c701.a1.a4	sp|Q8CBW3-5|ABI1_MOUSE Isoform 5 of Abl interactor 1 OS=Mus musculus GN=Abi1	-26.16	19	42.4	388	15	0.352941	1.25393	9
c701	c701.a1	c701.a1.a5	sp|Q8CBW3|ABI1_MOUSE Abl interactor 1 OS=Mus musculus GN=Abi1 PE=1 SV=3	-26.16	15	52.2	481	15	0.333333	1.15443	9
c702	c702.a1	c702.a1.a1	sp|O08579|EMD_MOUSE Emerin OS=Mus musculus GN=Emd PE=1 SV=1	-36.4031	25	29.3	259	15	0.5	2.16228	9
c703	c703.a1	c703.a1.a1	sp|O35744|CHIL3_MOUSE Chitinase-like protein 3 OS=Mus musculus GN=Chil3 PE=1 SV=2	-62.0719	44	44.3	398	15	1	9	3
c704	c704.a1	c704.a1.a1	sp|Q8BG73|SH3L2_MOUSE SH3 domain-binding glutamic acid-rich-like protein 2 OS=Mus musculus GN=Sh3bgrl2 PE=1 SV=1	-19.0521	50	12.2	107	15	0.8	5.30957	11
c705	c705.a1	c705.a1.a1	sp|Q60668-2|HNRPD_MOUSE Isoform 2 of Heterogeneous nuclear ribonucleoprotein D0 OS=Mus musculus GN=Hnrnpd	-20.0264	13	36.3	336	10	0.444444	1.78256	7
c705	c705.a1	c705.a1.a2	sp|Q60668-3|HNRPD_MOUSE Isoform 3 of Heterogeneous nuclear ribonucleoprotein D0 OS=Mus musculus GN=Hnrnpd	-20.0264	15	32.7	306	10	0.333333	1.15443	7
c705	c705.a1	c705.a1.a3	sp|Q60668-4|HNRPD_MOUSE Isoform 4 of Heterogeneous nuclear ribonucleoprotein D0 OS=Mus musculus GN=Hnrnpd	-20.0264	16	30.7	287	10	0.4	1.51189	7
c705	c705.a1	c705.a1.a4	sp|Q60668|HNRPD_MOUSE Heterogeneous nuclear ribonucleoprotein D0 OS=Mus musculus GN=Hnrnpd PE=1 SV=2	-20.0264	13	38.2	355	10	0.363636	1.31013	7
c705	c705.a2	c705.a2.a1	sp|Q99020|ROAA_MOUSE Heterogeneous nuclear ribonucleoprotein A/B OS=Mus musculus GN=Hnrnpab PE=1 SV=1	-23.0506	19	30.7	285	7	0.4	1.51189	3
c706	c706.a1	c706.a1.a1	sp|Q91YS8|KCC1A_MOUSE Calcium/calmodulin-dependent protein kinase type 1 OS=Mus musculus GN=Camk1 PE=1 SV=1	-25.0713	14	41.5	374	15	0.285714	0.930698	9
c707	c707.a1	c707.a1.a1	sp|Q9WUL7|ARL3_MOUSE ADP-ribosylation factor-like protein 3 OS=Mus musculus GN=Arl3 PE=1 SV=1	-15.1778	24	20.4	182	15	0.3	0.995262	14
c708	c708.a1	c708.a1.a1	sp|P62702|RS4X_MOUSE 40S ribosomal protein S4, X isoform OS=Mus musculus GN=Rps4x PE=1 SV=2	-15.3613	13	29.5	263	15	0.214286	0.637894	9
c709	c709.a1	c709.a1.a1	sp|Q9WUA2|SYFB_MOUSE Phenylalanine--tRNA ligase beta subunit OS=Mus musculus GN=Farsb PE=1 SV=2	-9.89825	3	65.6	589	15	0.0740741	0.185971	14
c710	c710.a1	c710.a1.a1	sp|Q8BMF4|ODP2_MOUSE Dihydrolipoyllysine-residue acetyltransferase component of pyruvate dehydrogenase complex, mitochondrial OS=Mus musculus GN=Dlat PE=1 SV=2	-21.7342	13	67.8	642	15	0.166667	0.467799	12
c711	c711.a1	c711.a1.a1	sp|Q9DCS9|NDUBA_MOUSE NADH dehydrogenase [ubiquinone] 1 beta subcomplex subunit 10 OS=Mus musculus GN=Ndufb10 PE=1 SV=3	-14.3378	24	20.9	176	15	0.272727	0.873817	13
c712	c712.a1	c712.a1.a1	sp|Q8BG05-2|ROA3_MOUSE Isoform 2 of Heterogeneous nuclear ribonucleoprotein A3 OS=Mus musculus GN=Hnrnpa3	-21.9756	15	37	357	14	0.307692	1.03092	11
c712	c712.a1	c712.a1.a2	sp|Q8BG05|ROA3_MOUSE Heterogeneous nuclear ribonucleoprotein A3 OS=Mus musculus GN=Hnrnpa3 PE=1 SV=1	-21.9756	15	39.5	379	14	0.285714	0.930698	11
c713	c713.a1	c713.a1.a1	sp|P26883|FKB1A_MOUSE Peptidyl-prolyl cis-trans isomerase FKBP1A OS=Mus musculus GN=Fkbp1a PE=1 SV=2	-10.6853	24	11.8	108	14	0.666667	3.64159	12
c714	c714.a1	c714.a1.a1	sp|Q9JKV1|ADRM1_MOUSE Proteasomal ubiquitin receptor ADRM1 OS=Mus musculus GN=Adrm1 PE=1 SV=2	-8.60206	7	41.9	407	14	0.2	0.584893	9
c715	c715.a1	c715.a1.a1	sp|P54923|ADPRH_MOUSE [Protein ADP-ribosylarginine] hydrolase OS=Mus musculus GN=Adprh PE=1 SV=1	-24.261	29	40	362	14	0.428571	1.6827	12
c716	c716.a1	c716.a1.a1	sp|Q505F5|LRC47_MOUSE Leucine-rich repeat-containing protein 47 OS=Mus musculus GN=Lrrc47 PE=1 SV=1	-16.1836	12	63.4	581	14	0.137931	0.373824	12
c717	c717.a1	c717.a1.a1	sp|Q61029-3|LAP2B_MOUSE Isoform Epsilon of Lamina-associated polypeptide 2, isoforms beta/delta/epsilon/gamma OS=Mus musculus GN=Tmpo	-41.3214	31	45.9	412	14	0.4	1.51189	4
c717	c717.a1	c717.a1.a2	sp|Q61029|LAP2B_MOUSE Lamina-associated polypeptide 2, isoforms beta/delta/epsilon/gamma OS=Mus musculus GN=Tmpo PE=1 SV=4	-41.3214	28	50.2	452	14	0.4	1.51189	4
c718	c718.a1	c718.a1.a1	sp|Q8VE47|UBA5_MOUSE Ubiquitin-like modifier-activating enzyme 5 OS=Mus musculus GN=Uba5 PE=1 SV=2	-15.9831	18	44.7	403	14	0.285714	0.930698	10
c719	c719.a1	c719.a1.a1	sp|Q9WTM5|RUVB2_MOUSE RuvB-like 2 OS=Mus musculus GN=Ruvbl2 PE=1 SV=3	-22.5155	14	51	463	14	0.208333	0.615598	11
c720	c720.a1	c720.a1.a1	sp|Q9Z2L7-2|CRLF3_MOUSE Isoform 2 of Cytokine receptor-like factor 3 OS=Mus musculus GN=Crlf3	-25.6674	24	39	344	14	0.5	2.16228	8
c720	c720.a1	c720.a1.a2	sp|Q9Z2L7|CRLF3_MOUSE Cytokine receptor-like factor 3 OS=Mus musculus GN=Crlf3 PE=1 SV=1	-25.6674	18	49.4	442	14	0.384615	1.42446	8
c721	c721.a1	c721.a1.a1	sp|Q8C522|ENDD1_MOUSE Endonuclease domain-containing 1 protein OS=Mus musculus GN=Endod1 PE=1 SV=2	-26.9941	19	55.1	501	14	0.352941	1.25393	8
c722	c722.a1	c722.a1.a1	sp|P54822|PUR8_MOUSE Adenylosuccinate lyase OS=Mus musculus GN=Adsl PE=1 SV=2	-13.7405	9	54.7	484	14	0.190476	0.550516	10
c723	c723.a1	c723.a1.a1	sp|Q7TMR0|PCP_MOUSE Lysosomal Pro-X carboxypeptidase OS=Mus musculus GN=Prcp PE=1 SV=2	-20.2278	19	54.9	491	14	0.4375	1.73842	8
c724	c724.a1	c724.a1.a1	sp|P29416|HEXA_MOUSE Beta-hexosaminidase subunit alpha OS=Mus musculus GN=Hexa PE=1 SV=2	-21.6408	13	60.5	528	14	0.263158	0.832981	9
c725	c725.a1	c725.a1.a1	sp|Q9ERL9|GCYA3_MOUSE Guanylate cyclase soluble subunit alpha-3 OS=Mus musculus GN=Gucy1a3 PE=1 SV=2	-17.9106	6	77.4	691	14	0.111111	0.29155	9
c726	c726.a1	c726.a1.a1	sp|O88668|CREG1_MOUSE Protein CREG1 OS=Mus musculus GN=Creg1 PE=1 SV=1	-11.5694	13	24.4	220	14	0.375	1.37137	5
c727	c727.a1	c727.a1.a1	sp|Q8CAA7|PGM2L_MOUSE Glucose 1,6-bisphosphate synthase OS=Mus musculus GN=Pgm2l1 PE=1 SV=1	-11.8826	6	70.1	621	14	0.107143	0.279802	9
c728	c728.a1	c728.a1.a1	sp|O88545|CSN6_MOUSE COP9 signalosome complex subunit 6 OS=Mus musculus GN=Cops6 PE=1 SV=1	-9.95638	11	35.8	324	14	0.25	0.778279	11
c729	c729.a1	c729.a1.a1	sp|Q8C0C7|SYFA_MOUSE Phenylalanine--tRNA ligase alpha subunit OS=Mus musculus GN=Farsa PE=1 SV=1	-19.4718	6	57.5	508	14	0.15	0.412538	9
c730	c730.a1	c730.a1.a1	sp|Q5SXY1-2|CYTSB_MOUSE Isoform 2 of Cytospin-B OS=Mus musculus GN=Specc1	-24.2868	9	87.6	790	13	0.128205	0.343399	8
c730	c730.a1	c730.a1.a2	sp|Q5SXY1|CYTSB_MOUSE Cytospin-B OS=Mus musculus GN=Specc1 PE=1 SV=2	-24.2868	7	117.9	1067	13	0.1	0.258925	8
c731	c731.a1	c731.a1.a1	sp|Q9D172|ES1_MOUSE ES1 protein homolog, mitochondrial OS=Mus musculus GN=D10Jhu81e PE=1 SV=1	-15.0373	22	28	266	13	0.454545	1.84804	8
c732	c732.a1	c732.a1.a1	sp|P63073|IF4E_MOUSE Eukaryotic translation initiation factor 4E OS=Mus musculus GN=Eif4e PE=1 SV=1	-11.3811	26	25	217	13	0.333333	1.15443	12
c733	c733.a1	c733.a1.a1	sp|Q07813|BAX_MOUSE Apoptosis regulator BAX OS=Mus musculus GN=Bax PE=1 SV=1	-16.8492	29	21.3	192	13	0.5	2.16228	10
c734	c734.a1	c734.a1.a1	sp|Q3UMT1|PP12C_MOUSE Protein phosphatase 1 regulatory subunit 12C OS=Mus musculus GN=Ppp1r12c PE=1 SV=1	-22.7409	13	84.5	782	13	0.176471	0.501311	9
c735	c735.a1	c735.a1.a1	sp|Q8K4L3-3|SVIL_MOUSE Isoform 2 of Supervillin OS=Mus musculus GN=Svil	-18.7965	4	198.2	1766	13	0.0704225	0.176041	10
c735	c735.a1	c735.a1.a2	sp|Q8K4L3|SVIL_MOUSE Supervillin OS=Mus musculus GN=Svil PE=1 SV=1	-18.7965	3	242.8	2170	13	0.0543478	0.133308	10
c736	c736.a1	c736.a1.a1	sp|P23506-2|PIMT_MOUSE Isoform 2 of Protein-L-isoaspartate(D-aspartate) O-methyltransferase OS=Mus musculus GN=Pcmt1	-27.0962	22	24.6	228	13	0.75	4.62341	10
c736	c736.a1	c736.a1.a2	sp|P23506|PIMT_MOUSE Protein-L-isoaspartate(D-aspartate) O-methyltransferase OS=Mus musculus GN=Pcmt1 PE=1 SV=3	-27.0962	22	24.5	227	13	0.75	4.62341	10
c737	c737.a1	c737.a1.a1	sp|P31240|PDGFB_MOUSE Platelet-derived growth factor subunit B OS=Mus musculus GN=Pdgfb PE=2 SV=1	-13.1035	15	27.3	241	13	0.3	0.995262	8
c738	c738.a1	c738.a1.a1	sp|Q8R1S4-2|MTSS1_MOUSE Isoform 2 of Metastasis suppressor protein 1 OS=Mus musculus GN=Mtss1	-18.4202	10	78.7	723	13	0.178571	0.508591	7
c738	c738.a1	c738.a1.a2	sp|Q8R1S4|MTSS1_MOUSE Metastasis suppressor protein 1 OS=Mus musculus GN=Mtss1 PE=1 SV=1	-18.4202	10	82.2	759	13	0.178571	0.508591	7
c739	c739.a1	c739.a1.a1	sp|Q9QUG9|GRP2_MOUSE RAS guanyl-releasing protein 2 OS=Mus musculus GN=Rasgrp2 PE=1 SV=2	-25.4416	17	69.3	608	13	0.233333	0.711328	8
c740	c740.a1	c740.a1.a1	sp|Q9Z2I8-2|SUCB2_MOUSE Isoform 2 of Succinate--CoA ligase [GDP-forming] subunit beta, mitochondrial OS=Mus musculus GN=Suclg2	-20.9414	18	41.2	384	13	0.294118	0.968419	10
c740	c740.a1	c740.a1.a2	sp|Q9Z2I8|SUCB2_MOUSE Succinate--CoA ligase [GDP-forming] subunit beta, mitochondrial OS=Mus musculus GN=Suclg2 PE=1 SV=3	-20.9414	16	46.7	433	13	0.238095	0.730196	10
c741	c741.a1	c741.a1.a1	sp|Q8BK64|AHSA1_MOUSE Activator of 90 kDa heat shock protein ATPase homolog 1 OS=Mus musculus GN=Ahsa1 PE=1 SV=2	-18.8007	19	38	338	13	0.294118	0.968419	9
c742	c742.a1	c742.a1.a1	sp|Q00724|RET4_MOUSE Retinol-binding protein 4 OS=Mus musculus GN=Rbp4 PE=1 SV=2	-23.2933	28	23.1	201	13	0.625	3.21697	8
c743	c743.a1	c743.a1.a1	sp|Q99LD4|CSN1_MOUSE COP9 signalosome complex subunit 1 OS=Mus musculus GN=Gps1 PE=1 SV=1	-14.234	11	53.3	471	13	0.266667	0.84785	11
c744	c744.a1	c744.a1.a1	sp|Q8K4Z3|NNRE_MOUSE NAD(P)H-hydrate epimerase OS=Mus musculus GN=Naxe PE=1 SV=1	-23.7092	27	30.9	282	13	0.384615	1.42446	9
c745	c745.a1	c745.a1.a1	sp|P34884|MIF_MOUSE Macrophage migration inhibitory factor OS=Mus musculus GN=Mif PE=1 SV=2	-20.0273	35	12.4	115	13	0.8	5.30957	8
c746	c746.a1	c746.a1.a1	sp|P70195|PSB7_MOUSE Proteasome subunit beta type-7 OS=Mus musculus GN=Psmb7 PE=1 SV=1	-13.2502	16	29.8	277	13	0.444444	1.78256	9
c747	c747.a1	c747.a1.a1	sp|P62855|RS26_MOUSE 40S ribosomal protein S26 OS=Mus musculus GN=Rps26 PE=1 SV=3	-16.9385	34	12.9	115	13	1.33333	20.5443	6
c748	c748.a1	c748.a1.a1	sp|P68181-2|KAPCB_MOUSE Isoform 2 of cAMP-dependent protein kinase catalytic subunit beta OS=Mus musculus GN=Prkacb	-7.4437	5	39.3	338	8	0.153846	0.425103	5
c748	c748.a1	c748.a1.a2	sp|P68181-3|KAPCB_MOUSE Isoform 3 of cAMP-dependent protein kinase catalytic subunit beta OS=Mus musculus GN=Prkacb	-7.4437	5	39.4	339	8	0.153846	0.425103	5
c748	c748.a1	c748.a1.a3	sp|P68181-4|KAPCB_MOUSE Isoform 4 of cAMP-dependent protein kinase catalytic subunit beta OS=Mus musculus GN=Prkacb	-7.4437	4	45.9	398	8	0.125	0.333521	5
c748	c748.a1	c748.a1.a4	sp|P68181|KAPCB_MOUSE cAMP-dependent protein kinase catalytic subunit beta OS=Mus musculus GN=Prkacb PE=1 SV=2	-7.4437	5	40.6	351	8	0.142857	0.389495	5
c748	c748.a2	c748.a2.a1	sp|P05132-2|KAPCA_MOUSE Isoform 2 of cAMP-dependent protein kinase catalytic subunit alpha OS=Mus musculus GN=Prkaca	-7.60206	5	39.7	343	7	0.142857	0.389495	5
c748	c748.a2	c748.a2.a2	sp|P05132|KAPCA_MOUSE cAMP-dependent protein kinase catalytic subunit alpha OS=Mus musculus GN=Prkaca PE=1 SV=3	-7.60206	5	40.5	351	7	0.142857	0.389495	5
c749	c749.a1	c749.a1.a1	sp|O54865|GCYB1_MOUSE Guanylate cyclase soluble subunit beta-1 OS=Mus musculus GN=Gucy1b3 PE=1 SV=1	-21.4803	9	70.4	620	13	0.142857	0.389495	9
c750	c750.a1	c750.a1.a1	sp|Q9CRA5|GOLP3_MOUSE Golgi phosphoprotein 3 OS=Mus musculus GN=Golph3 PE=1 SV=1	-14.9069	14	33.6	298	13	0.214286	0.637894	11
c751	c751.a1	c751.a1.a1	sp|P46664|PURA2_MOUSE Adenylosuccinate synthetase isozyme 2 OS=Mus musculus GN=Adss PE=1 SV=2	-21.4895	10	49.9	456	13	0.157895	0.43845	11
c752	c752.a1	c752.a1.a1	sp|Q6ZQ38|CAND1_MOUSE Cullin-associated NEDD8-dissociated protein 1 OS=Mus musculus GN=Cand1 PE=1 SV=2	-27.2011	8	136.1	1230	13	0.134615	0.363375	7
c753	c753.a1	c753.a1.a1	sp|Q6PEB6|PHOCN_MOUSE MOB-like protein phocein OS=Mus musculus GN=Mob4 PE=1 SV=1	-17.2278	21	25.9	225	13	0.333333	1.15443	9
c754	c754.a1	c754.a1.a1	sp|P62960|YBOX1_MOUSE Nuclease-sensitive element-binding protein 1 OS=Mus musculus GN=Ybx1 PE=1 SV=3	-31.1057	48	35.6	322	12	0.583333	2.83119	4
c755	c755.a1	c755.a1.a1	sp|Q64514-2|TPP2_MOUSE Isoform Short of Tripeptidyl-peptidase 2 OS=Mus musculus GN=Tpp2	-20.0731	7	138.2	1249	12	0.127273	0.340518	7
c755	c755.a1	c755.a1.a2	sp|Q64514|TPP2_MOUSE Tripeptidyl-peptidase 2 OS=Mus musculus GN=Tpp2 PE=1 SV=3	-20.0731	7	139.7	1262	12	0.127273	0.340518	7
c756	c756.a1	c756.a1.a1	sp|Q9Z0N1|IF2G_MOUSE Eukaryotic translation initiation factor 2 subunit 3, X-linked OS=Mus musculus GN=Eif2s3x PE=1 SV=2	-18.4091	14	50.9	472	11	0.3125	1.05353	6
c756	c756.a2	c756.a2.a1	sp|Q9Z0N2|IF2H_MOUSE Eukaryotic translation initiation factor 2 subunit 3, Y-linked OS=Mus musculus GN=Eif2s3y PE=1 SV=2	-12.621	11	51	472	6	0.266667	0.84785	4
c757	c757.a1	c757.a1.a1	sp|Q99PL5|RRBP1_MOUSE Ribosome-binding protein 1 OS=Mus musculus GN=Rrbp1 PE=1 SV=2	-23.3233	4	172.6	1605	12	0.047619	0.115884	6
c758	c758.a1	c758.a1.a1	sp|Q6RFH4-2|GCSAM_MOUSE Isoform 2 of Germinal center-associated signaling and motility protein OS=Mus musculus GN=Gcsam	-20.5482	40	18.2	159	12	0.571429	2.72759	7
c758	c758.a1	c758.a1.a2	sp|Q6RFH4|GCSAM_MOUSE Germinal center-associated signaling and motility protein OS=Mus musculus GN=Gcsam PE=1 SV=1	-20.5482	35	20.9	181	12	0.5	2.16228	7
c759	c759.a1	c759.a1.a1	sp|Q8K1I7|WIPF1_MOUSE WAS/WASL-interacting protein family member 1 OS=Mus musculus GN=Wipf1 PE=1 SV=1	-21.4112	20	50	493	12	0.28	0.905461	7
c760	c760.a1	c760.a1.a1	sp|Q99L13|3HIDH_MOUSE 3-hydroxyisobutyrate dehydrogenase, mitochondrial OS=Mus musculus GN=Hibadh PE=1 SV=1	-26.1453	24	35.3	335	12	0.357143	1.27585	8
c761	c761.a1	c761.a1.a1	sp|P26516|PSMD7_MOUSE 26S proteasome non-ATPase regulatory subunit 7 OS=Mus musculus GN=Psmd7 PE=1 SV=2	-17.7285	15	36.4	321	12	0.454545	1.84804	6
c762	c762.a1	c762.a1.a1	sp|P10518|HEM2_MOUSE Delta-aminolevulinic acid dehydratase OS=Mus musculus GN=Alad PE=1 SV=1	-16.6296	17	35.9	330	12	0.333333	1.15443	7
c763	c763.a1	c763.a1.a1	sp|P62242|RS8_MOUSE 40S ribosomal protein S8 OS=Mus musculus GN=Rps8 PE=1 SV=2	-23.2908	24	24.1	208	12	0.444444	1.78256	4
c764	c764.a1	c764.a1.a1	sp|Q8K209|AGRG1_MOUSE Adhesion G-protein coupled receptor G1 OS=Mus musculus GN=Adgrg1 PE=1 SV=1	-19.4762	7	77.1	687	12	0.2	0.584893	8
c765	c765.a1	c765.a1.a1	sp|P13634|CAH1_MOUSE Carbonic anhydrase 1 OS=Mus musculus GN=Ca1 PE=1 SV=4	-23.2506	37	28.2	261	12	0.5	2.16228	7
c766	c766.a1	c766.a1.a1	sp|O09131|GSTO1_MOUSE Glutathione S-transferase omega-1 OS=Mus musculus GN=Gsto1 PE=1 SV=2	-15.5184	19	27.4	240	12	0.285714	0.930698	10
c767	c767.a1	c767.a1.a1	sp|O35593|PSDE_MOUSE 26S proteasome non-ATPase regulatory subunit 14 OS=Mus musculus GN=Psmd14 PE=1 SV=2	-25.4155	31	34.5	310	12	0.5	2.16228	8
c768	c768.a1	c768.a1.a1	sp|Q8BJY1|PSMD5_MOUSE 26S proteasome non-ATPase regulatory subunit 5 OS=Mus musculus GN=Psmd5 PE=1 SV=4	-13.3266	11	55.8	504	12	0.227273	0.687612	9
c769	c769.a1	c769.a1.a1	sp|Q9CZW5|TOM70_MOUSE Mitochondrial import receptor subunit TOM70 OS=Mus musculus GN=Tomm70 PE=1 SV=2	-27.8108	12	67.4	611	12	0.227273	0.687612	8
c770	c770.a1	c770.a1.a1	sp|Q9CQA3|SDHB_MOUSE Succinate dehydrogenase [ubiquinone] iron-sulfur subunit, mitochondrial OS=Mus musculus GN=Sdhb PE=1 SV=1	-21.3853	24	31.7	282	12	0.4375	1.73842	9
c771	c771.a1	c771.a1.a1	sp|Q6DIA2|EX3L4_MOUSE Exocyst complex component 3-like protein 4 OS=Mus musculus GN=Exoc3l4 PE=1 SV=2	-15.0909	7	80.9	721	12	0.129032	0.34596	9
c772	c772.a1	c772.a1.a1	sp|P59108|CPNE2_MOUSE Copine-2 OS=Mus musculus GN=Cpne2 PE=1 SV=1	-8.24512	6	60.9	548	12	0.130435	0.350314	10
c773	c773.a1	c773.a1.a1	sp|P63323|RS12_MOUSE 40S ribosomal protein S12 OS=Mus musculus GN=Rps12 PE=1 SV=2	-32.2143	42	14.4	132	12	0.857143	6.19686	7
c774	c774.a1	c774.a1.a1	sp|P68037|UB2L3_MOUSE Ubiquitin-conjugating enzyme E2 L3 OS=Mus musculus GN=Ube2l3 PE=1 SV=1	-14.9018	30	17.8	154	12	0.666667	3.64159	8
c775	c775.a1	c775.a1.a1	sp|P23116|EIF3A_MOUSE Eukaryotic translation initiation factor 3 subunit A OS=Mus musculus GN=Eif3a PE=1 SV=5	-15.4481	3	161.7	1344	12	0.0727273	0.182299	7
c776	c776.a1	c776.a1.a1	sp|Q62422|OSTF1_MOUSE Osteoclast-stimulating factor 1 OS=Mus musculus GN=Ostf1 PE=1 SV=2	-25.1195	26	23.7	215	12	0.444444	1.78256	10
c777	c777.a1	c777.a1.a1	sp|Q3TXS7|PSMD1_MOUSE 26S proteasome non-ATPase regulatory subunit 1 OS=Mus musculus GN=Psmd1 PE=1 SV=1	-15.5972	6	105.5	953	12	0.1	0.258925	10
c778	c778.a1	c778.a1.a1	sp|Q99LC3|NDUAA_MOUSE NADH dehydrogenase [ubiquinone] 1 alpha subcomplex subunit 10, mitochondrial OS=Mus musculus GN=Ndufa10 PE=1 SV=1	-19.7598	19	40.5	355	12	0.235294	0.719072	7
c779	c779.a1	c779.a1.a1	sp|Q9DCM2|GSTK1_MOUSE Glutathione S-transferase kappa 1 OS=Mus musculus GN=Gstk1 PE=1 SV=3	-11.5834	11	25.6	226	12	0.153846	0.425103	9
c780	c780.a1	c780.a1.a1	sp|Q8BYY9|SPA3B_MOUSE Serine protease inhibitor A3B OS=Mus musculus GN=Serpina3b PE=2 SV=1	-21.948	14	47.3	420	12	0.222222	0.668101	8
c781	c781.a1	c781.a1.a1	sp|P30416|FKBP4_MOUSE Peptidyl-prolyl cis-trans isomerase FKBP4 OS=Mus musculus GN=Fkbp4 PE=1 SV=5	-18.1266	15	51.4	458	11	0.178571	0.508591	10
c782	c782.a1	c782.a1.a1	sp|P62270|RS18_MOUSE 40S ribosomal protein S18 OS=Mus musculus GN=Rps18 PE=1 SV=3	-20.9295	24	17.6	152	11	0.625	3.21697	4
c783	c783.a1	c783.a1.a1	sp|Q9D855|QCR7_MOUSE Cytochrome b-c1 complex subunit 7 OS=Mus musculus GN=Uqcrb PE=1 SV=3	-8.44806	21	13.4	111	11	0.5	2.16228	9
c784	c784.a1	c784.a1.a1	sp|Q3URD3-2|SLMAP_MOUSE Isoform 2 of Sarcolemmal membrane-associated protein OS=Mus musculus GN=Slmap	-14.6323	7	94.2	821	11	0.102041	0.264855	9
c784	c784.a1	c784.a1.a2	sp|Q3URD3|SLMAP_MOUSE Sarcolemmal membrane-associated protein OS=Mus musculus GN=Slmap PE=1 SV=2	-14.6323	7	96.8	845	11	0.1	0.258925	9
c785	c785.a1	c785.a1.a1	sp|Q921C5-2|BICD2_MOUSE Isoform 2 of Protein bicaudal D homolog 2 OS=Mus musculus GN=Bicd2	-17.1226	7	96.5	851	11	0.116279	0.30701	7
c785	c785.a1	c785.a1.a2	sp|Q921C5|BICD2_MOUSE Protein bicaudal D homolog 2 OS=Mus musculus GN=Bicd2 PE=1 SV=1	-17.1226	8	93.2	820	11	0.121951	0.324193	7
c786	c786.a1	c786.a1.a1	sp|P09528|FRIH_MOUSE Ferritin heavy chain OS=Mus musculus GN=Fth1 PE=1 SV=2	-11.3063	18	21	182	11	0.3	0.995262	8
c787	c787.a1	c787.a1.a1	sp|Q9CYL5|GAPR1_MOUSE Golgi-associated plant pathogenesis-related protein 1 OS=Mus musculus GN=Glipr2 PE=1 SV=3	-13.2596	16	17	154	11	0.25	0.778279	9
c788	c788.a1	c788.a1.a1	sp|Q9CZY3|UB2V1_MOUSE Ubiquitin-conjugating enzyme E2 variant 1 OS=Mus musculus GN=Ube2v1 PE=1 SV=1	-23.8484	41	16.3	147	11	0.777778	4.99484	9
c789	c789.a1	c789.a1.a1	sp|Q9WUM5|SUCA_MOUSE Succinate--CoA ligase [ADP/GDP-forming] subunit alpha, mitochondrial OS=Mus musculus GN=Suclg1 PE=1 SV=4	-18.2502	12	36	346	11	0.25	0.778279	8
c790	c790.a1	c790.a1.a1	sp|Q61247|A2AP_MOUSE Alpha-2-antiplasmin OS=Mus musculus GN=Serpinf2 PE=1 SV=1	-24.937	13	54.8	491	11	0.461538	1.89427	6
c791	c791.a1	c791.a1.a1	sp|P84228|H32_MOUSE Histone H3.2 OS=Mus musculus GN=Hist1h3b PE=1 SV=2	-16.1273	43	15.3	136	11	2.5	315.228	6
c792	c792.a1	c792.a1.a1	sp|P28063|PSB8_MOUSE Proteasome subunit beta type-8 OS=Mus musculus GN=Psmb8 PE=1 SV=2	-9.20532	12	30.2	276	11	0.2	0.584893	7
c793	c793.a1	c793.a1.a1	sp|Q9D0E1-2|HNRPM_MOUSE Isoform 2 of Heterogeneous nuclear ribonucleoprotein M OS=Mus musculus GN=Hnrnpm	-19.1582	7	73.6	690	11	0.15625	0.433013	6
c793	c793.a1	c793.a1.a2	sp|Q9D0E1|HNRPM_MOUSE Heterogeneous nuclear ribonucleoprotein M OS=Mus musculus GN=Hnrnpm PE=1 SV=3	-19.1582	7	77.5	729	11	0.15625	0.433013	6
c794	c794.a1	c794.a1.a1	sp|Q6NVE8|WDR44_MOUSE WD repeat-containing protein 44 OS=Mus musculus GN=Wdr44 PE=1 SV=1	-18.583	14	101.4	915	11	0.139535	0.378907	7
c795	c795.a1	c795.a1.a1	sp|Q9JHR7|IDE_MOUSE Insulin-degrading enzyme OS=Mus musculus GN=Ide PE=1 SV=1	-20.227	6	117.6	1019	11	0.148936	0.409082	9
c796	c796.a1	c796.a1.a1	sp|Q61187|TS101_MOUSE Tumor susceptibility gene 101 protein OS=Mus musculus GN=Tsg101 PE=1 SV=2	-8.29397	8	44	391	11	0.142857	0.389495	10
c797	c797.a1	c797.a1.a1	sp|P11247|PERM_MOUSE Myeloperoxidase OS=Mus musculus GN=Mpo PE=1 SV=2	-49.3946	21	81	718	11	0.294118	0.968419	3
c798	c798.a1	c798.a1.a1	sp|Q8K3K8|OPTN_MOUSE Optineurin OS=Mus musculus GN=Optn PE=1 SV=1	-21.4635	8	66.9	584	11	0.114286	0.301025	8
c799	c799.a1	c799.a1.a1	sp|Q9JIY5|HTRA2_MOUSE Serine protease HTRA2, mitochondrial OS=Mus musculus GN=Htra2 PE=1 SV=2	-23.7341	15	49.2	458	11	0.210526	0.623777	10
c800	c800.a1	c800.a1.a1	sp|Q11011|PSA_MOUSE Puromycin-sensitive aminopeptidase OS=Mus musculus GN=Npepps PE=1 SV=2	-16.5743	6	103.1	920	11	0.113636	0.299081	8
c801	c801.a1	c801.a1.a1	sp|Q9Z1Z2|STRAP_MOUSE Serine-threonine kinase receptor-associated protein OS=Mus musculus GN=Strap PE=1 SV=2	-19.6362	18	38.3	350	11	0.210526	0.623777	7
c802	c802.a1	c802.a1.a1	sp|Q9QXT1|DAPP1_MOUSE Dual adapter for phosphotyrosine and 3-phosphotyrosine and 3-phosphoinositide OS=Mus musculus GN=Dapp1 PE=1 SV=1	-17.7746	18	32.1	280	11	0.277778	0.895736	7
c803	c803.a1	c803.a1.a1	sp|Q9R062|GLYG_MOUSE Glycogenin-1 OS=Mus musculus GN=Gyg1 PE=1 SV=3	-10.2676	8	37.3	333	11	0.2	0.584893	10
c804	c804.a1	c804.a1.a1	sp|Q9JM14|NT5C_MOUSE 5'(3')-deoxyribonucleotidase, cytosolic type OS=Mus musculus GN=Nt5c PE=1 SV=1	-20.3453	38	23	200	11	0.625	3.21697	7
c805	c805.a1	c805.a1.a1	sp|P62869|ELOB_MOUSE Transcription elongation factor B polypeptide 2 OS=Mus musculus GN=Tceb2 PE=1 SV=1	-16.223	52	13.1	118	11	0.333333	1.15443	8
c806	c806.a1	c806.a1.a1	sp|Q8BP47|SYNC_MOUSE Asparagine--tRNA ligase, cytoplasmic OS=Mus musculus GN=Nars PE=1 SV=2	-17.182	10	64.1	559	11	0.173913	0.492496	9
c807	c807.a1	c807.a1.a1	sp|Q9D8B3|CHM4B_MOUSE Charged multivesicular body protein 4b OS=Mus musculus GN=Chmp4b PE=1 SV=2	-15.5114	13	24.8	224	11	0.222222	0.668101	9
c808	c808.a1	c808.a1.a1	sp|P54728|RD23B_MOUSE UV excision repair protein RAD23 homolog B OS=Mus musculus GN=Rad23b PE=1 SV=2	-17.6361	11	43.4	416	11	0.384615	1.42446	6
c809	c809.a1	c809.a1.a1	sp|Q99KB8-2|GLO2_MOUSE Isoform 2 of Hydroxyacylglutathione hydrolase, mitochondrial OS=Mus musculus GN=Hagh	-7.51145	10	28.8	260	10	0.222222	0.668101	9
c809	c809.a1	c809.a1.a2	sp|Q99KB8|GLO2_MOUSE Hydroxyacylglutathione hydrolase, mitochondrial OS=Mus musculus GN=Hagh PE=1 SV=2	-7.51145	9	34	309	10	0.166667	0.467799	9
c810	c810.a1	c810.a1.a1	sp|Q91XV3|BASP1_MOUSE Brain acid soluble protein 1 OS=Mus musculus GN=Basp1 PE=1 SV=3	-27.121	32	22	226	10	0.5	2.16228	7
c811	c811.a1	c811.a1.a1	sp|P01837|IGKC_MOUSE Ig kappa chain C region OS=Mus musculus PE=1 SV=1	-12.815	55	11.7	106	10	1	9	6
c812	c812.a1	c812.a1.a1	sp|Q9CQW9|IFM3_MOUSE Interferon-induced transmembrane protein 3 OS=Mus musculus GN=Ifitm3 PE=1 SV=1	-21.2616	42	14.9	137	10	1	9	5
c813	c813.a1	c813.a1.a1	sp|Q8VIK5-2|PEAR1_MOUSE Isoform 2 of Platelet endothelial aggregation receptor 1 OS=Mus musculus GN=Pear1	-12.3335	3	107.2	1004	10	0.0740741	0.185971	7
c813	c813.a1	c813.a1.a2	sp|Q8VIK5-3|PEAR1_MOUSE Isoform 3 of Platelet endothelial aggregation receptor 1 OS=Mus musculus GN=Pear1	-12.3335	4	78.8	747	10	0.111111	0.29155	7
c813	c813.a1	c813.a1.a3	sp|Q8VIK5-4|PEAR1_MOUSE Isoform 4 of Platelet endothelial aggregation receptor 1 OS=Mus musculus GN=Pear1	-12.3335	4	95.3	898	10	0.0909091	0.232847	7
c813	c813.a1	c813.a1.a4	sp|Q8VIK5|PEAR1_MOUSE Platelet endothelial aggregation receptor 1 OS=Mus musculus GN=Pear1 PE=1 SV=1	-12.3335	3	110.4	1034	10	0.0740741	0.185971	7
c814	c814.a1	c814.a1.a1	sp|P62908|RS3_MOUSE 40S ribosomal protein S3 OS=Mus musculus GN=Rps3 PE=1 SV=1	-17.3365	17	26.6	243	10	0.266667	0.84785	6
c815	c815.a1	c815.a1.a1	sp|O35855|BCAT2_MOUSE Branched-chain-amino-acid aminotransferase, mitochondrial OS=Mus musculus GN=Bcat2 PE=1 SV=2	-20.9673	20	44	393	10	0.375	1.37137	5
c816	c816.a1	c816.a1.a1	sp|O89023|TPP1_MOUSE Tripeptidyl-peptidase 1 OS=Mus musculus GN=Tpp1 PE=1 SV=2	-17.7231	8	61.2	562	10	0.1875	0.539927	7
c817	c817.a1	c817.a1.a1	sp|Q9WTP7|KAD3_MOUSE GTP:AMP phosphotransferase AK3, mitochondrial OS=Mus musculus GN=Ak3 PE=1 SV=3	-19.2366	19	25.3	227	10	0.214286	0.637894	7
c818	c818.a1	c818.a1.a1	sp|Q8JZR0|ACSL5_MOUSE Long-chain-fatty-acid--CoA ligase 5 OS=Mus musculus GN=Acsl5 PE=1 SV=1	-26.7487	10	76.1	683	9	0.193548	0.561523	5
c818	c818.a2	c818.a2.a1	sp|P41216|ACSL1_MOUSE Long-chain-fatty-acid--CoA ligase 1 OS=Mus musculus GN=Acsl1 PE=1 SV=2	-10.4155	5	77.8	699	3	0.0909091	0.232847	2
c819	c819.a1	c819.a1.a1	sp|P47968|RPIA_MOUSE Ribose-5-phosphate isomerase OS=Mus musculus GN=Rpia PE=1 SV=2	-15.0997	16	32.3	303	10	0.25	0.778279	7
c820	c820.a1	c820.a1.a1	sp|P60229|EIF3E_MOUSE Eukaryotic translation initiation factor 3 subunit E OS=Mus musculus GN=Eif3e PE=1 SV=1	-13.7786	9	52.1	445	10	0.153846	0.425103	6
c821	c821.a1	c821.a1.a1	sp|P97855|G3BP1_MOUSE Ras GTPase-activating protein-binding protein 1 OS=Mus musculus GN=G3bp1 PE=1 SV=1	-15.7092	10	51.7	465	10	0.176471	0.501311	7
c822	c822.a1	c822.a1.a1	sp|Q8K0Q5|RHG18_MOUSE Rho GTPase-activating protein 18 OS=Mus musculus GN=Arhgap18 PE=1 SV=1	-19.0089	10	74.8	663	10	0.114286	0.301025	7
c823	c823.a1	c823.a1.a1	sp|Q9CQ22|LTOR1_MOUSE Ragulator complex protein LAMTOR1 OS=Mus musculus GN=Lamtor1 PE=1 SV=1	-14.1789	30	17.7	161	10	0.428571	1.6827	7
c824	c824.a1	c824.a1.a1	sp|Q922D8|C1TC_MOUSE C-1-tetrahydrofolate synthase, cytoplasmic OS=Mus musculus GN=Mthfd1 PE=1 SV=4	-25.6378	9	101	935	10	0.166667	0.467799	6
c825	c825.a1	c825.a1.a1	sp|P29351-2|PTN6_MOUSE Isoform 2 of Tyrosine-protein phosphatase non-receptor type 6 OS=Mus musculus GN=Ptpn6	-19.6114	14	67.6	597	10	0.1875	0.539927	7
c825	c825.a1	c825.a1.a2	sp|P29351-3|PTN6_MOUSE Isoform 3 of Tyrosine-protein phosphatase non-receptor type 6 OS=Mus musculus GN=Ptpn6	-19.6114	15	63	556	10	0.206897	0.610262	7
c825	c825.a1	c825.a1.a3	sp|P29351|PTN6_MOUSE Tyrosine-protein phosphatase non-receptor type 6 OS=Mus musculus GN=Ptpn6 PE=1 SV=2	-19.6114	14	67.4	595	10	0.1875	0.539927	7
c826	c826.a1	c826.a1.a1	sp|Q99L04|DHRS1_MOUSE Dehydrogenase/reductase SDR family member 1 OS=Mus musculus GN=Dhrs1 PE=1 SV=1	-23.5366	13	33.9	313	10	0.235294	0.719072	8
c827	c827.a1	c827.a1.a1	sp|O35678|MGLL_MOUSE Monoglyceride lipase OS=Mus musculus GN=Mgll PE=1 SV=1	-11.0682	11	33.3	303	10	0.2	0.584893	8
c828	c828.a1	c828.a1.a1	sp|P50544|ACADV_MOUSE Very long-chain specific acyl-CoA dehydrogenase, mitochondrial OS=Mus musculus GN=Acadvl PE=1 SV=3	-20.8051	14	70.7	656	10	0.142857	0.389495	7
c829	c829.a1	c829.a1.a1	sp|Q6R891|NEB2_MOUSE Neurabin-2 OS=Mus musculus GN=Ppp1r9b PE=1 SV=1	-9.28988	3	89.4	817	9	0.0714286	0.178769	7
c830	c830.a1	c830.a1.a1	sp|Q62093|SRSF2_MOUSE Serine/arginine-rich splicing factor 2 OS=Mus musculus GN=Srsf2 PE=1 SV=4	-15.7798	16	25.4	221	9	0.5	2.16228	5
c831	c831.a1	c831.a1.a1	sp|Q9CR61|NDUB7_MOUSE NADH dehydrogenase [ubiquinone] 1 beta subcomplex subunit 7 OS=Mus musculus GN=Ndufb7 PE=1 SV=3	-16.0724	39	16.2	137	9	0.571429	2.72759	5
c832	c832.a1	c832.a1.a1	sp|Q8BIG7|CMTD1_MOUSE Catechol O-methyltransferase domain-containing protein 1 OS=Mus musculus GN=Comtd1 PE=1 SV=1	-15.1605	18	28.9	262	9	0.4	1.51189	5
c833	c833.a1	c833.a1.a1	sp|P46412|GPX3_MOUSE Glutathione peroxidase 3 OS=Mus musculus GN=Gpx3 PE=1 SV=2	-7.7158	12	25.2	226	9	0.285714	0.930698	7
c834	c834.a1	c834.a1.a1	sp|Q60902-2|EP15R_MOUSE Isoform 2 of Epidermal growth factor receptor substrate 15-like 1 OS=Mus musculus GN=Eps15l1	-13.1293	6	89.6	819	9	0.0731707	0.183507	7
c834	c834.a1	c834.a1.a2	sp|Q60902-3|EP15R_MOUSE Isoform 3 of Epidermal growth factor receptor substrate 15-like 1 OS=Mus musculus GN=Eps15l1	-13.1293	7	75.7	687	9	0.0789474	0.199354	7
c834	c834.a1	c834.a1.a3	sp|Q60902-4|EP15R_MOUSE Isoform 4 of Epidermal growth factor receptor substrate 15-like 1 OS=Mus musculus GN=Eps15l1	-13.1293	6	84.6	763	9	0.0769231	0.193777	7
c834	c834.a1	c834.a1.a4	sp|Q60902|EP15R_MOUSE Epidermal growth factor receptor substrate 15-like 1 OS=Mus musculus GN=Eps15l1 PE=1 SV=3	-13.1293	5	99.1	907	9	0.0697674	0.174269	7
c835	c835.a1	c835.a1.a1	sp|Q921F2|TADBP_MOUSE TAR DNA-binding protein 43 OS=Mus musculus GN=Tardbp PE=1 SV=1	-16.758	13	44.4	414	9	0.363636	1.31013	6
c836	c836.a1	c836.a1.a1	sp|Q8BXZ1|TMX3_MOUSE Protein disulfide-isomerase TMX3 OS=Mus musculus GN=Tmx3 PE=1 SV=2	-18.5114	14	51.7	456	9	0.176471	0.501311	5
c837	c837.a1	c837.a1.a1	sp|P62852|RS25_MOUSE 40S ribosomal protein S25 OS=Mus musculus GN=Rps25 PE=1 SV=1	-14.0324	15	13.7	125	9	0.6	2.98107	5
c838	c838.a1	c838.a1.a1	sp|Q9D3P8|PLRKT_MOUSE Plasminogen receptor (KT) OS=Mus musculus GN=Plgrkt PE=1 SV=1	-6.83209	14	17.2	147	9	0.25	0.778279	8
c839	c839.a1	c839.a1.a1	sp|Q99JY3|GIMA4_MOUSE GTPase IMAP family member 4 OS=Mus musculus GN=Gimap4 PE=1 SV=1	-20.5521	30	24.5	219	9	0.307692	1.03092	6
c840	c840.a1	c840.a1.a1	sp|Q9DCL9|PUR6_MOUSE Multifunctional protein ADE2 OS=Mus musculus GN=Paics PE=1 SV=4	-17.9033	12	46.9	425	9	0.222222	0.668101	7
c841	c841.a1	c841.a1.a1	sp|Q8VDQ8-2|SIR2_MOUSE Isoform 2 of NAD-dependent protein deacetylase sirtuin-2 OS=Mus musculus GN=Sirt2	-10.0531	7	39.4	352	9	0.105263	0.274275	7
c841	c841.a1	c841.a1.a2	sp|Q8VDQ8-3|SIR2_MOUSE Isoform 3 of NAD-dependent protein deacetylase sirtuin-2 OS=Mus musculus GN=Sirt2	-10.0531	10	26.4	235	9	0.153846	0.425103	7
c841	c841.a1	c841.a1.a3	sp|Q8VDQ8|SIR2_MOUSE NAD-dependent protein deacetylase sirtuin-2 OS=Mus musculus GN=Sirt2 PE=1 SV=2	-10.0531	6	43.1	389	9	0.1	0.258925	7
c842	c842.a1	c842.a1.a1	sp|Q9D6J6|NDUV2_MOUSE NADH dehydrogenase [ubiquinone] flavoprotein 2, mitochondrial OS=Mus musculus GN=Ndufv2 PE=1 SV=2	-11.0516	12	27.2	248	9	0.142857	0.389495	8
c843	c843.a1	c843.a1.a1	sp|Q91WQ3|SYYC_MOUSE Tyrosine--tRNA ligase, cytoplasmic OS=Mus musculus GN=Yars PE=1 SV=3	-14.0533	10	59	528	9	0.117647	0.311134	8
c844	c844.a1	c844.a1.a1	sp|Q8VBV7|CSN8_MOUSE COP9 signalosome complex subunit 8 OS=Mus musculus GN=Cops8 PE=1 SV=1	-7.18709	16	23.2	209	9	0.333333	1.15443	8
c845	c845.a1	c845.a1.a1	sp|Q6ZWQ7|SPCS3_MOUSE Signal peptidase complex subunit 3 OS=Mus musculus GN=Spcs3 PE=1 SV=1	-8.41942	12	20.2	180	9	0.4	1.51189	7
c846	c846.a1	c846.a1.a1	sp|Q8BRU6|VMAT2_MOUSE Synaptic vesicular amine transporter OS=Mus musculus GN=Slc18a2 PE=1 SV=1	-5.383	5	55.6	517	9	0.222222	0.668101	8
c847	c847.a1	c847.a1.a1	sp|Q922Q8|LRC59_MOUSE Leucine-rich repeat-containing protein 59 OS=Mus musculus GN=Lrrc59 PE=1 SV=1	-13.5738	13	34.8	307	9	0.272727	0.873817	6
c848	c848.a1	c848.a1.a1	sp|Q64310|SURF4_MOUSE Surfeit locus protein 4 OS=Mus musculus GN=Surf4 PE=1 SV=1	-12.4489	18	30.3	269	9	0.625	3.21697	7
c849	c849.a1	c849.a1.a1	sp|O88543|CSN3_MOUSE COP9 signalosome complex subunit 3 OS=Mus musculus GN=Cops3 PE=1 SV=3	-11.8459	6	47.7	423	9	0.1	0.258925	7
c850	c850.a1	c850.a1.a1	sp|Q920E5|FPPS_MOUSE Farnesyl pyrophosphate synthase OS=Mus musculus GN=Fdps PE=1 SV=1	-17.1624	11	40.5	353	9	0.214286	0.637894	7
c851	c851.a1	c851.a1.a1	sp|Q64737-2|PUR2_MOUSE Isoform Short of Trifunctional purine biosynthetic protein adenosine-3 OS=Mus musculus GN=Gart	-20.6664	11	45.6	433	9	0.176471	0.501311	7
c851	c851.a1	c851.a1.a2	sp|Q64737|PUR2_MOUSE Trifunctional purine biosynthetic protein adenosine-3 OS=Mus musculus GN=Gart PE=1 SV=3	-20.6664	4	107.3	1010	9	0.0833333	0.211528	7
c852	c852.a1	c852.a1.a1	sp|Q91V92|ACLY_MOUSE ATP-citrate synthase OS=Mus musculus GN=Acly PE=1 SV=1	-11.5659	3	119.5	1091	9	0.06	0.148154	8
c853	c853.a1	c853.a1.a1	sp|Q9R0Q3|TMED2_MOUSE Transmembrane emp24 domain-containing protein 2 OS=Mus musculus GN=Tmed2 PE=1 SV=1	-6.20482	10	22.6	201	8	0.333333	1.15443	7
c854	c854.a1	c854.a1.a1	sp|Q91VZ6|SMAP1_MOUSE Stromal membrane-associated protein 1 OS=Mus musculus GN=Smap1 PE=1 SV=1	-9.52172	4	47.5	440	8	0.25	0.778279	5
c855	c855.a1	c855.a1.a1	sp|Q9ET26|RN114_MOUSE E3 ubiquitin-protein ligase RNF114 OS=Mus musculus GN=Rnf114 PE=1 SV=2	-12.2455	23	25.6	229	8	0.416667	1.61016	4
c856	c856.a1	c856.a1.a1	sp|Q9DD18|DTD1_MOUSE D-tyrosyl-tRNA(Tyr) deacylase 1 OS=Mus musculus GN=Dtd1 PE=1 SV=2	-13.8671	19	23.3	209	8	0.333333	1.15443	7
c857	c857.a1	c857.a1.a1	sp|Q9CZX8|RS19_MOUSE 40S ribosomal protein S19 OS=Mus musculus GN=Rps19 PE=1 SV=3	-11.2132	22	16	145	8	0.666667	3.64159	5
c858	c858.a1	c858.a1.a1	sp|P62264|RS14_MOUSE 40S ribosomal protein S14 OS=Mus musculus GN=Rps14 PE=1 SV=3	-21.6805	30	16.2	151	8	1	9	3
c859	c859.a1	c859.a1.a1	sp|Q9CXW4|RL11_MOUSE 60S ribosomal protein L11 OS=Mus musculus GN=Rpl11 PE=1 SV=4	-13.8927	19	20.2	178	8	0.333333	1.15443	5
c860	c860.a1	c860.a1.a1	sp|P58404-2|STRN4_MOUSE Isoform 2 of Striatin-4 OS=Mus musculus GN=Strn4	-11.9488	4	80.8	753	8	0.0869565	0.221677	7
c860	c860.a1	c860.a1.a2	sp|P58404|STRN4_MOUSE Striatin-4 OS=Mus musculus GN=Strn4 PE=1 SV=2	-11.9488	4	81.5	760	8	0.0869565	0.221677	7
c861	c861.a1	c861.a1.a1	sp|B2RUP2-2|UN13D_MOUSE Isoform 2 of Protein unc-13 homolog D OS=Mus musculus GN=Unc13d	-15.0324	5	122.7	1083	8	0.105263	0.274275	5
c861	c861.a1	c861.a1.a2	sp|B2RUP2|UN13D_MOUSE Protein unc-13 homolog D OS=Mus musculus GN=Unc13d PE=1 SV=2	-15.0324	5	122.9	1085	8	0.105263	0.274275	5
c862	c862.a1	c862.a1.a1	sp|O88842|FGD3_MOUSE FYVE, RhoGEF and PH domain-containing protein 3 OS=Mus musculus GN=Fgd3 PE=1 SV=1	-18.6268	14	80.5	733	8	0.192308	0.557068	6
c863	c863.a1	c863.a1.a1	sp|P99027|RLA2_MOUSE 60S acidic ribosomal protein P2 OS=Mus musculus GN=Rplp2 PE=1 SV=3	-21.7407	68	11.6	115	8	0.8	5.30957	4
c864	c864.a1	c864.a1.a1	sp|Q791V5|MTCH2_MOUSE Mitochondrial carrier homolog 2 OS=Mus musculus GN=Mtch2 PE=1 SV=1	-15.8058	21	33.4	303	8	0.307692	1.03092	5
c865	c865.a1	c865.a1.a1	sp|Q3UHX2|HAP28_MOUSE 28 kDa heat- and acid-stable phosphoprotein OS=Mus musculus GN=Pdap1 PE=1 SV=1	-12.71	15	20.5	181	8	0.333333	1.15443	4
c866	c866.a1	c866.a1.a1	sp|Q9WUR2-2|ECI2_MOUSE Isoform 2 of Enoyl-CoA delta isomerase 2, mitochondrial OS=Mus musculus GN=Eci2	-13.107	15	39.4	358	8	0.363636	1.31013	5
c866	c866.a1	c866.a1.a2	sp|Q9WUR2|ECI2_MOUSE Enoyl-CoA delta isomerase 2, mitochondrial OS=Mus musculus GN=Eci2 PE=1 SV=2	-13.107	14	43.2	391	8	0.307692	1.03092	5
c867	c867.a1	c867.a1.a1	sp|Q8BGH2|SAM50_MOUSE Sorting and assembly machinery component 50 homolog OS=Mus musculus GN=Samm50 PE=1 SV=1	-17.7743	18	51.7	469	8	0.227273	0.687612	4
c868	c868.a1	c868.a1.a1	sp|Q6A065|CE170_MOUSE Centrosomal protein of 170 kDa OS=Mus musculus GN=Cep170 PE=1 SV=2	-14.3935	3	174.8	1588	8	0.056338	0.138513	6
c869	c869.a1	c869.a1.a1	sp|P11688|ITA5_MOUSE Integrin alpha-5 OS=Mus musculus GN=Itga5 PE=1 SV=3	-7.18642	3	114.8	1053	8	0.0526316	0.128838	6
c870	c870.a1	c870.a1.a1	sp|Q91Z53|GRHPR_MOUSE Glyoxylate reductase/hydroxypyruvate reductase OS=Mus musculus GN=Grhpr PE=1 SV=1	-25.0502	36	35.2	328	8	0.6	2.98107	6
c871	c871.a1	c871.a1.a1	sp|O55135|IF6_MOUSE Eukaryotic translation initiation factor 6 OS=Mus musculus GN=Eif6 PE=1 SV=2	-10.3639	22	26.4	245	8	0.428571	1.6827	5
c872	c872.a1	c872.a1.a1	sp|Q8R010|AIMP2_MOUSE Aminoacyl tRNA synthase complex-interacting multifunctional protein 2 OS=Mus musculus GN=Aimp2 PE=1 SV=2	-6.66555	6	35.3	320	8	0.181818	0.519911	7
c873	c873.a1	c873.a1.a1	sp|Q6PA06-2|ATLA2_MOUSE Isoform 2 of Atlastin-2 OS=Mus musculus GN=Atl2	-15.3319	13	44.2	388	8	0.15	0.412538	7
c873	c873.a1	c873.a1.a2	sp|Q6PA06|ATLA2_MOUSE Atlastin-2 OS=Mus musculus GN=Atl2 PE=1 SV=1	-15.3319	8	66.1	583	8	0.111111	0.29155	7
c874	c874.a1	c874.a1.a1	sp|P52430|PON1_MOUSE Serum paraoxonase/arylesterase 1 OS=Mus musculus GN=Pon1 PE=1 SV=2	-13.9608	15	39.5	355	8	0.25	0.778279	6
c875	c875.a1	c875.a1.a1	sp|Q921M4-2|GOGA2_MOUSE Isoform 2 of Golgin subfamily A member 2 OS=Mus musculus GN=Golga2	-17.3802	3	109.9	967	8	0.0882353	0.22528	5
c875	c875.a1	c875.a1.a2	sp|Q921M4|GOGA2_MOUSE Golgin subfamily A member 2 OS=Mus musculus GN=Golga2 PE=1 SV=3	-17.3802	3	113.1	999	8	0.0882353	0.22528	5
c876	c876.a1	c876.a1.a1	sp|Q3ULD5|MCCB_MOUSE Methylcrotonoyl-CoA carboxylase beta chain, mitochondrial OS=Mus musculus GN=Mccc2 PE=1 SV=1	-14.13	10	61.2	563	8	0.153846	0.425103	7
c877	c877.a1	c877.a1.a1	sp|Q9JJ28|FLII_MOUSE Protein flightless-1 homolog OS=Mus musculus GN=Flii PE=1 SV=1	-5.94654	1	144.6	1271	8	0.037037	0.089023	6
c878	c878.a1	c878.a1.a1	sp|P45878|FKBP2_MOUSE Peptidyl-prolyl cis-trans isomerase FKBP2 OS=Mus musculus GN=Fkbp2 PE=1 SV=1	-12.3304	34	15.3	140	8	0.6	2.98107	6
c879	c879.a1	c879.a1.a1	sp|Q9D1P4|CHRD1_MOUSE Cysteine and histidine-rich domain-containing protein 1 OS=Mus musculus GN=Chordc1 PE=1 SV=1	-13.0501	11	37.2	331	8	0.25	0.778279	6
c880	c880.a1	c880.a1.a1	sp|P38060|HMGCL_MOUSE Hydroxymethylglutaryl-CoA lyase, mitochondrial OS=Mus musculus GN=Hmgcl PE=1 SV=2	-11.2244	15	34.1	325	8	0.307692	1.03092	7
c881	c881.a1	c881.a1.a1	sp|P83510|TNIK_MOUSE Traf2 and NCK-interacting protein kinase OS=Mus musculus GN=Tnik PE=1 SV=2	-9.30857	4	150.1	1323	7	0.0851064	0.216484	4
c882	c882.a1	c882.a1.a1	sp|P62301|RS13_MOUSE 40S ribosomal protein S13 OS=Mus musculus GN=Rps13 PE=1 SV=2	-20.5081	32	17.1	151	7	0.625	3.21697	3
c883	c883.a1	c883.a1.a1	sp|P62918|RL8_MOUSE 60S ribosomal protein L8 OS=Mus musculus GN=Rpl8 PE=1 SV=2	-14.2192	22	27.9	257	7	0.6	2.98107	4
c884	c884.a1	c884.a1.a1	sp|Q9Z1R2|BAG6_MOUSE Large proline-rich protein BAG6 OS=Mus musculus GN=Bag6 PE=1 SV=1	-9.81531	3	120.8	1154	7	0.0689655	0.172102	6
c885	c885.a1	c885.a1.a1	sp|P31230|AIMP1_MOUSE Aminoacyl tRNA synthase complex-interacting multifunctional protein 1 OS=Mus musculus GN=Aimp1 PE=1 SV=2	-14.1202	16	33.9	310	7	0.230769	0.701254	5
c886	c886.a1	c886.a1.a1	sp|Q61753|SERA_MOUSE D-3-phosphoglycerate dehydrogenase OS=Mus musculus GN=Phgdh PE=1 SV=3	-10.3682	6	56.5	533	7	0.142857	0.389495	5
c887	c887.a1	c887.a1.a1	sp|P70372|ELAV1_MOUSE ELAV-like protein 1 OS=Mus musculus GN=Elavl1 PE=1 SV=2	-13.5105	16	36.1	326	7	0.285714	0.930698	6
c888	c888.a1	c888.a1.a1	sp|Q9QYA2|TOM40_MOUSE Mitochondrial import receptor subunit TOM40 homolog OS=Mus musculus GN=Tomm40 PE=1 SV=3	-23.748	18	37.8	361	7	0.333333	1.15443	6
c889	c889.a1	c889.a1.a1	sp|Q8CHP8|PGP_MOUSE Glycerol-3-phosphate phosphatase OS=Mus musculus GN=Pgp PE=1 SV=1	-15.0472	14	34.4	321	7	0.230769	0.701254	4
c890	c890.a1	c890.a1.a1	sp|Q8BYW1-2|RHG25_MOUSE Isoform 2 of Rho GTPase-activating protein 25 OS=Mus musculus GN=Arhgap25	-13.9857	9	62.7	559	7	0.125	0.333521	6
c890	c890.a1	c890.a1.a2	sp|Q8BYW1-3|RHG25_MOUSE Isoform 3 of Rho GTPase-activating protein 25 OS=Mus musculus GN=Arhgap25	-13.9857	8	70.2	622	7	0.117647	0.311134	6
c890	c890.a1	c890.a1.a3	sp|Q8BYW1|RHG25_MOUSE Rho GTPase-activating protein 25 OS=Mus musculus GN=Arhgap25 PE=1 SV=2	-13.9857	8	73.2	648	7	0.114286	0.301025	6
c891	c891.a1	c891.a1.a1	sp|P63276|RS17_MOUSE 40S ribosomal protein S17 OS=Mus musculus GN=Rps17 PE=1 SV=2	-39.9797	47	15.4	135	7	1.2	14.8489	3
c892	c892.a1	c892.a1.a1	sp|Q9CQC7|NDUB4_MOUSE NADH dehydrogenase [ubiquinone] 1 beta subcomplex subunit 4 OS=Mus musculus GN=Ndufb4 PE=1 SV=3	-7.28718	29	15	129	7	0.4	1.51189	5
c893	c893.a1	c893.a1.a1	sp|Q8BJW6-2|EIF2A_MOUSE Isoform 2 of Eukaryotic translation initiation factor 2A OS=Mus musculus GN=Eif2a	-10.4584	5	54	487	7	0.117647	0.311134	6
c893	c893.a1	c893.a1.a2	sp|Q8BJW6|EIF2A_MOUSE Eukaryotic translation initiation factor 2A OS=Mus musculus GN=Eif2a PE=1 SV=2	-10.4584	4	64.3	581	7	0.0909091	0.232847	6
c894	c894.a1	c894.a1.a1	sp|Q8R5J9|PRAF3_MOUSE PRA1 family protein 3 OS=Mus musculus GN=Arl6ip5 PE=1 SV=2	-7.67778	10	21.5	188	7	0.5	2.16228	6
c895	c895.a1	c895.a1.a1	sp|Q64516-1|GLPK_MOUSE Isoform 1 of Glycerol kinase OS=Mus musculus GN=Gk	-17.3492	9	57.3	524	7	0.142857	0.389495	6
c895	c895.a1	c895.a1.a2	sp|Q64516-2|GLPK_MOUSE Isoform 2 of Glycerol kinase OS=Mus musculus GN=Gk	-17.3492	9	60.4	553	7	0.148148	0.406527	6
c895	c895.a1	c895.a1.a3	sp|Q64516|GLPK_MOUSE Glycerol kinase OS=Mus musculus GN=Gk PE=1 SV=2	-17.3492	9	61.1	559	7	0.148148	0.406527	6
c896	c896.a1	c896.a1.a1	sp|Q9CR16|PPID_MOUSE Peptidyl-prolyl cis-trans isomerase D OS=Mus musculus GN=Ppid PE=1 SV=3	-14.1319	9	40.6	370	7	0.166667	0.467799	5
c897	c897.a1	c897.a1.a1	sp|P0C605-2|KGP1_MOUSE Isoform Beta of cGMP-dependent protein kinase 1 OS=Mus musculus GN=Prkg1	-12.549	5	77.6	686	7	0.0909091	0.232847	6
c897	c897.a1	c897.a1.a2	sp|P0C605|KGP1_MOUSE cGMP-dependent protein kinase 1 OS=Mus musculus GN=Prkg1 PE=1 SV=1	-12.549	5	76.2	671	7	0.09375	0.240938	6
c898	c898.a1	c898.a1.a1	sp|Q9DCJ9|NPL_MOUSE N-acetylneuraminate lyase OS=Mus musculus GN=Npl PE=1 SV=1	-13.1518	26	35	320	7	0.357143	1.27585	5
c899	c899.a1	c899.a1.a1	sp|Q91YJ2|SNX4_MOUSE Sorting nexin-4 OS=Mus musculus GN=Snx4 PE=1 SV=1	-6.54516	5	51.7	450	7	0.0869565	0.221677	6
c900	c900.a1	c900.a1.a1	sp|Q9D1J1|NECP2_MOUSE Adaptin ear-binding coat-associated protein 2 OS=Mus musculus GN=Necap2 PE=1 SV=1	-12.3731	15	28.5	266	7	0.181818	0.519911	6
c901	c901.a1	c901.a1.a1	sp|Q6P9R2|OXSR1_MOUSE Serine/threonine-protein kinase OSR1 OS=Mus musculus GN=Oxsr1 PE=1 SV=1	-12.0333	10	58.1	527	7	0.2	0.584893	5
c902	c902.a1	c902.a1.a1	sp|Q8BH59|CMC1_MOUSE Calcium-binding mitochondrial carrier protein Aralar1 OS=Mus musculus GN=Slc25a12 PE=1 SV=1	-21.7747	8	74.4	677	7	0.125	0.333521	5
c903	c903.a1	c903.a1.a1	sp|P47911|RL6_MOUSE 60S ribosomal protein L6 OS=Mus musculus GN=Rpl6 PE=1 SV=3	-11.313	13	33.4	296	7	0.272727	0.873817	4
c904	c904.a1	c904.a1.a1	sp|P15327|PMGE_MOUSE Bisphosphoglycerate mutase OS=Mus musculus GN=Bpgm PE=1 SV=2	-12.4103	12	29.9	259	6	0.333333	1.15443	4
c905	c905.a1	c905.a1.a1	sp|Q3ULJ0-2|GPD1L_MOUSE Isoform 2 of Glycerol-3-phosphate dehydrogenase 1-like protein OS=Mus musculus GN=Gpd1l	-6.71806	9	34.5	320	6	0.125	0.333521	4
c905	c905.a1	c905.a1.a2	sp|Q3ULJ0|GPD1L_MOUSE Glycerol-3-phosphate dehydrogenase 1-like protein OS=Mus musculus GN=Gpd1l PE=1 SV=2	-6.71806	8	38.1	351	6	0.111111	0.29155	4
c906	c906.a1	c906.a1.a1	sp|P47758|SRPRB_MOUSE Signal recognition particle receptor subunit beta OS=Mus musculus GN=Srprb PE=1 SV=1	-6.94885	12	29.5	269	6	0.142857	0.389495	5
c907	c907.a1	c907.a1.a1	sp|P0C0A3|CHMP6_MOUSE Charged multivesicular body protein 6 OS=Mus musculus GN=Chmp6 PE=1 SV=2	-6.42366	13	23.3	200	6	0.5	2.16228	5
c908	c908.a1	c908.a1.a1	sp|Q9QZ88-2|VPS29_MOUSE Isoform 2 of Vacuolar protein sorting-associated protein 29 OS=Mus musculus GN=Vps29	-5.81248	11	20.8	186	6	0.25	0.778279	5
c908	c908.a1	c908.a1.a2	sp|Q9QZ88|VPS29_MOUSE Vacuolar protein sorting-associated protein 29 OS=Mus musculus GN=Vps29 PE=1 SV=1	-5.81248	11	20.4	182	6	0.25	0.778279	5
c909	c909.a1	c909.a1.a1	sp|P22892|AP1G1_MOUSE AP-1 complex subunit gamma-1 OS=Mus musculus GN=Ap1g1 PE=1 SV=3	-15.1835	8	91.2	822	6	0.137931	0.373824	4
c910	c910.a1	c910.a1.a1	sp|Q61035|SYHC_MOUSE Histidine--tRNA ligase, cytoplasmic OS=Mus musculus GN=Hars PE=1 SV=2	-7.88933	5	57.3	509	6	0.130435	0.350314	5
c911	c911.a1	c911.a1.a1	sp|Q9QXT0|CNPY2_MOUSE Protein canopy homolog 2 OS=Mus musculus GN=Cnpy2 PE=1 SV=1	-10.3338	19	20.7	182	6	0.272727	0.873817	5
c912	c912.a1	c912.a1.a1	sp|Q9QXC1|FETUB_MOUSE Fetuin-B OS=Mus musculus GN=Fetub PE=1 SV=1	-17.2007	9	42.6	388	6	0.153846	0.425103	5
c913	c913.a1	c913.a1.a1	sp|Q9CQZ5|NDUA6_MOUSE NADH dehydrogenase [ubiquinone] 1 alpha subcomplex subunit 6 OS=Mus musculus GN=Ndufa6 PE=1 SV=1	-10.1025	27	15.2	131	6	0.5	2.16228	4
c914	c914.a1	c914.a1.a1	sp|P48678-2|LMNA_MOUSE Isoform C of Prelamin-A/C OS=Mus musculus GN=Lmna	-19.0251	7	65.3	574	6	0.0909091	0.232847	5
c914	c914.a1	c914.a1.a2	sp|P48678|LMNA_MOUSE Prelamin-A/C OS=Mus musculus GN=Lmna PE=1 SV=2	-19.0251	6	74.1	665	6	0.0769231	0.193777	5
c915	c915.a1	c915.a1.a1	sp|O08585|CLCA_MOUSE Clathrin light chain A OS=Mus musculus GN=Clta PE=1 SV=2	-19.8669	26	25.5	235	6	0.5	2.16228	4
c916	c916.a1	c916.a1.a1	sp|P61079|UB2D3_MOUSE Ubiquitin-conjugating enzyme E2 D3 OS=Mus musculus GN=Ube2d3 PE=1 SV=1	-6.31876	19	16.6	147	6	1	9	5
c916	c916.a1	c916.a1.a2	sp|P62838|UB2D2_MOUSE Ubiquitin-conjugating enzyme E2 D2 OS=Mus musculus GN=Ube2d2 PE=1 SV=1	-6.31876	19	16.6	147	6	0.666667	3.64159	5
c917	c917.a1	c917.a1.a1	sp|Q9CPQ8|ATP5L_MOUSE ATP synthase subunit g, mitochondrial OS=Mus musculus GN=Atp5l PE=1 SV=1	-12.3881	32	11.3	103	6	1	9	4
c918	c918.a1	c918.a1.a1	sp|P25444|RS2_MOUSE 40S ribosomal protein S2 OS=Mus musculus GN=Rps2 PE=1 SV=3	-18.3162	20	31.1	293	6	0.416667	1.61016	2
c919	c919.a1	c919.a1.a1	sp|O35381|AN32A_MOUSE Acidic leucine-rich nuclear phosphoprotein 32 family member A OS=Mus musculus GN=Anp32a PE=1 SV=1	-14.0048	10	28.4	247	6	0.25	0.778279	5
c920	c920.a1	c920.a1.a1	sp|P62889|RL30_MOUSE 60S ribosomal protein L30 OS=Mus musculus GN=Rpl30 PE=1 SV=2	-9.27737	24	12.7	115	6	0.333333	1.15443	5
c921	c921.a1	c921.a1.a1	sp|Q61937|NPM_MOUSE Nucleophosmin OS=Mus musculus GN=Npm1 PE=1 SV=1	-14.8771	22	32.5	292	6	0.571429	2.72759	2
c922	c922.a1	c922.a1.a1	sp|Q6PHU5-2|SORT_MOUSE Isoform 2 of Sortilin OS=Mus musculus GN=Sort1	-9.44322	3	94.6	858	6	0.107143	0.279802	5
c922	c922.a1	c922.a1.a2	sp|Q6PHU5|SORT_MOUSE Sortilin OS=Mus musculus GN=Sort1 PE=1 SV=1	-9.44322	3	91	825	6	0.107143	0.279802	5
c923	c923.a1	c923.a1.a1	sp|P61087|UBE2K_MOUSE Ubiquitin-conjugating enzyme E2 K OS=Mus musculus GN=Ube2k PE=1 SV=3	-15.1949	20	22.3	200	6	0.272727	0.873817	5
c924	c924.a1	c924.a1.a1	sp|Q9CQW1|YKT6_MOUSE Synaptobrevin homolog YKT6 OS=Mus musculus GN=Ykt6 PE=1 SV=1	-16.8794	15	22.2	198	6	0.166667	0.467799	4
c925	c925.a1	c925.a1.a1	sp|Q9Z204-2|HNRPC_MOUSE Isoform C1 of Heterogeneous nuclear ribonucleoproteins C1/C2 OS=Mus musculus GN=Hnrnpc	-9.16749	7	33	300	6	0.117647	0.311134	4
c925	c925.a1	c925.a1.a2	sp|Q9Z204-3|HNRPC_MOUSE Isoform 3 of Heterogeneous nuclear ribonucleoproteins C1/C2 OS=Mus musculus GN=Hnrnpc	-9.16749	8	32.2	293	6	0.125	0.333521	4
c925	c925.a1	c925.a1.a3	sp|Q9Z204-4|HNRPC_MOUSE Isoform 4 of Heterogeneous nuclear ribonucleoproteins C1/C2 OS=Mus musculus GN=Hnrnpc	-9.16749	8	32.1	292	6	0.125	0.333521	4
c925	c925.a1	c925.a1.a4	sp|Q9Z204-5|HNRPC_MOUSE Isoform 5 of Heterogeneous nuclear ribonucleoproteins C1/C2 OS=Mus musculus GN=Hnrnpc	-9.16749	7	33.5	306	6	0.133333	0.359356	4
c925	c925.a1	c925.a1.a5	sp|Q9Z204|HNRPC_MOUSE Heterogeneous nuclear ribonucleoproteins C1/C2 OS=Mus musculus GN=Hnrnpc PE=1 SV=1	-9.16749	7	34.3	313	6	0.125	0.333521	4
c926	c926.a1	c926.a1.a1	sp|P29758|OAT_MOUSE Ornithine aminotransferase, mitochondrial OS=Mus musculus GN=Oat PE=1 SV=1	-17.5346	17	48.2	439	6	0.2	0.584893	5
c927	c927.a1	c927.a1.a1	sp|P33622|APOC3_MOUSE Apolipoprotein C-III OS=Mus musculus GN=Apoc3 PE=1 SV=2	-18.3372	40	10.9	99	6	0.4	1.51189	4
c928	c928.a1	c928.a1.a1	sp|Q6WVG3|KCD12_MOUSE BTB/POZ domain-containing protein KCTD12 OS=Mus musculus GN=Kctd12 PE=1 SV=1	-16.1013	18	35.8	327	6	0.25	0.778279	5
c929	c929.a1	c929.a1.a1	sp|Q8BKC5-2|IPO5_MOUSE Isoform 2 of Importin-5 OS=Mus musculus GN=Ipo5	-11.3556	5	116.7	1037	6	0.0789474	0.199354	4
c929	c929.a1	c929.a1.a2	sp|Q8BKC5|IPO5_MOUSE Importin-5 OS=Mus musculus GN=Ipo5 PE=1 SV=3	-11.3556	5	123.4	1097	6	0.0714286	0.178769	4
c930	c930.a1	c930.a1.a1	sp|Q148V7-2|K1468_MOUSE Isoform 2 of LisH domain and HEAT repeat-containing protein KIAA1468 OS=Mus musculus GN=Kiaa1468	-7.59929	2	131.7	1192	6	0.04	0.0964782	4
c930	c930.a1	c930.a1.a2	sp|Q148V7|K1468_MOUSE LisH domain and HEAT repeat-containing protein KIAA1468 OS=Mus musculus GN=Kiaa1468 PE=1 SV=1	-7.59929	1	134.4	1216	6	0.0384615	0.0926009	4
c931	c931.a1	c931.a1.a1	sp|A2AIV2|VIR_MOUSE Protein virilizer homolog OS=Mus musculus GN=Kiaa1429 PE=1 SV=1	-5.40318	1	201.1	1811	5	0.025641	0.0608184	4
c932	c932.a1	c932.a1.a1	sp|Q8BNU0|ARMC6_MOUSE Armadillo repeat-containing protein 6 OS=Mus musculus GN=Armc6 PE=1 SV=1	-6.74425	6	50.6	468	5	0.111111	0.29155	4
c933	c933.a1	c933.a1.a1	sp|P62911|RL32_MOUSE 60S ribosomal protein L32 OS=Mus musculus GN=Rpl32 PE=1 SV=2	-11.8794	16	15.8	135	5	0.4	1.51189	3
c934	c934.a1	c934.a1.a1	sp|O70274|TP4A2_MOUSE Protein tyrosine phosphatase type IVA 2 OS=Mus musculus GN=Ptp4a2 PE=1 SV=1	-12.2907	13	19	167	5	0.333333	1.15443	3
c934	c934.a1	c934.a1.a2	sp|Q63739|TP4A1_MOUSE Protein tyrosine phosphatase type IVA 1 OS=Mus musculus GN=Ptp4a1 PE=1 SV=1	-12.2907	12	19.7	173	5	0.375	1.37137	3
c935	c935.a1	c935.a1.a1	sp|P61358|RL27_MOUSE 60S ribosomal protein L27 OS=Mus musculus GN=Rpl27 PE=1 SV=2	-9.08703	29	15.7	136	5	0.6	2.98107	3
c936	c936.a1	c936.a1.a1	sp|Q9CPT4|MYDGF_MOUSE Myeloid-derived growth factor OS=Mus musculus GN=Mydgf PE=1 SV=1	-9.47392	20	17.9	166	5	0.5	2.16228	4
c937	c937.a1	c937.a1.a1	sp|Q9Z2D6-2|MECP2_MOUSE Isoform B of Methyl-CpG-binding protein 2 OS=Mus musculus GN=Mecp2	-17.6852	15	53.4	501	5	0.136364	0.368875	3
c938	c938.a1	c938.a1.a1	sp|P12970|RL7A_MOUSE 60S ribosomal protein L7a OS=Mus musculus GN=Rpl7a PE=1 SV=2	-14.6812	17	29.9	266	5	0.4	1.51189	3
c939	c939.a1	c939.a1.a1	sp|Q9WUK2-2|IF4H_MOUSE Isoform Short of Eukaryotic translation initiation factor 4H OS=Mus musculus GN=Eif4h	-10.6356	19	25.1	228	5	0.428571	1.6827	3
c939	c939.a1	c939.a1.a2	sp|Q9WUK2|IF4H_MOUSE Eukaryotic translation initiation factor 4H OS=Mus musculus GN=Eif4h PE=1 SV=3	-10.6356	17	27.2	248	5	0.375	1.37137	3
c940	c940.a1	c940.a1.a1	sp|P35285|RB22A_MOUSE Ras-related protein Rab-22A OS=Mus musculus GN=Rab22a PE=1 SV=2	-11.6236	29	21.7	194	5	0.333333	1.15443	2
c941	c941.a1	c941.a1.a1	sp|P62900|RL31_MOUSE 60S ribosomal protein L31 OS=Mus musculus GN=Rpl31 PE=1 SV=1	-6.22621	18	14.4	125	5	0.333333	1.15443	3
c942	c942.a1	c942.a1.a1	sp|Q8BYP3|RHOF_MOUSE Rho-related GTP-binding protein RhoF OS=Mus musculus GN=Rhof PE=1 SV=1	-17.59	25	23.5	211	5	0.333333	1.15443	3
c943	c943.a1	c943.a1.a1	sp|O70591|PFD2_MOUSE Prefoldin subunit 2 OS=Mus musculus GN=Pfdn2 PE=1 SV=2	-8.67366	14	16.4	154	5	0.285714	0.930698	4
c944	c944.a1	c944.a1.a1	sp|P70404|IDHG1_MOUSE Isocitrate dehydrogenase [NAD] subunit gamma 1, mitochondrial OS=Mus musculus GN=Idh3g PE=1 SV=1	-12.7223	13	42.7	393	5	0.230769	0.701254	4
c945	c945.a1	c945.a1.a1	sp|P24547|IMDH2_MOUSE Inosine-5'-monophosphate dehydrogenase 2 OS=Mus musculus GN=Impdh2 PE=1 SV=2	-11.7211	7	55.7	514	5	0.15	0.412538	4
c946	c946.a1	c946.a1.a1	sp|Q9DBS5|KLC4_MOUSE Kinesin light chain 4 OS=Mus musculus GN=Klc4 PE=1 SV=1	-12.9306	8	68.5	619	5	0.0967742	0.249609	3
c947	c947.a1	c947.a1.a1	sp|Q8VDW0|DX39A_MOUSE ATP-dependent RNA helicase DDX39A OS=Mus musculus GN=Ddx39a PE=1 SV=1	-9.23284	4	48.9	427	5	0.117647	0.311134	3
c947	c947.a1	c947.a1.a2	sp|Q9Z1N5|DX39B_MOUSE Spliceosome RNA helicase Ddx39b OS=Mus musculus GN=Ddx39b PE=1 SV=1	-9.23284	4	48.9	428	5	0.117647	0.311134	3
c948	c948.a1	c948.a1.a1	sp|Q9EQU5-2|SET_MOUSE Isoform 2 of Protein SET OS=Mus musculus GN=Set	-18.6963	13	32	277	5	0.5	2.16228	4
c948	c948.a1	c948.a1.a2	sp|Q9EQU5|SET_MOUSE Protein SET OS=Mus musculus GN=Set PE=1 SV=1	-18.6963	12	33.3	289	5	0.5	2.16228	4
c949	c949.a1	c949.a1.a1	sp|P50096|IMDH1_MOUSE Inosine-5'-monophosphate dehydrogenase 1 OS=Mus musculus GN=Impdh1 PE=1 SV=2	-11.4137	8	55.1	514	5	0.222222	0.668101	3
c950	c950.a1	c950.a1.a1	sp|Q91YT0|NDUV1_MOUSE NADH dehydrogenase [ubiquinone] flavoprotein 1, mitochondrial OS=Mus musculus GN=Ndufv1 PE=1 SV=1	-15.0161	20	50.7	464	5	0.294118	0.968419	4
c951	c951.a1	c951.a1.a1	sp|Q7TQ95|LNP_MOUSE Protein lunapark OS=Mus musculus GN=Lnp PE=1 SV=1	-10.136	11	47.4	425	5	0.166667	0.467799	3
c952	c952.a1	c952.a1.a1	sp|Q62393-2|TPD52_MOUSE Isoform 2 of Tumor protein D52 OS=Mus musculus GN=Tpd52	-14.1455	38	20	185	5	0.8	5.30957	3
c952	c952.a1	c952.a1.a2	sp|Q62393-3|TPD52_MOUSE Isoform 3 of Tumor protein D52 OS=Mus musculus GN=Tpd52	-14.1455	35	21.6	199	5	0.571429	2.72759	3
c952	c952.a1	c952.a1.a3	sp|Q62393|TPD52_MOUSE Tumor protein D52 OS=Mus musculus GN=Tpd52 PE=1 SV=2	-14.1455	31	24.2	224	5	0.666667	3.64159	3
c953	c953.a1	c953.a1.a1	sp|Q6ZWN5|RS9_MOUSE 40S ribosomal protein S9 OS=Mus musculus GN=Rps9 PE=1 SV=3	-8.78021	13	22.5	194	5	0.4	1.51189	2
c954	c954.a1	c954.a1.a1	sp|Q8BL97-2|SRSF7_MOUSE Isoform 2 of Serine/arginine-rich splicing factor 7 OS=Mus musculus GN=Srsf7	-7.13077	8	27.3	238	4	0.25	0.778279	3
c954	c954.a1	c954.a1.a2	sp|Q8BL97-3|SRSF7_MOUSE Isoform 3 of Serine/arginine-rich splicing factor 7 OS=Mus musculus GN=Srsf7	-7.13077	13	17.8	157	4	0.25	0.778279	3
c954	c954.a1	c954.a1.a3	sp|Q8BL97-4|SRSF7_MOUSE Isoform 4 of Serine/arginine-rich splicing factor 7 OS=Mus musculus GN=Srsf7	-7.13077	9	25.9	226	4	0.25	0.778279	3
c954	c954.a1	c954.a1.a4	sp|Q8BL97|SRSF7_MOUSE Serine/arginine-rich splicing factor 7 OS=Mus musculus GN=Srsf7 PE=1 SV=1	-7.13077	7	30.7	267	4	0.2	0.584893	3
c954	c954.a2	c954.a2.a1	sp|P84104-2|SRSF3_MOUSE Isoform Short of Serine/arginine-rich splicing factor 3 OS=Mus musculus GN=Srsf3	-9.65365	16	14.1	124	3	0.285714	0.930698	2
c954	c954.a2	c954.a2.a2	sp|P84104|SRSF3_MOUSE Serine/arginine-rich splicing factor 3 OS=Mus musculus GN=Srsf3 PE=1 SV=1	-9.65365	12	19.2	164	3	0.333333	1.15443	2
c955	c955.a1	c955.a1.a1	sp|Q9CXI5|MANF_MOUSE Mesencephalic astrocyte-derived neurotrophic factor OS=Mus musculus GN=Manf PE=1 SV=1	-13.8447	24	20.3	179	5	0.333333	1.15443	4
c956	c956.a1	c956.a1.a1	sp|P62849-2|RS24_MOUSE Isoform 2 of 40S ribosomal protein S24 OS=Mus musculus GN=Rps24	-10.0878	20	15	130	5	0.5	2.16228	4
c956	c956.a1	c956.a1.a2	sp|P62849-3|RS24_MOUSE Isoform 3 of 40S ribosomal protein S24 OS=Mus musculus GN=Rps24	-10.0878	20	15.1	131	5	0.5	2.16228	4
c956	c956.a1	c956.a1.a3	sp|P62849|RS24_MOUSE 40S ribosomal protein S24 OS=Mus musculus GN=Rps24 PE=1 SV=1	-10.0878	20	15.3	133	5	0.5	2.16228	4
c957	c957.a1	c957.a1.a1	sp|Q8CBC4|CNST_MOUSE Consortin OS=Mus musculus GN=Cnst PE=1 SV=1	-7.64207	4	76.7	711	5	0.0909091	0.232847	4
c958	c958.a1	c958.a1.a1	sp|Q80UY2-2|KCMF1_MOUSE Isoform 2 of E3 ubiquitin-protein ligase KCMF1 OS=Mus musculus GN=Kcmf1	-12.1805	10	32	296	5	0.285714	0.930698	4
c958	c958.a1	c958.a1.a2	sp|Q80UY2|KCMF1_MOUSE E3 ubiquitin-protein ligase KCMF1 OS=Mus musculus GN=Kcmf1 PE=1 SV=1	-12.1805	8	41.7	381	5	0.2	0.584893	4
c959	c959.a1	c959.a1.a1	sp|P51125-2|ICAL_MOUSE Isoform 2 of Calpastatin OS=Mus musculus GN=Cast	-8.47242	5	82.6	769	4	0.111111	0.29155	2
c959	c959.a1	c959.a1.a2	sp|P51125-3|ICAL_MOUSE Isoform 3 of Calpastatin OS=Mus musculus GN=Cast	-8.47242	5	79.5	740	4	0.115385	0.304321	2
c959	c959.a1	c959.a1.a3	sp|P51125-6|ICAL_MOUSE Isoform 6 of Calpastatin OS=Mus musculus GN=Cast	-8.47242	5	83.5	773	4	0.107143	0.279802	2
c959	c959.a1	c959.a1.a4	sp|P51125-7|ICAL_MOUSE Isoform 7 of Calpastatin OS=Mus musculus GN=Cast	-8.47242	5	76.5	705	4	0.130435	0.350314	2
c959	c959.a1	c959.a1.a5	sp|P51125|ICAL_MOUSE Calpastatin OS=Mus musculus GN=Cast PE=1 SV=2	-8.47242	5	84.8	788	4	0.107143	0.279802	2
c960	c960.a1	c960.a1.a1	sp|Q7TSI3|PP6R1_MOUSE Serine/threonine-protein phosphatase 6 regulatory subunit 1 OS=Mus musculus GN=Ppp6r1 PE=1 SV=1	-6.25104	3	94.4	856	4	0.0740741	0.185971	3
c961	c961.a1	c961.a1.a1	sp|P62751|RL23A_MOUSE 60S ribosomal protein L23a OS=Mus musculus GN=Rpl23a PE=1 SV=1	-6.37161	15	17.6	156	4	0.4	1.51189	3
c962	c962.a1	c962.a1.a1	sp|Q9D024-2|CCD47_MOUSE Isoform 2 of Coiled-coil domain-containing protein 47 OS=Mus musculus GN=Ccdc47	-10.7918	6	54.7	477	4	0.117647	0.311134	3
c962	c962.a1	c962.a1.a2	sp|Q9D024|CCD47_MOUSE Coiled-coil domain-containing protein 47 OS=Mus musculus GN=Ccdc47 PE=1 SV=2	-10.7918	5	55.7	483	4	0.125	0.333521	3
c963	c963.a1	c963.a1.a1	sp|Q8BUK6|HOOK3_MOUSE Protein Hook homolog 3 OS=Mus musculus GN=Hook3 PE=1 SV=2	-11.7438	3	83.1	718	4	0.0588235	0.145048	3
c964	c964.a1	c964.a1.a1	sp|P97352|S10AD_MOUSE Protein S100-A13 OS=Mus musculus GN=S100a13 PE=1 SV=1	-5.77885	23	11.1	98	4	0.4	1.51189	3
c965	c965.a1	c965.a1.a1	sp|P62843|RS15_MOUSE 40S ribosomal protein S15 OS=Mus musculus GN=Rps15 PE=1 SV=2	-15.1068	19	17	145	4	0.4	1.51189	2
c966	c966.a1	c966.a1.a1	sp|O88384|VTI1B_MOUSE Vesicle transport through interaction with t-SNAREs homolog 1B OS=Mus musculus GN=Vti1b PE=1 SV=1	-9.7159	18	26.6	232	4	0.3	0.995262	3
c967	c967.a1	c967.a1.a1	sp|P47963|RL13_MOUSE 60S ribosomal protein L13 OS=Mus musculus GN=Rpl13 PE=1 SV=3	-12.0533	16	24.2	211	4	0.375	1.37137	2
c968	c968.a1	c968.a1.a1	sp|Q6PDM2-2|SRSF1_MOUSE Isoform 2 of Serine/arginine-rich splicing factor 1 OS=Mus musculus GN=Srsf1	-11.1537	10	22.2	201	4	0.166667	0.467799	3
c968	c968.a1	c968.a1.a2	sp|Q6PDM2-3|SRSF1_MOUSE Isoform 3 of Serine/arginine-rich splicing factor 1 OS=Mus musculus GN=Srsf1	-11.1537	11	21.7	196	4	0.166667	0.467799	3
c968	c968.a1	c968.a1.a3	sp|Q6PDM2|SRSF1_MOUSE Serine/arginine-rich splicing factor 1 OS=Mus musculus GN=Srsf1 PE=1 SV=3	-11.1537	8	27.6	248	4	0.166667	0.467799	3
c969	c969.a1	c969.a1.a1	sp|P01831|THY1_MOUSE Thy-1 membrane glycoprotein OS=Mus musculus GN=Thy1 PE=1 SV=1	-6.656	14	18	162	4	0.285714	0.930698	3
c970	c970.a1	c970.a1.a1	sp|P47962|RL5_MOUSE 60S ribosomal protein L5 OS=Mus musculus GN=Rpl5 PE=1 SV=3	-17.4191	17	34.3	297	4	0.363636	1.31013	1
c971	c971.a1	c971.a1.a1	sp|P09813|APOA2_MOUSE Apolipoprotein A-II OS=Mus musculus GN=Apoa2 PE=1 SV=2	-13.8611	33	11.2	102	4	0.5	2.16228	3
c972	c972.a1	c972.a1.a1	sp|P67984|RL22_MOUSE 60S ribosomal protein L22 OS=Mus musculus GN=Rpl22 PE=1 SV=2	-12.9152	30	14.7	128	4	1	9	3
c973	c973.a1	c973.a1.a1	sp|P81117|NUCB2_MOUSE Nucleobindin-2 OS=Mus musculus GN=Nucb2 PE=1 SV=2	-8.10791	7	50.2	420	4	0.111111	0.29155	3
c974	c974.a1	c974.a1.a1	sp|P10833|RRAS_MOUSE Ras-related protein R-Ras OS=Mus musculus GN=Rras PE=1 SV=1	-8.67101	11	23.7	218	4	0.142857	0.389495	3
c975	c975.a1	c975.a1.a1	sp|Q62189|SNRPA_MOUSE U1 small nuclear ribonucleoprotein A OS=Mus musculus GN=Snrpa PE=1 SV=3	-5.36452	6	31.7	287	4	0.2	0.584893	3
c976	c976.a1	c976.a1.a1	sp|P62281|RS11_MOUSE 40S ribosomal protein S11 OS=Mus musculus GN=Rps11 PE=1 SV=3	-11.6292	24	18.3	158	4	0.428571	1.6827	3
c977	c977.a1	c977.a1.a1	sp|Q9CWZ7|SNAG_MOUSE Gamma-soluble NSF attachment protein OS=Mus musculus GN=Napg PE=1 SV=1	-11.7093	8	34.6	312	4	0.125	0.333521	3
c978	c978.a1	c978.a1.a1	sp|O08583-2|THOC4_MOUSE Isoform 2 of THO complex subunit 4 OS=Mus musculus GN=Alyref	-19.6635	17	17.6	163	4	0.285714	0.930698	3
c978	c978.a1	c978.a1.a2	sp|O08583|THOC4_MOUSE THO complex subunit 4 OS=Mus musculus GN=Alyref PE=1 SV=3	-19.6635	11	26.8	255	4	0.25	0.778279	3
c978	c978.a1	c978.a1.a3	sp|Q9JJW6-2|ALRF2_MOUSE Isoform 2 of Aly/REF export factor 2 OS=Mus musculus GN=Alyref2	-19.6635	13	23.5	217	4	0.4	1.51189	3
c979	c979.a1	c979.a1.a1	sp|Q6ZWV7|RL35_MOUSE 60S ribosomal protein L35 OS=Mus musculus GN=Rpl35 PE=1 SV=1	-8.13513	18	14.5	123	4	1	9	2
c980	c980.a1	c980.a1.a1	sp|O88712-2|CTBP1_MOUSE Isoform 2 of C-terminal-binding protein 1 OS=Mus musculus GN=Ctbp1	-6.87943	5	46.5	430	4	0.166667	0.467799	3
c980	c980.a1	c980.a1.a2	sp|O88712|CTBP1_MOUSE C-terminal-binding protein 1 OS=Mus musculus GN=Ctbp1 PE=1 SV=2	-6.87943	4	47.6	441	4	0.153846	0.425103	3
c981	c981.a1	c981.a1.a1	sp|O70362|PHLD_MOUSE Phosphatidylinositol-glycan-specific phospholipase D OS=Mus musculus GN=Gpld1 PE=1 SV=1	-11.709	6	93.1	837	4	0.108108	0.28265	2
c982	c982.a1	c982.a1.a1	sp|P11032-2|GRAA_MOUSE Isoform HF2 of Granzyme A OS=Mus musculus GN=Gzma	-11.8195	16	28.4	257	4	0.1875	0.539927	3
c982	c982.a1	c982.a1.a2	sp|P11032|GRAA_MOUSE Granzyme A OS=Mus musculus GN=Gzma PE=1 SV=2	-11.8195	16	28.5	260	4	0.1875	0.539927	3
c983	c983.a1	c983.a1.a1	sp|Q9D8W5|PSD12_MOUSE 26S proteasome non-ATPase regulatory subunit 12 OS=Mus musculus GN=Psmd12 PE=1 SV=4	-11.9195	9	52.8	456	4	0.142857	0.389495	3
c984	c984.a1	c984.a1.a1	sp|P97290|IC1_MOUSE Plasma protease C1 inhibitor OS=Mus musculus GN=Serping1 PE=1 SV=3	-12.764	11	55.5	504	4	0.2	0.584893	3
c985	c985.a1	c985.a1.a1	sp|Q9CR62|M2OM_MOUSE Mitochondrial 2-oxoglutarate/malate carrier protein OS=Mus musculus GN=Slc25a11 PE=1 SV=3	-13.4973	8	34	314	4	0.117647	0.311134	3
c986	c986.a1	c986.a1.a1	sp|Q3U1J4|DDB1_MOUSE DNA damage-binding protein 1 OS=Mus musculus GN=Ddb1 PE=1 SV=2	-11.5719	5	126.6	1140	4	0.06	0.148154	3
c987	c987.a1	c987.a1.a1	sp|P04186|CFAB_MOUSE Complement factor B OS=Mus musculus GN=Cfb PE=1 SV=2	-7.10846	2	84.8	761	4	0.08	0.202264	3
c988	c988.a1	c988.a1.a1	sp|Q3TDN2-2|FAF2_MOUSE Isoform 2 of FAS-associated factor 2 OS=Mus musculus GN=Faf2	-6.01773	6	50.1	426	4	0.105263	0.274275	3
c988	c988.a1	c988.a1.a2	sp|Q3TDN2|FAF2_MOUSE FAS-associated factor 2 OS=Mus musculus GN=Faf2 PE=1 SV=2	-6.01773	6	52.3	445	4	0.0952381	0.245197	3
c989	c989.a1	c989.a1.a1	sp|O35658|C1QBP_MOUSE Complement component 1 Q subcomponent-binding protein, mitochondrial OS=Mus musculus GN=C1qbp PE=1 SV=1	-5.51046	14	30.9	278	4	0.2	0.584893	2
c990	c990.a1	c990.a1.a1	sp|Q9WUU7|CATZ_MOUSE Cathepsin Z OS=Mus musculus GN=Ctsz PE=1 SV=1	-9.8514	11	33.9	306	4	0.181818	0.519911	3
c991	c991.a1	c991.a1.a1	sp|Q9QWY8-2|ASAP1_MOUSE Isoform 2 of Arf-GAP with SH3 domain, ANK repeat and PH domain-containing protein 1 OS=Mus musculus GN=Asap1	-8.73224	4	121.5	1090	4	0.0625	0.154782	3
c991	c991.a1	c991.a1.a2	sp|Q9QWY8-3|ASAP1_MOUSE Isoform 3 of Arf-GAP with SH3 domain, ANK repeat and PH domain-containing protein 1 OS=Mus musculus GN=Asap1	-8.73224	4	126	1135	4	0.06	0.148154	3
c991	c991.a1	c991.a1.a3	sp|Q9QWY8-4|ASAP1_MOUSE Isoform 4 of Arf-GAP with SH3 domain, ANK repeat and PH domain-containing protein 1 OS=Mus musculus GN=Asap1	-8.73224	4	125.6	1132	4	0.06	0.148154	3
c991	c991.a1	c991.a1.a4	sp|Q9QWY8|ASAP1_MOUSE Arf-GAP with SH3 domain, ANK repeat and PH domain-containing protein 1 OS=Mus musculus GN=Asap1 PE=1 SV=2	-8.73224	4	127.2	1147	4	0.0588235	0.145048	3
c992	c992.a1	c992.a1.a1	sp|Q922Y1|UBXN1_MOUSE UBX domain-containing protein 1 OS=Mus musculus GN=Ubxn1 PE=1 SV=1	-12.383	19	33.5	297	4	0.25	0.778279	3
c993	c993.a1	c993.a1.a1	sp|Q91YI0|ARLY_MOUSE Argininosuccinate lyase OS=Mus musculus GN=Asl PE=1 SV=1	-13.8639	8	51.6	464	4	0.0833333	0.211528	3
c994	c994.a1	c994.a1.a1	sp|Q9CR57|RL14_MOUSE 60S ribosomal protein L14 OS=Mus musculus GN=Rpl14 PE=1 SV=3	-12.9755	10	23.5	217	4	0.4	1.51189	3
c995	c995.a1	c995.a1.a1	sp|P61961|UFM1_MOUSE Ubiquitin-fold modifier 1 OS=Mus musculus GN=Ufm1 PE=1 SV=1	-8.38838	58	9	85	4	0.666667	3.64159	3
c996	c996.a1	c996.a1.a1	sp|Q61419|CMAH_MOUSE Cytidine monophosphate-N-acetylneuraminic acid hydroxylase OS=Mus musculus GN=Cmah PE=1 SV=1	-10.7211	12	66.8	577	4	0.148148	0.406527	3
c997	c997.a1	c997.a1.a1	sp|Q8C7R4|UBA6_MOUSE Ubiquitin-like modifier-activating enzyme 6 OS=Mus musculus GN=Uba6 PE=1 SV=1	-6.18177	2	117.8	1053	4	0.0392157	0.0944998	3
c998	c998.a1	c998.a1.a1	sp|Q9QYR9|ACOT2_MOUSE Acyl-coenzyme A thioesterase 2, mitochondrial OS=Mus musculus GN=Acot2 PE=1 SV=2	-4.91829	3	49.5	453	4	0.0952381	0.245197	3
c999	c999.a1	c999.a1.a1	sp|P20065-2|TYB4_MOUSE Isoform Short of Thymosin beta-4 OS=Mus musculus GN=Tmsb4x	-7.29912	53	5	44	3	1	9	2
c999	c999.a1	c999.a1.a2	sp|P20065|TYB4_MOUSE Thymosin beta-4 OS=Mus musculus GN=Tmsb4x PE=1 SV=1	-7.29912	47	5.6	50	3	0.666667	3.64159	2
d1000	d1000.a1	d1000.a1.a1	sp|Q91VM5|RMXL1_MOUSE RNA binding motif protein, X-linked-like-1 OS=Mus musculus GN=Rbmxl1 PE=1 SV=1	-9.00436	11	42	388	3	0.2	0.584893	1
d1001	d1001.a1	d1001.a1.a1	sp|Q9CY57-2|CHTOP_MOUSE Isoform 2 of Chromatin target of PRMT1 protein OS=Mus musculus GN=Chtop	-7.93855	11	23.8	224	3	0.4	1.51189	2
d1001	d1001.a1	d1001.a1.a2	sp|Q9CY57-3|CHTOP_MOUSE Isoform 3 of Chromatin target of PRMT1 protein OS=Mus musculus GN=Chtop	-7.93855	12	21.9	202	3	0.4	1.51189	2
d1001	d1001.a1	d1001.a1.a3	sp|Q9CY57-4|CHTOP_MOUSE Isoform 4 of Chromatin target of PRMT1 protein OS=Mus musculus GN=Chtop	-7.93855	14	19.3	178	3	0.4	1.51189	2
d1001	d1001.a1	d1001.a1.a4	sp|Q9CY57-5|CHTOP_MOUSE Isoform 5 of Chromatin target of PRMT1 protein OS=Mus musculus GN=Chtop	-7.93855	14	19.2	177	3	0.4	1.51189	2
d1001	d1001.a1	d1001.a1.a5	sp|Q9CY57|CHTOP_MOUSE Chromatin target of PRMT1 protein OS=Mus musculus GN=Chtop PE=1 SV=2	-7.93855	10	26.5	249	3	0.4	1.51189	2
d1002	d1002.a1	d1002.a1.a1	sp|Q8BZW8|NHLC2_MOUSE NHL repeat-containing protein 2 OS=Mus musculus GN=Nhlrc2 PE=1 SV=1	-6.04001	2	78.3	725	3	0.0909091	0.232847	2
d1003	d1003.a1	d1003.a1.a1	sp|Q9Z1D1|EIF3G_MOUSE Eukaryotic translation initiation factor 3 subunit G OS=Mus musculus GN=Eif3g PE=1 SV=2	-13.6356	16	35.5	320	3	0.1875	0.539927	1
d1004	d1004.a1	d1004.a1.a1	sp|Q99K48|NONO_MOUSE Non-POU domain-containing octamer-binding protein OS=Mus musculus GN=Nono PE=1 SV=3	-9.36251	5	54.4	473	3	0.111111	0.29155	2
d1005	d1005.a1	d1005.a1.a1	sp|P97351|RS3A_MOUSE 40S ribosomal protein S3a OS=Mus musculus GN=Rps3a PE=1 SV=3	-14.7722	15	29.8	264	3	0.2	0.584893	2
d1006	d1006.a1	d1006.a1.a1	sp|P40336-2|VP26A_MOUSE Isoform 2 of Vacuolar protein sorting-associated protein 26A OS=Mus musculus GN=Vps26a	-14.3755	12	41.4	359	3	0.15	0.412538	2
d1006	d1006.a1	d1006.a1.a2	sp|P40336|VP26A_MOUSE Vacuolar protein sorting-associated protein 26A OS=Mus musculus GN=Vps26a PE=1 SV=1	-14.3755	14	38	327	3	0.176471	0.501311	2
d1007	d1007.a1	d1007.a1.a1	sp|Q8CBH5-2|MFSD6_MOUSE Isoform 2 of Major facilitator superfamily domain-containing protein 6 OS=Mus musculus GN=Mfsd6	-4.98088	6	85.6	774	3	0.1	0.258925	2
d1008	d1008.a1	d1008.a1.a1	sp|Q64012-2|RALY_MOUSE Isoform 1 of RNA-binding protein Raly OS=Mus musculus GN=Raly	-5.8122	7	31.1	296	3	0.153846	0.425103	2
d1008	d1008.a1	d1008.a1.a2	sp|Q64012|RALY_MOUSE RNA-binding protein Raly OS=Mus musculus GN=Raly PE=1 SV=3	-5.8122	6	33.1	312	3	0.153846	0.425103	2
d1009	d1009.a1	d1009.a1.a1	sp|P36552|HEM6_MOUSE Oxygen-dependent coproporphyrinogen-III oxidase, mitochondrial OS=Mus musculus GN=Cpox PE=1 SV=2	-5.32239	5	49.6	443	3	0.0833333	0.211528	2
d1010	d1010.a1	d1010.a1.a1	sp|P01867-2|IGG2B_MOUSE Isoform 2 of Ig gamma-2B chain C region OS=Mus musculus GN=Igh-3	-11.7053	12	36.5	335	3	0.333333	1.15443	2
d1010	d1010.a1	d1010.a1.a2	sp|P01867|IGG2B_MOUSE Ig gamma-2B chain C region OS=Mus musculus GN=Igh-3 PE=1 SV=3	-11.7053	10	44.1	404	3	0.272727	0.873817	2
d1011	d1011.a1	d1011.a1.a1	sp|Q8R404|MIC13_MOUSE MICOS complex subunit MIC13 OS=Mus musculus GN=Mic13 PE=1 SV=1	-8.8826	54	13.3	119	3	1	9	2
d1012	d1012.a1	d1012.a1.a1	sp|P17918|PCNA_MOUSE Proliferating cell nuclear antigen OS=Mus musculus GN=Pcna PE=1 SV=2	-9.88215	19	28.7	261	3	0.2	0.584893	2
d1013	d1013.a1	d1013.a1.a1	sp|P16460|ASSY_MOUSE Argininosuccinate synthase OS=Mus musculus GN=Ass1 PE=1 SV=1	-6.33143	7	46.5	412	3	0.111111	0.29155	2
d1014	d1014.a1	d1014.a1.a1	sp|Q9JIG7|CCD22_MOUSE Coiled-coil domain-containing protein 22 OS=Mus musculus GN=Ccdc22 PE=1 SV=1	-10.6522	8	70.7	627	3	0.103448	0.268961	2
d1015	d1015.a1	d1015.a1.a1	sp|P14131|RS16_MOUSE 40S ribosomal protein S16 OS=Mus musculus GN=Rps16 PE=1 SV=4	-6.93855	15	16.4	146	3	0.25	0.778279	2
d1016	d1016.a1	d1016.a1.a1	sp|P22907-2|HEM3_MOUSE Isoform 2 of Porphobilinogen deaminase OS=Mus musculus GN=Hmbs	-5.33819	12	37.7	344	3	0.142857	0.389495	2
d1016	d1016.a1	d1016.a1.a2	sp|P22907|HEM3_MOUSE Porphobilinogen deaminase OS=Mus musculus GN=Hmbs PE=1 SV=2	-5.33819	11	39.2	361	3	0.133333	0.359356	2
d1017	d1017.a1	d1017.a1.a1	sp|Q3U487|HECD3_MOUSE E3 ubiquitin-protein ligase HECTD3 OS=Mus musculus GN=Hectd3 PE=1 SV=2	-7.78728	3	97.2	861	3	0.0588235	0.145048	2
d1018	d1018.a1	d1018.a1.a1	sp|Q9CQ80|VPS25_MOUSE Vacuolar protein-sorting-associated protein 25 OS=Mus musculus GN=Vps25 PE=1 SV=1	-9.37882	27	20.7	176	3	0.2	0.584893	2
d1019	d1019.a1	d1019.a1.a1	sp|Q99J45|NRBP_MOUSE Nuclear receptor-binding protein OS=Mus musculus GN=Nrbp1 PE=1 SV=1	-8.69551	8	59.7	535	3	0.133333	0.359356	2
d1020	d1020.a1	d1020.a1.a1	sp|P10649|GSTM1_MOUSE Glutathione S-transferase Mu 1 OS=Mus musculus GN=Gstm1 PE=1 SV=2	-11.2396	10	25.9	218	2	0.133333	0.359356	1
d1021	d1021.a1	d1021.a1.a1	sp|O55126|NIPS2_MOUSE Protein NipSnap homolog 2 OS=Mus musculus GN=Gbas PE=1 SV=1	-5.40894	8	32.8	281	2	0.142857	0.389495	1
d1022	d1022.a1	d1022.a1.a1	sp|P61514|RL37A_MOUSE 60S ribosomal protein L37a OS=Mus musculus GN=Rpl37a PE=1 SV=2	-6.57512	29	10.2	92	2	0.5	2.16228	1
d1023	d1023.a1	d1023.a1.a1	sp|Q9CQ69|QCR8_MOUSE Cytochrome b-c1 complex subunit 8 OS=Mus musculus GN=Uqcrq PE=1 SV=3	-6.78569	26	9.7	82	2	0.666667	3.64159	1
d1024	d1024.a1	d1024.a1.a1	sp|P62320|SMD3_MOUSE Small nuclear ribonucleoprotein Sm D3 OS=Mus musculus GN=Snrpd3 PE=1 SV=1	-9.33199	24	13.8	126	2	0.4	1.51189	1
d1025	d1025.a1	d1025.a1.a1	sp|Q8R081|HNRPL_MOUSE Heterogeneous nuclear ribonucleoprotein L OS=Mus musculus GN=Hnrnpl PE=1 SV=2	-5.97306	7	63.8	586	2	0.117647	0.311134	1
d1026	d1026.a1	d1026.a1.a1	sp|Q9CX56|PSMD8_MOUSE 26S proteasome non-ATPase regulatory subunit 8 OS=Mus musculus GN=Psmd8 PE=1 SV=2	-6.78015	5	39.8	353	2	0.125	0.333521	1
d1027	d1027.a1	d1027.a1.a1	sp|Q9CWZ3-2|RBM8A_MOUSE Isoform 2 of RNA-binding protein 8A OS=Mus musculus GN=Rbm8a	-12.6364	25	19.7	173	2	0.5	2.16228	1
d1027	d1027.a1	d1027.a1.a2	sp|Q9CWZ3|RBM8A_MOUSE RNA-binding protein 8A OS=Mus musculus GN=Rbm8a PE=1 SV=4	-12.6364	25	19.8	174	2	0.4	1.51189	1
d1028	d1028.a1	d1028.a1.a1	sp|Q9DB34|CHM2A_MOUSE Charged multivesicular body protein 2a OS=Mus musculus GN=Chmp2a PE=1 SV=1	-7.72354	8	25	222	2	0.25	0.778279	1
d1029	d1029.a1	d1029.a1.a1	sp|Q80VQ1-3|LRRC1_MOUSE Isoform 3 of Leucine-rich repeat-containing protein 1 OS=Mus musculus GN=Lrrc1	-5.90413	6	39.7	349	2	0.166667	0.467799	1
d1029	d1029.a1	d1029.a1.a2	sp|Q80VQ1|LRRC1_MOUSE Leucine-rich repeat-containing protein 1 OS=Mus musculus GN=Lrrc1 PE=1 SV=2	-5.90413	4	59.3	524	2	0.0952381	0.245197	1
d1030	d1030.a1	d1030.a1.a1	sp|Q9CRB2|NHP2_MOUSE H/ACA ribonucleoprotein complex subunit 2 OS=Mus musculus GN=Nhp2 PE=1 SV=1	-5.95664	21	17.2	153	2	0.333333	1.15443	1
d1031	d1031.a1	d1031.a1.a1	sp|Q8JZN5|ACAD9_MOUSE Acyl-CoA dehydrogenase family member 9, mitochondrial OS=Mus musculus GN=Acad9 PE=1 SV=2	-5.93704	5	68.6	625	2	0.0666667	0.165914	1
d1032	d1032.a1	d1032.a1.a1	sp|Q6P5G6|UBXN7_MOUSE UBX domain-containing protein 7 OS=Mus musculus GN=Ubxn7 PE=1 SV=2	-4.95468	4	52	467	2	0.111111	0.29155	1
d1033	d1033.a1	d1033.a1.a1	sp|Q8CCS6-2|PABP2_MOUSE Isoform 2 of Polyadenylate-binding protein 2 OS=Mus musculus GN=Pabpn1	-5.54061	9	30.9	292	2	0.222222	0.668101	1
d1033	d1033.a1	d1033.a1.a2	sp|Q8CCS6|PABP2_MOUSE Polyadenylate-binding protein 2 OS=Mus musculus GN=Pabpn1 PE=1 SV=3	-5.54061	8	32.2	302	2	0.2	0.584893	1
d1034	d1034.a1	d1034.a1.a1	sp|P51863|VA0D1_MOUSE V-type proton ATPase subunit d 1 OS=Mus musculus GN=Atp6v0d1 PE=1 SV=2	-13.5143	6	40.2	351	2	0.133333	0.359356	1
d1035	d1035.a1	d1035.a1.a1	sp|A3KGV1-6|ODFP2_MOUSE Isoform 6 of Outer dense fiber protein 2 OS=Mus musculus GN=Odf2	-4.46117	6	73.2	638	2	0.0689655	0.172102	1
d1035	d1035.a1	d1035.a1.a2	sp|A3KGV1|ODFP2_MOUSE Outer dense fiber protein 2 OS=Mus musculus GN=Odf2 PE=1 SV=1	-4.46117	4	95.4	830	2	0.0526316	0.128838	1
d1036	d1036.a1	d1036.a1.a1	sp|P58044|IDI1_MOUSE Isopentenyl-diphosphate Delta-isomerase 1 OS=Mus musculus GN=Idi1 PE=1 SV=1	-5.79588	18	26.2	227	2	0.2	0.584893	1
d1037	d1037.a1	d1037.a1.a1	sp|Q9CXY6|ILF2_MOUSE Interleukin enhancer-binding factor 2 OS=Mus musculus GN=Ilf2 PE=1 SV=1	-6.29243	6	42.9	390	2	0.181818	0.519911	1
d1038	d1038.a1	d1038.a1.a1	sp|Q61703|ITIH2_MOUSE Inter-alpha-trypsin inhibitor heavy chain H2 OS=Mus musculus GN=Itih2 PE=1 SV=1	-8.08938	5	105.7	946	2	0.0555556	0.136464	1
